# Supplementary material for: Phagophore formation by the autophagy conjugation machinery
Source: Research Square preprint supplement (doi:10.21203/rs.3.rs-1269772/v1), 2022-01-25
Supplement: Supplementary file 1 [file 2ab010274f4eae393e062ed4.docx]

# Supplementary Information for

# Phagophore formation by the autophagy conjugation machinery

Jagan Mohan1, Christine Girard-Blanc1,4, Satish Moparthi1,3,4, Charlotte Nugues1, Sowmya Rama1, Stéphane Vassilopoulos2*, and Thomas Wollert1*

1 Membrane Biochemistry and Transport, Institut Pasteur, UMR3691 CNRS, 75015, Paris, France

2 Sorbonne Université, Institut National de la Santé et de la Recherche Médicale, Association Institut de Myologie, Centre de Recherche en Myologie, UMRS 974 CNRS, Paris, France

3 Current address : Sorbonne Université, Institut National de la Santé et de la Recherche Médicale, Association Institut de Myologie, Centre de Recherche en Myologie, UMRS 974 CNRS, Paris, France

4 Both authors contributed equally to this work.

* Corresponding authors: s.vassilopoulos@institut-myologie.org (SV); thomas.wollert@pasteur.fr (TW)

Supplementary Information contains Supplementary Figures 1, including corresponding figure legend as well as legends for Supplementary Movies 1-12.

## Supplementary Figures

**Figure S1:**

**Figure S7:** **Uncropped, original immunoblots.** Parts of the blots showing bands of interest are indicated by red rectangles.

## Supplementary Movie Legends

**Movie S1: Conjugation of LC3B to GUVs induces membrane deformations and budding.** Alexa488 labeled LC3BG120 (green) was conjugated to GUVs in the presence of ATG7, ATG3, ATG12–ATG5 and ATG16L1. The conjugation reaction was observed for 180 min. Corresponding still images at defined time points are shown in **Figure 1a**. Scale bar = 10 µm.

**Movie S2: Membrane buckling on GUVs upon LC3B conjugation.**

Three-dimensional reconstruction of the GUV shown in Figure 1a and in Supplementary Movie 1 at the end of the conjugation reaction form z-stacks.

**Movie S3: Formation of membrane cups from supported lipid bilayers by ATG16L1FL in vitro.**

The movie shows a PREM tomogram of a SLB to which LC3B was conjugated in the presence of the ATG12–ATG5-ATG16L1 complex.

**Movie S4: Formation of membrane cups from supported lipid bilayers by ATG16L1307 in vitro.**

The movie shows a PREM tomogram of a SLB to which LC3B was conjugated in the presence of the ATG12–ATG5-ATG16L1307 complex. A corresponding image at a tilt angle of 0° is shown in Figure **2f**.

**Movie S5: Expression of WIPI2-CAAX induces the formation of thin membrane cisternae at the plasma membrane.**

The movie shows a transmission electron tomogram of a WIPI2-CAAX expressing cell. Targeting of WIPI2 to the plasma membrane leads to the formation of thin membrane cisternae (red) at the plasma membrane (green). The morphology of this cisternae resembles that of thin cortical ER and omegasomes. A corresponding images is shown in **Extended Data Figure 5e**.

**Movie S6: Formation of membrane cups from thin cortical ER by ATG16L1 in vivo.**

The movie shows a PREM tomogram of a unroofed ATG16 KO cell expressing WIPI2-CAAX, LC3B and ATG16L1. A corresponding image is shown in **Figure 3i**.

**Movie S7: Formation of membrane rims on thin cortical ER by ATG16L1230 in vivo.**

The movie shows a PREM tomogram of a unroofed ATG16L1 KO cell expressing WIPI2-CAAX, LC3B and ATG16L1230. A corresponding image is shown in **Figure 3f**.

**Movie S8: Electron tomography of ATG16L1 vesicles in cells expressing ATG16L1FL.** Electron tomogram shows ATG16L1 vesicles, identified by CLEM of fluorescent labeled HA-tagged ATG16L1. Scale bar = 100 nm.

**Movie S9: Electron tomography of ATG16L1 vesicles in cells expressing ATG16L1307.** Electron tomogram shows ATG16L1 vesicles, identified by CLEM of fluorescent labeled HA-tagged ATG16L1307. Scale bar = 100 nm.

**Movie S10: Electron tomography of ATG16L1 vesicles in cells expressing ATG16L1264.** Electron tomogram shows ATG16L1 vesicles, identified by CLEM of fluorescent labeled HA-tagged ATG16L1264. Scale bar = 100 nm.

**Movie S11: Electron tomography of ATG16L1 vesicles in cells expressing ATG16L1230.** Electron tomogram shows ATG16L1 vesicles, identified by CLEM of fluorescent labeled HA-tagged ATG16L1230. Scale bar = 100 nm.

**Movie S12: Membrane intermediates during cup formation.**

The movie shows a series of PREM tomograms of unroofed ATG16L1 KO cells expressing WIPI2-CAAX, LC3B and different ATG16L1 variants as indicated. Characteristic membrane structures are highlighted in magenta. Thin cortical ER is present in cells expressing ATG16L1207 from which flat membrane rings are formed in ATG16L1230 expressing cells. Constriction of membrane rings might lead to the formation of membrane cups upon expression of ATG16L1FL.
