# Supplementary material for: Phagophore formation by the autophagy conjugation machinery
Source: Research Square preprint supplement (doi:10.21203/rs.3.rs-1269772/v1), 2022-01-25
Supplement: Supplementary file 1 [file da79d0b85be8222b08e2e877.pdf]

**a****ATG16L1<sup>FL</sup>**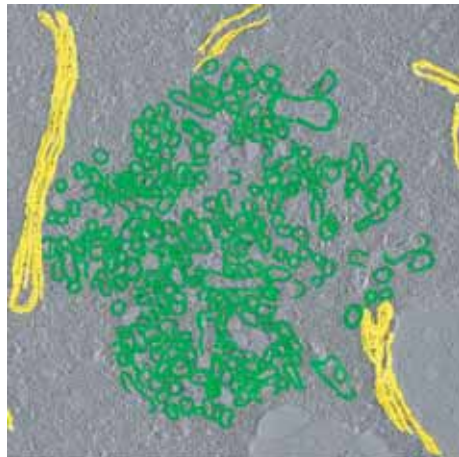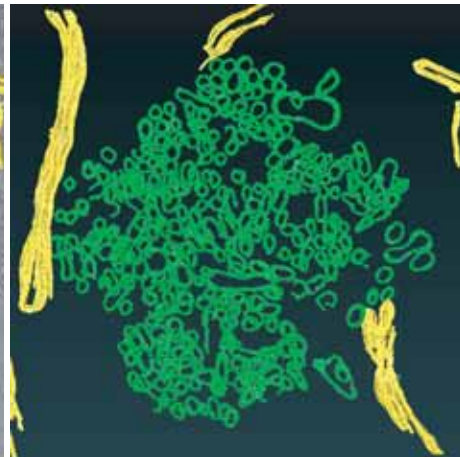**ATG16L1<sup>Δ230</sup>**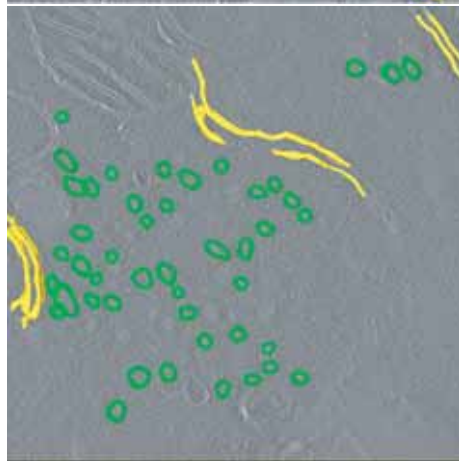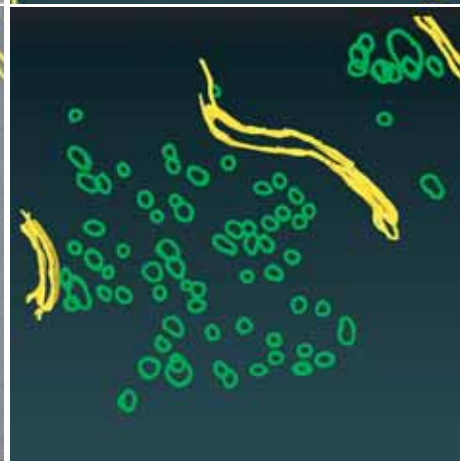**b**Intermediates of cup formation by ATG16L1<sup>FL</sup>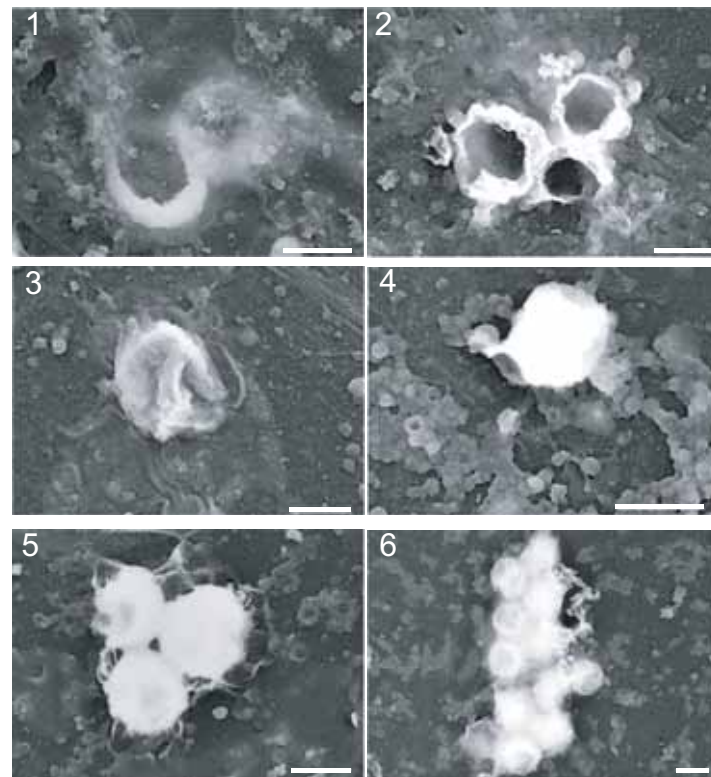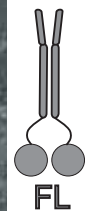

Extended Data Figure 8
