# Supplementary material for: Phagophore formation by the autophagy conjugation machinery
Source: Research Square preprint supplement (doi:10.21203/rs.3.rs-1269772/v1), 2022-01-25
Supplement: Supplementary file 3 [file f05f62616bb6ea6a076434f3.xlsx]

## Sheet: Recombinant Proteins
List of proteins purified for in vitro reconstitution of LC3B lipidation
	Insert	Vector	Expression strain	Medium
	LC3A	pCoofy1	E. coli, Rosetta	LB
	LC3B	pCoofy1	E. coli, Rosetta	LB
	Cys-LC3B	pCoofy1	E. coli, Rosetta	LB
	ATG7	pCoofy27	Insect cells, SF9	ICM + 5%FBS
	ATG3	pCoofy1	E. coli, Rosetta	LB
	ATG7-ATG10-His10-Cys-ATG12-ATG5	pST39	E. coli, Rosetta	LB
	ATG16L1 Full length	pCoofy29	Insect cells, H5	ICM
	ATG16L11-307	pCoofy4	E. coli, Rosetta	LB
	ATG16L11-264	pCoofy4	E. coli, Rosetta	LB
	ATG16L11-230	pCoofy4	E. coli, Rosetta	LB
	ATG16L11-207	pCoofy4	E. coli, Rosetta	LB
	ATG16L111-43	pCoofy4	E. coli, Rosetta	LB

## Sheet: Primers
List of Primers used in this study:
	DNA construct	Name of the primer	Sequence (5'---3')	Description	Source
	LC3B	LC3B pCoofy1 fw	aagttctgttccaggggcccatgccgtcggagaagaccttc	Bacterial expression, His tag Pre-scission digest	Wetzel et al, 2020
		LC3B pCoofy1 rv	ccccagaacatcaggttaatggcgttacccgaacgtctcctggg
	cys LC3B	LC3B CysIns fw	gttccaggggccctgcatgccgtcggagaag	Bacterial expression, His tag Pre-scission digest	This study
		LC3B CysIns rv	cttctccgacggcatgcagggcccctggaac
	ATG3	Atg3 Hs pCoofy1 fw	aagttctgttccaggggcccatgcagaatgtgattaatactgtgaagggaaagg	Bacterial expression, His tag Pre-scission digest	Wetzel et al, 2020
		Atg3 Hs pCoofy1 rv	ccccagaacatcaggttaatggcgttacattgtgaagtgtcttgtgtagtcatattctattgttgg
	ATG7	Atg7 Hs pCoofy1 fw	aagttctgttccaggggcccatggcggcagctacgg	Insect cell expression (SF9), His tag Pre-scission digest	Wetzel et al, 2020
		Atg7 Hs pCoofy1 rv	ccccagaacatcaggttaatggcgtcagatggtctcatcatcgctcatg
	ATG12-ATG5	pST39 lineralize rv	gaattcactggccgtcgttttacagg	Bacterial expression, His tag Pre-scission digest	Wetzel et al, 2020
		pST39 lineralize fw	ggtaccagcggataacaatttcacatc
		InFus Atg7 fw	acggccagtgaattcaataattttgtttaactttaagaaggagatatacat atggcggcagctacgggg
		InFus Atg7 rv	tcagatggtctcatcatcgctcatgtc
		InFus Atg10 fw	gatgagaccatctgaaataattttgtttaactttaagaaggagatatacat atggaagaagatgagttcattggag
		InFus Atg10 rv	ttaagggacatttcgttcatcctg
		InFus Atg12 fw	cgaaatgtcccttaaaataattttgtttaactttaagaaggagatatacat atgactagccgggaacaccaag
		InFus Atg12 rv pST39 lineralize2 rv	ttatccgctggtacctcatccccacgcctgagac tcatccccacgcctgagac
		InFus Atg5 His fw	caggcgtggggatgaaataattttgtttaactttaagaaggagatatacat atgggcagcagccatcaccatcaccatcacggcagcatgacagatgacaaagatgtgcttc
		InFus Atg5 rv	tcaatctgttggctgtggg
	ATG16L1	Atg16L1 pCoofy29 IF1 fw	gccatcagcagagcagccactaagcgactctcgcagcctgctggaggcct tctggattctatcactaatatctttgggagacgctctgtctcttccttccc	Insect cell expression (H5), His-MBP tag Pre-scission digest	This study
		Atg16L1 pCoofy29 IF1 rv	gggaaggaagagacagagcgtctcccaaagatattagtgatagaatccagaaggcctccagcaggctgcgagagtcgcttagtggctgctctgctgatggc
	ATG16L1*	ATG16L1 pCoofy4 fw 207/230/264/307	acctgggatgccgtacgttacaacggcaagc
	ATG16L1 207	ATG16L1 pCoofy4 rw 207	gaagccaatcggcttaatgcatgactcgagataataata	Bacterial expression, His-MBP tag Pre-scission digest	This study
	ATG16L1 230	ATG16L1 pCoofy4 rw 230	ttgcagaagcagcaaaggaatgactcgagataataata	Bacterial expression, His-MBP tag Pre-scission digest	This study
	ATG16L1 264	ATG16L1 pCoofy4 rw 264	cgagccatcagcagagcagcctgactcgagataataata	Bacterial expression, His-MBP tag Pre-scission digest	This study
	ATG16L1 307	ATG16L1 pCoofy4 rw 307	catcctggttctggtaaagaatgactcgagataataata	Bacterial expression, His-MBP tag Pre-scission digest	This study
	ATG16L1 43 (Nt)	ATG16L1 pCoofy4 1-43 Stop fw	ctgcagtataacaaattgctgtaaaagtcagatcttcattcagtg	Bacterial expression, His-MBP tag Pre-scission digest	This study
		ATG16L1 pCoofy4 1-43 Stop rv	cactgaatgaagatctgacttttacagcaatttgttatactgcag
	3HA ATG16L1*	ATG16L1 3HA-pLPCX fw 43/207/230/264/307/319/FL	ataataatagaattcatgtcgtcgggcctccgcgcc
	3HA ATG16L1 43 (Nt)	ATG16L1 3HA-pLPCX rv primer 1-43	ctgcagtataacaaattgctgtgagcggccgcataataata	Mammalian expression, 3HA tag	This study
	3HA ATG16L1 207	ATG16L1 3HA-pLPCX rv primer 1-207	gaagccaatcggcttaatgcatgagcggccgcataataata	Mammalian expression, 3HA tag	This study
	3HA ATG16L1 230	ATG16L1 3HA-pLPCX rv primer 1-230	cttgcagaagcagcaaaggaatgagcggccgcataataata	Mammalian expression, 3HA tag	This study
	3HA ATG16L1 264	ATG16L1 3HA-pLPCX rv primer 1-264	cgagccatcagcagagcagcctgagcggccgcataataata	Mammalian expression, 3HA tag	This study
	3HA ATG16L1 307	ATG16L1 3HA-pLPCX rv primer 1-307	catcctggttctggtaaagaatgagcggccgcataataata	Mammalian expression, 3HA tag	This study
	3HA ATG16L1 319	ATG16L1 3HA-pLPCX rv primer 1-319	actgccttgtgtgtcttcgattgagcggccgcataataata	Mammalian expression, 3HA tag	This study
	3HA ATG16L1 FL	ATG16L1 3HA-pLPCX rv primer FL	gctgtgctgtgggcacagtactgagcggccgcataataata	Mammalian expression, 3HA tag	This study
	mCherry ATG16L1 207	ATG16 L1 207 mCherry-pLPCX fw	cggcttaatgcatagaatgaaaaagactccagg	Mammalian expression, mCherry tag	This study
		ATG16 L1 207 mCherry -pLPCX rv	cctggagtctttttcattctatgcattaagccg
	mCherry ATG16L1 230	ATG16 L1 230 mCherry-pLPCX fw	gaagcagcaaagtaacctctaccagtcgaa	Mammalian expression, mCherry tag	This study
		ATG16 L1 230 mCherry -pLPCX rv	ttcgactggtagaggttactttgctgcttc
	mCherry ATG16L1 264	ATG16 L1 264 mCherry-pLPCX fw	agagcagccacttagcgactctcgcagcctgct	Mammalian expression, mCherry tag	This study
		ATG16 L1 264 mCherry -pLPCX rv	agcaggctgcgagagtcgctaagtggctgctct
	mCherry ATG16L1 307	ATG16 L1 307 mCherry-pLPCX fw	tctggtaaagaagtgtgagtaccagctactgcc	Mammalian expression, mCherry tag	This study
		ATG16 L1 307 mCherry -pLPCX rv	ggcagtagctggtactcacacttctttaccaga
	mCherry ATG16L1 FL	ATG16 L1 FL mCherry-pLPCX fw	gccaccatggtgagcatggccatcatcaaggagttcatg	Mammalian expression, mCherry tag	This study
		ATG16 L1 FL mCherry -pLPCX rv	aagtccggccggtggagaaactcgagcttgtcgatc
	Wipi2b FTTG CAAX			Mammalian expression, CAAX tag	From Sharoon Tooze lab
	mKate2-ATG14	mKate2 ATG14 fw	GTTCCGGACTCAAGATCTCGAGCTC	Mammalian expression, mKate 2 tag	This study
		mKate2 ATG14 rev	GAGCTCGAGATCTTGAGTCCGGAAC
	pUNO1-hULK1			Mammalian expression	InvivoGen
	GFP LC3B			Mammalian expression, GFP tag	Wetzel et al, 2020

## Sheet: Antibodies
List of Antibodies used in this study:
	Antibody	Company/Ref no:	Application	Dilution
	anti rabbit HA	Cell Signaling / 3724S	Western blot / IGL	1։1000 / 1:20
	anti mouse HA	Santa cruz / SC7392 X	IF	1։250
	anti mouse ATG16L1	MBL / 150-3	Western blot	1։1000
	anti rabbit LC3B	Cell Signaling / 3868T	Western blot	1։1000
	anti rabbit LC3B	MBL / PMO-36	IF	1։500
	anti rabbit GAPDH	Cell Signaling / 5174s	Western blot	1։1000
	anti mouse WIPI2	Abcam / Ab105459	IF	1։1000
	anti rabbit GFP	Invitrogen / A6455	IF / IGL	1:500 / 1:20
	anti rabbit Alexa Fluor 488	Invitrogen / A11034	IF	1:500
	anti mouse actin	Thermofisher / MA1-140	Western blot	1։1000
	anti rabbit ATG14	Cell Signaling / 5504	Western blot	1։1000
	anti rabbit RFP	Invitrogen / R10364	IF	1:500
	anti rabbit Alexa Fluor 594	Invitrogen / A11037	IF	1:500
	anti rabbit ULK1	Cell Signaling / 8054	Western blot	1։1000
	anti mouse ULK1	Santa Cruz / Sc-390904	IF	1:100
	anti mouse Alexa Fluor 647	Invitrogen / A21235	IF	1:500

## Sheet: siRNA
List of siRNAs used in this study:
	siRNA	Company / Ref no / ID:
	ULK1	Thermofisher Ambion / 4392420 / s15964
	ATG14	Thermofisher Ambion / 4392420 / s22528

## Sheet: Reagents
List of Reagents used in this study:
	Name	Company / Ref no:
	1,2-dioleoyl-sn-glycero-3-phosphoethanolamine (DOPE,18:1)	Avanti Polar Lipids / 850725
	1,2-dioleoyl-sn-glycero-3-phosphocholine (DOPC,18:1)	Avanti Polar Lipids / 850375
	1-palmitoyl-2-oleoyl-sn-glycero-L-serine (POPS,16:0-18:1)	Avanti Polar Lipids / 840034
	Cholesterol	Avanti Polar Lipids / 700000
	Lissamine rhodamine PE	Avanti Polar Lipids / 810158
	DMEM	Gibco / 31966-021
	Penicillin-Streptomycin	Gibco / 15140-122
	Earle’s Balanced Salt Solution (EBSS)	Sigma Aldrich/ E2888
	TransIT-HeLaMONSTER Transfection Kit	Mirus / MIR2900
	Optimem	Gibco / 31985-062
	PMSF	CARL ROTH / 6367.2
	Complete protease inhibitor cocktail	Sigma Aldrich / Roche-11697498001
	Pierce BCA protein assay kit	Thermo Fischer / #23225
	Super signal West Pico chemiluminescent substrate	Thermo Fischer / 34577
	Alexa Fluor 488 C5 Malemide	Thermo Fischer / A10254
	Atto590	ATTO-TEC / AD590
	HiTrap Desalting columns	GE healthcare
	Zeba Spin Desalting Columns	Thermo scientific / 87768
	Dithiothreitol (DTT)	Biochemika-Applichem / A1101
	EDTA	CARL ROTH / T136.1
	EX-CELL 420 Serum Free Medium	Sigma Aldrich / 14420C
	Benzonase	Sigma Aldrich / 70664
	Paraformaldehyde	EMS 15714
	Glutaraldehyde	Roth 4995.1
	Ammonium Chloride	Sigma Aldrich / A9434
	Gelatin	Sigma Aldrich / G2500
	Sucrose	Sigma Aldrich / S0389
	Methylcellulose	Sigma Aldrich / M6385
	BSA	Fischer scientific / BP9703
	DAPI	NucBlue R37606
	SAR405	Ape Bio / A8883
	SBI-0206965	Sigma Aldrich / SML1540
	Cryo ultramicrotome sample pin	LFG 75959-06
	Diamond knife cryo immuno	Leica 16DIA.DCIMM3530
	Fomvar/carbon-coated copper finder grids Cu HF15	Oxford instruments AGG245
	Trim 45	Leica 16DIA.DTB45
	Cryo sectioning on LEICA – UC6-FC6
	Electron Cryo Microscope Tecnai biotwin 120 cryo
	Software Serial EM
	Software Midas
	Software Amira
