# Supplementary material for: Phagophore formation by the autophagy conjugation machinery
Source: Research Square preprint supplement (doi:10.21203/rs.3.rs-1269772/v1), 2022-01-25
Supplement: Supplementary file 4 [file 486f3bc30d0ad22417a2ad3e.xlsx]

## Sheet: Figure 2(b-c)
GUVs FRAP curves
Time	Time	Mean Nt	Mean 230	Mean-264	Mean-307		SD-Nt	SD-230	SD-264	SD-307
							chanl.01		chanl.01	chanl.01
0	0	1	1	1	1		0	0	0	0
1.725	1.725	1.02	0.944418	1.01298	0.958654		0.0882849	0.123733	0.11459	0.116242
3.446	3.446	0.992659	0.969693	1.01272	0.95514		0.0498503	0.10685	0.113638	0.0840918
5.171	5.171	1.02291	0.975296	1.01122	1.02747		0.0906477	0.123568	0.145488	0.0795723
6.896	6.896	1.03658	0.967555	1.05425	0.936504		0.113672	0.128652	0.11116	0.0801068
12.236	0	0	0	0	0		0	0	0	0
13.961	1.725	0.120342	0.0284943	0.0555987	0.018139		0.0543002	0.0884241	0.0641831	0.0382199
15.686	3.45	0.227431	0.0680378	0.0414075	0.0500774		0.0770759	0.05558	0.0656629	0.0372763
17.408	5.172	0.20532	0.111959	0.0902474	0.0360872		0.0985904	0.0518969	0.0792475	0.0238031
19.133	6.897	0.256656	0.137855	0.0642297	0.0507809		0.083947	0.0678274	0.0599604	0.0330136
20.858	8.622	0.256698	0.114944	0.0956878	0.0364476		0.0779726	0.130776	0.0816129	0.0217242
22.583	10.347	0.263045	0.13781	0.093372	0.0509387		0.109516	0.0773574	0.0964899	0.0373773
24.308	12.072	0.289568	0.15335	0.137855	0.0500727		0.0959819	0.0897732	0.0915081	0.015312
26.033	13.797	0.29934	0.170814	0.128119	0.0444917		0.0866691	0.0766714	0.0756023	0.0330029
27.758	15.522	0.291782	0.131568	0.147676	0.0633447		0.0871485	0.075538	0.0830555	0.0414756
29.48	17.244	0.337435	0.194776	0.119017	0.0592147		0.116478	0.0615465	0.113401	0.0334252
31.205	18.969	0.29391	0.167422	0.100054	0.0556387		0.0933888	0.104337	0.0999624	0.0403848
32.93	20.694	0.355375	0.156162	0.123533	0.0546587		0.1018	0.0533787	0.128888	0.051542
34.655	22.419	0.308715	0.139461	0.140005	0.078749		0.113703	0.0753583	0.113753	0.0304889
36.38	24.144	0.353064	0.17901	0.157512	0.0569748		0.109429	0.0795131	0.114709	0.0318087
38.105	25.869	0.332183	0.134434	0.166022	0.0666055		0.116543	0.0905844	0.0942026	0.0258071
39.83	27.594	0.333701	0.211913	0.131891	0.0566591		0.110629	0.0768307	0.0905051	0.030448
41.551	29.315	0.34416	0.161719	0.180314	0.0682306		0.0896974	0.0997558	0.103663	0.0474754
43.276	31.04	0.35461	0.160843	0.144347	0.0441647		0.103931	0.0905925	0.0940127	0.0249151
45.001	32.765	0.351817	0.195519	0.190662	0.0617878		0.0974787	0.0703858	0.135471	0.023304
46.726	34.49	0.387588	0.19452	0.143442	0.0773326		0.113319	0.104516	0.106962	0.0204599
48.451	36.215	0.363848	0.225138	0.15534	0.0551394		0.103296	0.104754	0.114865	0.0298317
50.176	37.94	0.35417	0.223518	0.171746	0.0729529		0.117613	0.0605586	0.109781	0.0196772
51.901	39.665	0.371215	0.196202	0.196817	0.0638685		0.11209	0.125928	0.134801	0.0125718
53.626	41.39	0.388639	0.214001	0.193326	0.0503788		0.125882	0.0758797	0.133731	0.0349573
55.348	43.112	0.39367	0.209766	0.166154	0.0795299		0.106734	0.0794889	0.110981	0.0204998
57.073	44.837	0.403845	0.220753	0.188351	0.0593644		0.127087	0.107432	0.113319	0.023737
58.798	46.562	0.426521	0.206564	0.164663	0.074105		0.133354	0.123935	0.131738	0.0303739
60.523	48.287	0.363799	0.267511	0.169719	0.0763949		0.0995417	0.0966004	0.119388	0.0238281
62.248	50.012	0.384798	0.209493	0.168271	0.0822935		0.0885967	0.102324	0.133587	0.0383327
63.973	51.737	0.408594	0.221529	0.16048	0.0823014		0.0924692	0.111548	0.127922	0.0253464
65.698	53.462	0.387391	0.246313	0.192588	0.0680237		0.117504	0.107427	0.114275	0.030679
67.42	55.184	0.419847	0.228016	0.176987	0.101764		0.126626	0.131393	0.138303	0.0156349
69.145	56.909	0.406486	0.217164	0.219501	0.0708743		0.125672	0.112772	0.144958	0.0288669
70.87	58.634	0.404052	0.240386	0.172629	0.071795		0.105251	0.0895659	0.141994	0.0142691
72.595	60.359	0.421338	0.219417	0.19623	0.0833153		0.12107	0.103771	0.150503	0.0162262
74.32	62.084	0.391542	0.243281	0.208776	0.0510031		0.118722	0.100056	0.155436	0.028755
76.045	63.809	0.401302	0.269373	0.197766	0.0774952		0.115411	0.113279	0.137971	0.0185127
77.77	65.534	0.431529	0.276839	0.194323	0.0642847		0.137724	0.105005	0.152402	0.0144156
79.491	67.255	0.433852	0.241822	0.191147	0.086953		0.136852	0.148749	0.123041	0.0145384
89.496	77.26	0.474327	0.243555	0.195107	0.0776653		0.143699	0.127556	0.14778	0.0254838
99.495	87.259	0.42547	0.219783	0.197954	0.100449		0.109394	0.0698118	0.178307	0.0225004
109.495	97.259	0.432183	0.280577	0.191123	0.0789197		0.131709	0.111964	0.15745	0.0147762
119.496	107.26	0.440987	0.265248	0.235835	0.0994758		0.124282	0.0949848	0.187823	0.0356851
129.495	117.259	0.412927	0.261865	0.208424	0.0870662		0.12795	0.105977	0.201358	0.0197193
139.496	127.26	0.432853	0.2535	0.207967	0.107539		0.129323	0.156514	0.186173	0.0257081
149.495	137.259	0.412367	0.264417	0.220935	0.0815296		0.1242	0.1447	0.202574	0.0244945
159.496	147.26	0.456922	0.289186	0.210949	0.08052		0.152589	0.123111	0.207518	0.0116609
169.496	157.26	0.408081	0.251986	0.223559	0.0901558		0.124092	0.135086	0.222722	0.0330475
179.495	167.259	0.420729	0.260748	0.206384	0.118831		0.124434	0.149561	0.209655	0.0391283
189.496	177.26	0.407465	0.260981	0.223527	0.0924566		0.134783	0.153621	0.221306	0.010117
199.495	187.259	0.397464	0.258398	0.215425	0.09843		0.140969	0.193972	0.209976	0.0159588
209.496	197.26	0.403749	0.271075	0.251232	0.100501		0.15794	0.151872	0.215272	0.0177974
219.496	207.26	0.425089	0.272881	0.206961	0.0964419		0.16691	0.165616	0.243765	0.0332328
229.496	217.26	0.444766	0.292906	0.176592	0.108739		0.164003	0.161925	0.227266	0.0429475
239.496	227.26	0.398387	0.312926	0.206617	0.0842089		0.148979	0.171558	0.22476	0.0373009
249.495	237.259	0.437831	0.275112	0.218366	0.0860349		0.166822	0.18685	0.254168	0.0400073
259.496	247.26	0.395661	0.270074	0.235058	0.0902595		0.149345	0.174097	0.252838	0.0300569
269.496	257.26	0.426733	0.295449	0.215279	0.0808574		0.185966	0.208815	0.254407	0.0463644
279.496	267.26	0.409697	0.287173	0.198008	0.0740934		0.179701	0.170677	0.245367	0.0501732
289.496	277.26	0.417604	0.295524	0.201762	0.0794892		0.190481	0.211094	0.238215	0.0168682
299.496	287.26	0.41132	0.237055	0.201995	0.0810614		0.193221	0.249337	0.270436	0.0444854
309.496	297.26	0.402829	0.27535	0.223808	0.0646255		0.167696	0.221719	0.258037	0.0443603
319.495	307.259	0.436561	0.230499	0.182598	0.079933		0.180818	0.264347	0.250836	0.0670461
329.496	317.26	0.363666	0.234618	0.185528	0.0792932		0.216471	0.200955	0.252391	0.0503791
339.496	327.26	0.436361	0.22173	0.210572	0.0823435		0.203768	0.217544	0.243798	0.0438522
349.496	337.26	0.376781	0.260421	0.205637	0.0723085		0.188549	0.225426	0.270578	0.0559823
359.496	347.26	0.408243	0.300837	0.184551	0.0750449		0.203074	0.217327	0.256422	0.0432253
369.496	357.26	0.401575	0.260161	0.225243	0.0696917		0.195295	0.230137	0.272105	0.0447527
379.496	367.26	0.404026	0.269114	0.212828	0.0743978		0.186549	0.220867	0.278752	0.069311
389.496	377.26	0.433073	0.228977	0.197718	0.0677483		0.216526	0.278083	0.246174	0.0536823
399.496	387.26	0.380718	0.286748	0.186395	0.0912984		0.183906	0.273146	0.240235	0.0439748
409.496	397.26	0.44167	0.283005	0.293895	0.0506358		0.207262	0.251144	0.297208	0.0511587
419.496	407.26	0.442722	0.265699	0.229325	0.0634977		0.208578	0.255989	0.280541	0.064623
429.496	417.26	0.485408	0.264131	0.201	0.0650865		0.22908	0.234534	0.274147	0.0562694
439.496	427.26	0.409595	0.228713	0.209879	0.0783491		0.190984	0.309291	0.265488	0.0728022
449.496	437.26	0.415355	0.283906	0.19935	0.097134		0.197725	0.270378	0.268552	0.0798711
459.496	447.26	0.433092	0.283606	0.207031	0.062008		0.198761	0.263949	0.285377	0.0535943
469.496	457.26	0.453364	0.277513	0.16827	0.079904		0.203045	0.303048	0.282984	0.0660065
479.496	467.26	0.432325	0.252205	0.222412	0.0790686		0.202723	0.311549	0.300548	0.0588809
489.496	477.26	0.461665	0.336987	0.200158	0.0697161		0.188507	0.31173	0.311424	0.0590706
499.496	487.26	0.415927	0.262311	0.208752	0.0628219		0.18165	0.269759	0.295231	0.0561676
509.496	497.26	0.485517	0.23086	0.197126	0.0798543		0.228297	0.292167	0.278241	0.0801614
519.496	507.26	0.482401	0.29505	0.177693	0.0805073		0.200803	0.32406	0.298215	0.0713882
529.496	517.26	0.495461	0.29781	0.163124	0.0722629		0.22639	0.270799	0.268563	0.0772041
539.496	527.26	0.470049	0.264318	0.198056	0.0923605		0.190773	0.265956	0.312879	0.0926419
549.496	537.26	0.451832	0.292289	0.209278	0.089478		0.181014	0.290211	0.294077	0.078571
559.496	547.26	0.475548	0.31677	0.174017	0.0810983		0.161923	0.268792	0.308356	0.093435
569.496	557.26	0.425949	0.316805	0.174446	0.0733876		0.190828	0.281348	0.302696	0.0829776
579.496	567.26	0.484228	0.275383	0.212684	0.0673648		0.193459	0.243029	0.300116	0.100207
589.496	577.26	0.440261	0.307315	0.194158	0.0589687		0.171101	0.294268	0.322302	0.0714522
599.496	587.26	0.45568	0.258479	0.199834	0.0552184		0.21192	0.27799	0.302537	0.093992
609.496	597.26	0.419625	0.259576	0.187742	0.0865687		0.211963	0.254404	0.316936	0.0862114
619.496	607.26	0.456777	0.301769	0.183801	0.0816054		0.18696	0.314364	0.321028	0.111992
629.496	617.26	0.452516	0.291807	0.182675	0.0592808		0.187513	0.290737	0.296694	0.0887327
639.496	627.26	0.440312	0.290345	0.145231	0.0778829		0.187184	0.278744	0.316092	0.0949538
649.496	637.26	0.434916	0.290803	0.167176	0.0812819		0.170232	0.300599	0.347553	0.119407
659.496	647.26	0.443992	0.326457	0.196811	0.0732204		0.176638	0.311625	0.319724	0.104511
669.496	657.26	0.466585	0.320428	0.194186	0.0740195		0.188394	0.298998	0.327242	0.0902734
679.496	667.26	0.443481	0.347346	0.173012	0.0682116		0.17591	0.316102	0.337068	0.0819367
Nt_N =8	Nt_Mean	Nt_SD		230_N =11	230_Mean	230_SD		264_N =8	264_Mean	264_SD		307_N=6	307_Mean	307_SD
50	53.625	10.0561		35	38.1818	13.8262		35	23.375	8.17553		10	8.83333	5.11534
70				30				20				11
40				65				10				3
60				60				20				13
60				50				30				2
57				30				25				14
42				30				30
50				38				17
				25
				30
				27
					ATG16L1*	Nt	230	264	307
					Mean	53.63	38.18	23.38	8.84
					SD	10.06	13.83	8.18	5.11
Half-time	7,135 to 9,851	14,13 to 19,02	10,10 to 14,12	6,425 to 12,58
Goodness of Fit
Degrees of Freedom	98	98	98	98
R squared	0.8035	0.7984	0.7627	0.4812
Sum of Squares	0.1107	0.08013	0.04648	0.01732
Sy.x	0.03362	0.02859	0.02178	0.01329
Constraints
Y0	Y0 = 0	Y0 = 0	Y0 = 0	Y0 = 0
Plateau	Plateau < 0,8	Plateau < 0,8	Plateau < 0,8	Plateau < 0,8
K	K > 0	K > 0	K > 0	K > 0
Number of points
# of X values	100	100	100	100
# Y values analyzed	100	100	100	100

## Sheet: Figure 5(b)
ATG14 siRNA
Targeting Quantification
ATG14	field of view	total cell number	nb cells with targeting	% targeting
Ctrl1	1	25	5	19.4805
	2	26	5
	3	26	5
Ctrl2	1	56	17	32.2581
	2	34	19
	3	34	4
Ctrl3	1	44	14	26.3158
	2	20	1
	3	31	10
Ctrl4	1	38	11	29.3194
	2	40	11
	3	40	11
	4	42	11
	5	31	12
Ctrl5	1	52	20	40
	2	44	17
	3	39	11
	4	30	13
	5	35	19
KD1	1	31	12	45.9184
	2	22	10
	3	45	23
KD2	1	20	9	54.023
	2	32	24
	3	35	14
KD3	1	28	8	50
	2	25	14
	3	31	20
KD4	1	21	10	33.0986
	2	26	5
	3	33	9
	4	29	10
	5	33	13
KD5	1	42	9	34.3284
	2	40	11
	3	46	16
	4	36	19
	5	37	14
ULK1 siRNA
Targeting Quantification
ATG14	field of view	total cell number	nb cells with targeting	% targeting
Ctrl1	1	24	3	16.4557
	2	34	9
	3	21	1
Ctrl2	1	41	18	33.3333
	2	26	10
	3	26	3
Ctrl3	1	33	10	28.5714
	2	13	4
	3	24	6
Ctrl4	1	20	5	32.6531
	2	19	6
	3	23	9
	4	17	4
	5	19	8
Ctrl5	1	31	7	31.3869
	2	24	10
	3	25	8
	4	26	9
	5	31	9
KD1	1	26	7	35.7798
	2	45	22
	3	38	10
KD2	1	28	6	27.907
	2	30	8
	3	28	10
KD3	1	27	8	39.5349
	2	25	12
	3	34	14
KD4	1	22	5	28.0488
	2	14	4
	3	18	6
	4	14	5
	5	14	3
KD5	1	28	6	27.6423
	2	19	5
	3	27	10
	4	22	6
	5	27	7

## Sheet: Figure 5(c)
Starvation-dependent recruitment of GFP-LC3B
REPEAT 1
	0 hr					1 hr					2 hr					3 hr					4 hr
	cells with targeting	total nb of cells in the fov	% per fov			cells with targeting	total nb of cells in the fov	% per fov			cells with targeting	total nb of cells in the fov	% per fov			cells with targeting	total nb of cells in the fov	% per fov			cells with targeting	total nb of cells in the fov	% per fov
fov1	6	17	35.2941		fov1	7	16	43.75		fov1	5	10	50		fov1	3	8	37.5		fov1	5	12	41.6667
fov2	3	9	33.3333		fov2	4	14	28.5714		fov2	6	10	60		fov2	7	10	70		fov2	4	7	57.1429
fov3	7	12	58.3333		fov3	5	12	41.6667		fov3	8	13	61.5385		fov3	3	8	37.5		fov3	4	8	50
fov4	5	15	33.3333		fov4	11	17	64.7059		fov4	6	15	40		fov4	4	9	44.4444		fov4	2	3	66.6667
fov5	4	13	30.7692		fov5	6	12	50		fov5	7	12	58.3333		fov5	3	11	27.2727		fov5	5	10	50
fov6	0	13	0		fov6	6	13	46.1538		fov6	7	9	77.7778		fov6	4	7	57.1429		fov6	6	7	85.7143
fov7	4	12	33.3333		fov7	7	12	58.3333		fov7	4	9	44.4444		fov7	1	10	10		fov7	7	9	77.7778
fov8	6	16	37.5		fov8	3	9	33.3333		fov8	6	9	66.6667		fov8	6	8	75		fov8	5	6	83.3333
fov9	4	13	30.7692		fov9	8	15	53.3333		fov9	5	9	55.5556		fov9	8	11	72.7273		fov9	6	12	50
fov10	9	13	69.2308		fov10	5	10	50		fov10	6	12	50		fov10	9	11	81.8182		fov10	10	11	90.9091
TOTAL	48	133			TOTAL	62	130			TOTAL	60	108			TOTAL	48	93			TOTAL	54	85
% cells with PM targeting	36.0902				% cells with PM targeting	47.6923				% cells with PM targeting	55.5556				% cells with PM targeting	51.6129				% cells with PM targeting	63.5294
REPEAT 2
	0 hr					1 hr					2 hr					3 hr					4 hr
	cells with targeting	total nb of cells in the fov	% per fov			cells with targeting	total nb of cells in the fov	% per fov			cells with targeting	total nb of cells in the fov	% per fov			cells with targeting	total nb of cells in the fov	% per fov			cells with targeting	total nb of cells in the fov	% per fov
fov1	2	10	20		fov1	3	12	25		fov1	2	5	40		fov1	4	5	80		fov1	6	10	60
fov2	0	6	0		fov2	4	5	80		fov3	6	9	66.6667		fov2	4	6	66.6667		fov2	5	7	71.4286
fov3	4	5	80		fov3	3	5	60		fov4	0	7	0		fov3	2	5	40		fov3	0	6	0
fov4	7	10	70		fov4	2	8	25		fov5	2	6	33.3333		fov4	1	4	25		fov4	2	4	50
fov5	4	10	40		fov5	6	9	66.6667		fov6	3	5	60		fov5	0	3	0		fov5	3	6	50
fov6	1	8	12.5		fov6	3	6	50		fov7	3	10	30		fov6	3	4	75		fov6	1	3	33.3333
fov7	7	10	70		fov7	3	4	75		fov8	3	6	50		fov7	6	11	54.5455		fov7	3	8	37.5
fov8	3	9	33.3333		fov8	4	5	80		fov9	6	7	85.7143		fov8	3	6	50		fov8	2	7	28.5714
fov9	8	15	53.3333		fov9	3	8	37.5		fov10	3	9	33.3333		fov9	4	5	80		fov9	6	11	54.5455
fov10	5	8	62.5		fov10	4	7	57.1429		fov11	2	6	33.3333		fov10	1	3	33.3333		fov10	5	12	41.6667
% cells with PM targeting	44.1667				% cells with PM targeting	55.631				% cells with PM targeting	43.2381				% cells with PM targeting	50.4545				% cells with PM targeting	42.7045
REPEAT 3
	0 hr					1 hr					2 hr					3 hr					4 hr
	cells with targeting	total nb of cells in the fov	% per fov			cells with targeting	total nb of cells in the fov	% per fov			cells with targeting	total nb of cells in the fov	% per fov			cells with targeting	total nb of cells in the fov	% per fov			cells with targeting	total nb of cells in the fov	% per fov
fov1	4	13	30.7692		fov1	1	7	14.2857		fov1	2	6	33.3333		fov1	2	6	33.3333		fov1	7	9	77.7778
fov2	0	4	0		fov2	1	8	12.5		fov3	4	19	21.0526		fov2	4	9	44.4444		fov2	3	10	30
fov3	3	10	30		fov3	3	9	33.3333		fov4	12	24	50		fov3	4	11	36.3636		fov3	5	10	50
fov4	2	7	28.5714		fov4	1	7	14.2857		fov5	3	11	27.2727		fov4	3	10	30		fov4	2	10	20
fov5	2	10	20		fov5	2	9	22.2222		fov6	1	7	14.2857		fov5	2	10	20		fov5	3	12	25
fov6	0	6	0		fov6	0	10	0		fov7	7	13	53.8462		fov6	5	12	41.6667		fov6	4	11	36.3636
fov7	0	4	0		fov7	4	12	33.3333		fov8	0	10	0		fov7	4	9	44.4444		fov7	5	17	29.4118
fov8	5	13	38.4615		fov8	5	10	50		fov9	4	11	36.3636		fov8	2	9	22.2222		fov8	9	21	42.8571
fov9	1	13	7.69231		fov9	3	7	42.8571		fov10	1	5	20		fov9	5	8	62.5		fov9	4	8	50
fov10	2	8	25		fov10	2	10	20		fov11	7	15	46.6667		fov10	5	10	50		fov10	6	14	42.8571
% cells with PM targeting	18.0495				% cells with PM targeting	24.2817				% cells with PM targeting	30.2821				% cells with PM targeting	38.4975				% cells with PM targeting	40.4267
	time	0	1	2	3	4
repeat 1	% targ	36.0902	47.6923	55.5556	51.6129	63.5294
repeat 2	% targ	44.1667	55.631	43.2381	50.4545	42.7045
repeat 3	% targ	18.0495	24.2817	30.2821	38.4975	40.4267
average	% targ	32.7688	42.535	43.0252	46.855	48.8869
	stdev	13.3717	16.2985	12.6381	7.26094	12.7318
	N	3	3	3	3	3
	n	312	288	299	239	281

## Sheet: Figure 7a
	Cytosol and Membrane fraction (Cell fractionation)
Experiment 1	KO + ATG16L1 1-207	KO + ATG16L1 1-230	KO + ATG16L1 1-264	KO + ATG16L1 1-307	KO + ATG16L1 FL
Cytosol	90.193	89.613	89.971	62.877	76.909
Memebrane	9.807	10.387	10.029	37.123	23.093
Experiment 2
Cytosol	87.001	93.276	92.102	72.66	74.674
Memebrane	12.999	6.724	7.899	27.34	25.327

## Sheet: Figure 7(c-d)
Puncta quantification
Experiment 1	Number of cells	0 -700nm	700 - 2000nm	Experiment 2	Number of cells	0 -700nm	700 - 2000nm	Experiment 3	Number of cells	0 -700nm	700 - 2000nm
3HA ATG16L1 230	4	252	6	3HA ATG16L1 230	5	228	11	3HA ATG16L1 230	5	381	15
	2	214	5		3	190	6		4	203	12
	2	223	8		4	240	7		6	459	12
	3	129	5		1	174	1		4	330	12
	1	71	0		2	127	3		3	220	7
	3	296	12		1	160	4		3	180	7
	4	203	5		4	362	9		2	135	5
	5	340	14
					20	1481	41		27	1908	70
	24	1728	55			74.05	2.05			70.6667	2.59259
		72	2.29167
Experiment 1	Number of cells	0.1 -700nm	700 - 2000nm	Experiment 2	Number of cells	0.1 -700nm	700 - 2000nm	Experiment 3	Number of cells	0.1 -700nm	700 - 2000nm
3HA ATG16L1 264	5	444	17	3HA ATG16L1 264	5	383	14	3HA ATG16L1 264	4	281	6
	6	209	16		3	238	8		7	410	14
	7	512	19		4	268	9		4	259	10
	7	630	16		4	340	1		4	418	14
					4	297	12		7	654	18
	25	1795	68		5	329	11		3	220	6
		71.8	2.72		4	277	5
									29	2242	68
					29	2132	60			77.3103	2.34483
						73.5172	2.06897
Experiment 1	Number of cells	0.1 -700nm	700 - 2000nm	Experiment 2	Number of cells	0.1 -700nm	700 - 2000nm	Experiment 3	Number of cells	0.1 -700nm	700 - 2000nm
3HA ATG16L1 307	2	90	11	3HA ATG16L1 307	7	293	46	3HA ATG16L1 307	7	371	70
	4	206	65		4	180	53		1	48	8
	7	310	60		3	98	22		7	345	57
	4	211	27		7	240	44		6	302	29
	4	190	24		7	340	66		9	436	71
	3	68	26		3	154	39		4	184	30
	24	1075	213		31	1305	270		34	1686	265
		44.7917	8.875			42.0968	8.70968			49.5882	7.79412
Experiment 1	Number of cells	0.1 -700nm	700 - 2000nm	Experiment 2	Number of cells	0.1 -700nm	700 - 2000nm	Experiment 3	Number of cells	0.1-700nm	700 - 2000nm
3HA ATG16L1 FL	7	160	18	3HA ATG16L1 FL	3	150	6	3HA ATG16L1 FL	8	404	38
	3	220	19		7	440	29		1	57	4
	2	165	20		2	112	6		3	120	16
	4	132	15		2	102	12		5	201	21
	5	182	12		2	109	5		2	104	8
	4	196	16		2	101	19		2	92	7
	3	180	12		4	140	23		4	210	32
	3	201	11
					22	1154	100		25	1188	126
	31	1436	123			52.4545	4.54545			47.52	5.04
		46.3226	3.96774

## Sheet: Figure S4 (a)
Colocalisation analysis between LC3B and ATG9/ATG14/ULK1
	ATG14					ULK1		ATG9
Pearson's coefficient R	0.573333	0.45	0.527273	0.447	0.155	-0.195	0.014	-0.27	-0.121111

## Sheet: Figure S4(a)
Line profiles
	LC3B vs ATG9											LC3B vs ATG14											LC3B vs ULK1
	Line length (um)	GFP	Bkg GFP	GFP MINUS Bkg	RFP	Bkg RFP	RFP MINUS Bkg					Line length (um)	GFP	Bkg GFP	GFP MINUS Bkg	RFP	Bkg RFP	RFP MINUS Bkg					Line length (um)	GFP	Bkg GFP	GFP MINUS Bkg	RFP	Bkg RFP	RFP MINUS Bkg
	0	28	11	17	132	6.15	125.85					0	28	19.75	8.25	37	6.4	30.6					0	32	9.6	22.4	11	9.8	1.2
	0.101	33.314	11	22.314	110.994	6.15	104.844					0.0736	33	19.75	13.25	37	6.4	30.6					0.0995	41	9.6	31.4	24	9.8	14.2
	0.202	35.3	11	24.3	85.5	6.15	79.35					0.1471	37	19.75	17.25	49	6.4	42.6					0.199	45	9.6	35.4	27	9.8	17.2
	0.302	38.32	11	27.32	74.36	6.15	68.21					0.2207	39.828	19.75	20.078	55.914	6.4	49.514					0.2985	60	9.6	50.4	25	9.8	15.2
	0.403	36.36	11	25.36	65.08	6.15	58.93					0.2943	47.6	19.75	27.85	58.04	6.4	51.64					0.3981	81	9.6	71.4	19	9.8	9.2
	0.504	34.34	11	23.34	60.34	6.15	54.19					0.3678	41.6	19.75	21.85	60.7	6.4	54.3					0.4976	133	9.6	123.4	14	9.8	4.2
	0.605	34	11	23	58.68	6.15	52.53					0.4414	45	19.75	25.25	66	6.4	59.6					0.5971	100	9.6	90.4	14	9.8	4.2
	0.706	41.393	11	30.393	54.67	6.15	48.52					0.5149	46	19.75	26.25	72	6.4	65.6					0.6966	148	9.6	138.4	18	9.8	8.2
	0.807	42.181	11	31.181	53.642	6.15	47.492					0.5885	44.793	19.75	25.043	63.565	6.4	57.165					0.7961	163	9.6	153.4	20	9.8	10.2
	0.907	37.612	11	26.612	46.463	6.15	40.313					0.6621	45.98	19.75	26.23	62.34	6.4	55.94					0.8956	108	9.6	98.4	13	9.8	3.2
	1.008	38.86	11	27.86	58.95	6.15	52.8					0.7356	45.12	19.75	25.37	51.66	6.4	45.26					0.9951	95	9.6	85.4	20	9.8	10.2
	1.109	41.79	11	30.79	73.95	6.15	67.8					0.8092	42	19.75	22.25	44	6.4	37.6					1.0947	53	9.6	43.4	21	9.8	11.2
	1.21	45	11	34	67	6.15	60.85					0.8828	34	19.75	14.25	36	6.4	29.6					1.1942	43	9.6	33.4	22	9.8	12.2
	1.311	50	11	39	85	6.15	78.85					0.9563	33	19.75	13.25	33	6.4	26.6					1.2937	39	9.6	29.4	16	9.8	6.2
	1.411	51	11	40	61	6.15	54.85					1.0299	32.621	19.75	12.871	32.914	6.4	26.514					1.3932	39.621	9.6	30.021	16.2929	9.8	6.4929
	1.512	50.672	11	39.672	61.157	6.15	55.007					1.1034	33.64	19.75	13.89	37.28	6.4	30.88					1.4927	37.68	9.6	28.08	21.62	9.8	11.82
	1.613	46.889	11	35.889	59.81	6.15	53.66					1.177	36.32	19.75	16.57	40.66	6.4	34.26					1.5922	31.36	9.6	21.76	14.6	9.8	4.8
	1.714	38.717	11	27.717	66.549	6.15	60.399					1.2506	37	19.75	17.25	46.64	6.4	40.24					1.6917	47	9.6	37.4	24	9.8	14.2
	1.815	45.653	11	34.653	84.692	6.15	78.542					1.3241	37	19.75	17.25	47	6.4	40.6					1.7913	36	9.6	26.4	21	9.8	11.2
	1.916	46.714	11	35.714	104.492	6.15	98.342					1.3977	35.5	19.75	15.75	45.95	6.4	39.55					1.8908	48	9.6	38.4	25	9.8	15.2
	2.016	50.87	11	39.87	115.01	6.15	108.86					1.4713	37.96	19.75	18.21	51.9	6.4	45.5					1.9903	49.207	9.6	39.607	28.3787	9.8	18.5787
	2.117	60.3	11	49.3	114.27	6.15	108.12					1.5448	39.34	19.75	19.59	53.04	6.4	46.64					2.0898	62.54	9.6	52.94	28.38	9.8	18.58
	2.218	64.948	11	53.948	97.098	6.15	90.948					1.6184	39	19.75	19.25	48.952	6.4	42.552					2.1893	66.36	9.6	56.76	24.02	9.8	14.22
	2.319	64.48	11	53.48	89.82	6.15	83.67					1.6919	41.058	19.75	21.308	50.212	6.4	43.812					2.2888	56.42	9.6	46.82	21.02	9.8	11.22
	2.42	60.423	11	49.423	95.153	6.15	89.003					1.7655	44.849	19.75	25.099	56.463	6.4	50.063					2.3883	46.72	9.6	37.12	19.34	9.8	9.54
	2.52	62.881	11	51.881	64.824	6.15	58.674					1.8391	45	19.75	25.25	55.14	6.4	48.74					2.4879	29.9	9.6	20.3	21.82	9.8	12.02
	2.621	62.85	11	51.85	56.319	6.15	50.169					1.9126	53.37	19.75	33.62	49.42	6.4	43.02					2.5874	43	9.6	33.4	29	9.8	19.2
	2.722	61	11	50	54.58	6.15	48.43					1.9862	48.877	19.75	29.127	50.123	6.4	43.723					2.6869	38.515	9.6	28.915	27.7426	9.8	17.9426
	2.823	66.67	11	55.67	58.05	6.15	51.9					2.0598	47.76	19.75	28.01	42.94	6.4	36.54					2.7864	42.3	9.6	32.7	21.36	9.8	11.56
	2.924	61.631	11	50.631	56.962	6.15	50.812					2.1333	45.037	19.75	25.287	40.213	6.4	33.813					2.8859	35.957	9.6	26.357	22.8474	9.8	13.0474
	3.024	52.207	11	41.207	56.221	6.15	50.071					2.2069	44.7	19.75	24.95	43.45	6.4	37.05					2.9854	30.68	9.6	21.08	27.17	9.8	17.37
	3.125	47.5	11	36.5	64.6	6.15	58.45					2.2804	43.55	19.75	23.8	50.45	6.4	44.05					3.0849	35.63	9.6	26.03	25.84	9.8	16.04
	3.226	56.9	11	45.9	76.65	6.15	70.5					2.354	42.04	19.75	22.29	47.4	6.4	41					3.1845	49.7	9.6	40.1	16.18	9.8	6.38
	3.327	54.9	11	43.9	89.1	6.15	82.95					2.4276	42.03	19.75	22.28	49.85	6.4	43.45					3.284	51	9.6	41.4	26	9.8	16.2
	3.428	55.4	11	44.4	101.2	6.15	95.05					2.5011	42	19.75	22.25	57.76	6.4	51.36					3.3835	54	9.6	44.4	18	9.8	8.2
	3.529	61	11	50	129.26	6.15	123.11					2.5747	46	19.75	26.25	62	6.4	55.6					3.483	44.757	9.6	35.157	14.3431	9.8	4.5431
	3.629	59.463	11	48.463	125.755	6.15	119.605					2.6483	49	19.75	29.25	61	6.4	54.6					3.5825	34.7	9.6	25.1	14.66	9.8	4.86
	3.73	58.71	11	47.71	110.97	6.15	104.82					2.7218	50	19.75	30.25	76	6.4	69.6					3.682	29.24	9.6	19.64	13.12	9.8	3.32
	3.831	50.44	11	39.44	97.36	6.15	91.21					2.7954	49.586	19.75	29.836	74.343	6.4	67.943					3.7815	32	9.6	22.4	11	9.8	1.2
	3.932	57.82	11	46.82	75.44	6.15	69.29					2.8689	50	19.75	30.25	76.66	6.4	70.26					3.8811	27	9.6	17.4	10	9.8	0.2
	4.033	58	11	47	55.4	6.15	49.25					2.9425	51.32	19.75	31.57	81.62	6.4	75.22					3.9806	41	9.6	31.4	10	9.8	0.2
	4.133	51	11	40	50	6.15	43.85					3.0161	46.36	19.75	26.61	74.6	6.4	68.2					4.0801	42.257	9.6	32.657	12.2426	9.8	2.4426
	4.234	46	11	35	66	6.15	59.85					3.0896	46	19.75	26.25	76	6.4	69.6					4.1796	42.7	9.6	33.1	9.36	9.8	-0.44
	4.335	52	11	41	57	6.15	50.85					3.1632	47	19.75	27.25	88	6.4	81.6					4.2791	36.3	9.6	26.7	8	9.8	-1.8
	4.436	50	11	39	71	6.15	64.85					3.2368	48	19.75	28.25	84	6.4	77.6					4.3786	34.12	9.6	24.52	10.82	9.8	1.02
	4.537	53	11	42	89	6.15	82.85					3.3103	56	19.75	36.25	90	6.4	83.6					4.4781	33	9.6	23.4	11	9.8	1.2
	4.638	55	11	44	106	6.15	99.85					3.3839	60	19.75	40.25	79	6.4	72.6					4.5777	39	9.6	29.4	12	9.8	2.2
	4.738	59	11	48	102	6.15	95.85					3.4574	58	19.75	38.25	88	6.4	81.6					4.6772	28	9.6	18.4	30	9.8	20.2
	4.839	58.464	11	47.464	89.944	6.15	83.794					3.531	65	19.75	45.25	87	6.4	80.6					4.7767	34	9.6	24.4	33	9.8	23.2
	4.94	62.851	11	51.851	100.729	6.15	94.579					3.6046	74	19.75	54.25	75	6.4	68.6					4.8762	27	9.6	17.4	25	9.8	15.2
	5.041	67.08	11	56.08	104.48	6.15	98.33					3.6781	77.343	19.75	57.593	96.092	6.4	89.692					4.9757	31	9.6	21.4	53	9.8	43.2
	5.142	66.177	11	55.177	78.991	6.15	72.841					3.7517	82.68	19.75	62.93	105.34	6.4	98.94					5.0752	28	9.6	18.4	34	9.8	24.2
	5.242	75.618	11	64.618	57.402	6.15	51.252					3.8253	83.88	19.75	64.13	122.86	6.4	116.46					5.1747	25.879	9.6	16.279	31	9.8	21.2
	5.343	70.63	11	59.63	48.63	6.15	42.48					3.8988	76	19.75	56.25	113	6.4	106.6					5.2743	27.64	9.6	18.04	20.08	9.8	10.28
	5.444	70.729	11	59.729	63.332	6.15	57.182					3.9724	66	19.75	46.25	116	6.4	109.6					5.3738	29.94	9.6	20.34	13.18	9.8	3.38
	5.545	70.6	11	59.6	72	6.15	65.85					4.0459	54	19.75	34.25	104	6.4	97.6					5.4733	28	9.6	18.4	15	9.8	5.2
	5.646	77.8	11	66.8	70.2	6.15	64.05					4.1195	46	19.75	26.25	78	6.4	71.6					5.5728	30	9.6	20.4	12	9.8	2.2
	5.747	64.541	11	53.541	58.616	6.15	52.466					4.1931	49	19.75	29.25	71	6.4	64.6					5.6723	23	9.6	13.4	8	9.8	-1.8
	5.847	51.801	11	40.801	50.809	6.15	44.659					4.2666	49	19.75	29.25	66	6.4	59.6					5.7718	19.464	9.6	9.864	13.3787	9.8	3.5787
	5.948	53.074	11	42.074	51.264	6.15	45.114					4.3402	44.672	19.75	24.922	57.565	6.4	51.165					5.8713	17.826	9.6	8.226	17.8834	9.8	8.0834
	6.049	57.56	11	46.56	51	6.15	44.85					4.4138	43.98	19.75	24.23	54.36	6.4	47.96					5.9709	17.92	9.6	8.32	23.7	9.8	13.9
	6.15	69.57	11	58.57	49.22	6.15	43.07					4.4873	49.7	19.75	29.95	56.76	6.4	50.36					6.0704	21.64	9.6	12.04	19.2	9.8	9.4
	6.251	72.78	11	61.78	50.78	6.15	44.63					4.5609	65	19.75	45.25	64	6.4	57.6					6.1699	25.72	9.6	16.12	21.93	9.8	12.13
	6.351	67.701	11	56.701	59.261	6.15	53.111					4.6344	84	19.75	64.25	72	6.4	65.6					6.2694	42	9.6	32.4	36	9.8	26.2
	6.452	67.959	11	56.959	72.312	6.15	66.162					4.708	92	19.75	72.25	74	6.4	67.6					6.3689	59.971	9.6	50.371	16.5797	9.8	6.7797
	6.553	73	11	62	70.3	6.15	64.15					4.7816	86	19.75	66.25	62	6.4	55.6					6.4684	58.927	9.6	49.327	14.4124	9.8	4.6124
	6.654	71.96	11	60.96	80.56	6.15	74.41					4.8551	103.006	19.75	83.256	70.536	6.4	64.136					6.5679	45.47	9.6	35.87	12.31	9.8	2.51
	6.755	65.26	11	54.26	90.35	6.15	84.2					4.9287	92.82	19.75	73.07	75.02	6.4	68.62					6.6675	28.68	9.6	19.08	11.92	9.8	2.12
	6.855	67.13	11	56.13	84.05	6.15	77.9					5.0023	71.8	19.75	52.05	67.4	6.4	61					6.767	20.28	9.6	10.68	13.93	9.8	4.13
	6.956	68.65	11	57.65	68.79	6.15	62.64					5.0758	65.94	19.75	46.19	81.86	6.4	75.46					6.8665	20	9.6	10.4	15.86	9.8	6.06
	7.057	70.55	11	59.55	64.78	6.15	58.63					5.1494	58	19.75	38.25	75	6.4	68.6					6.966	18	9.6	8.4	17	9.8	7.2
	7.158	70.58	11	59.58	69.98	6.15	63.83					5.2229	63	19.75	43.25	61	6.4	54.6					7.0655	22	9.6	12.4	20	9.8	10.2
	7.259	77.88	11	66.88	64.7	6.15	58.55					5.2965	55	19.75	35.25	69	6.4	62.6					7.165	31.071	9.6	21.471	21.4645	9.8	11.6645
	7.36	76.42	11	65.42	45.08	6.15	38.93					5.3701	51	19.75	31.25	59	6.4	52.6					7.2645	42.6	9.6	33	19.06	9.8	9.26
	7.46	86.89	11	75.89	40.02	6.15	33.87					5.4436	54	19.75	34.25	59	6.4	52.6					7.3641	55.991	9.6	46.391	20.5454	9.8	10.7454
	7.561	89.52	11	78.52	38.88	6.15	32.73					5.5172	56	19.75	36.25	79	6.4	72.6					7.4636	78.34	9.6	68.74	17.05	9.8	7.25
	7.662	88.7	11	77.7	36.4	6.15	30.25					5.5908	58	19.75	38.25	70	6.4	63.6					7.5631	90.307	9.6	80.707	15.4438	9.8	5.6438
	7.763	84.75	11	73.75	36.3	6.15	30.15					5.6643	63	19.75	43.25	67	6.4	60.6					7.6626	108.92	9.6	99.32	11.32	9.8	1.52
	7.864	83.65	11	72.65	46.1	6.15	39.95					5.7379	64	19.75	44.25	57	6.4	50.6					7.7621	101.72	9.6	92.12	14.62	9.8	4.82
	7.964	80.973	11	69.973	45.835	6.15	39.685					5.8114	58	19.75	38.25	76	6.4	69.6					7.8616	89.22	9.6	79.62	12.44	9.8	2.64
	8.065	79.48	11	68.48	32.24	6.15	26.09					5.885	60	19.75	40.25	70	6.4	63.6					7.9611	50.7	9.6	41.1	10.44	9.8	0.64
	8.166	78.9	11	67.9	31.38	6.15	25.23					5.9586	64	19.75	44.25	68	6.4	61.6					8.0607	53.78	9.6	44.18	15.88	9.8	6.08
	8.267	84.34	11	73.34	28.88	6.15	22.73					6.0321	57	19.75	37.25	79	6.4	72.6					8.1602	44	9.6	34.4	15	9.8	5.2
	8.368	83.04	11	72.04	31.92	6.15	25.77					6.1057	60	19.75	40.25	66	6.4	59.6					8.2597	47	9.6	37.4	25	9.8	15.2
	8.469	92	11	81	41	6.15	34.85					6.1793	59.964	19.75	40.214	68.5	6.4	62.1					8.3592	50.914	9.6	41.314	29.6213	9.8	19.8213
	8.569	85.308	11	74.308	50.642	6.15	44.492					6.2528	64.64	19.75	44.89	62.42	6.4	56.02					8.4587	61.26	9.6	51.66	29.7	9.8	19.9
	8.67	87.285	11	76.285	52.098	6.15	45.948					6.3264	60.36	19.75	40.61	58	6.4	51.6					8.5582	68.96	9.6	59.36	25.36	9.8	15.56
	8.771	89.147	11	78.147	52.612	6.15	46.462					6.3999	55	19.75	35.25	59	6.4	52.6					8.6577	71	9.6	61.4	26.82	9.8	17.02
	8.872	93.649	11	82.649	45.032	6.15	38.882					6.4735	60	19.75	40.25	59	6.4	52.6					8.7573	91	9.6	81.4	39	9.8	29.2
	8.973	97.043	11	86.043	40.286	6.15	34.136					6.5471	66.864	19.75	47.114	68.45	6.4	62.05					8.8568	93	9.6	83.4	43	9.8	33.2
	9.073	94.687	11	83.687	50.266	6.15	44.116					6.6206	85.18	19.75	65.43	75.66	6.4	69.26					8.9563	119	9.6	109.4	37	9.8	27.2
	9.174	93.008	11	82.008	57.512	6.15	51.362					6.6942	116.362	19.75	96.612	84.326	6.4	77.926					9.0558	123	9.6	113.4	31	9.8	21.2
	9.275	90.335	11	79.335	57.971	6.15	51.821					6.7678	153.8	19.75	134.05	93.66	6.4	87.26					9.1553	86.21	9.6	76.61	24.0503	9.8	14.2503
	9.376	92.575	11	81.575	58.476	6.15	52.326					6.8413	163.27	19.75	143.52	87.66	6.4	81.26					9.2548	70.74	9.6	61.14	13.4	9.8	3.6
	9.477	98.215	11	87.215	46.61	6.15	40.46					6.9149	145.59	19.75	125.84	84.885	6.4	78.485					9.3543	62.38	9.6	52.78	14.62	9.8	4.82
	9.578	104.236	11	93.236	44.472	6.15	38.322					6.9884	127.44	19.75	107.69	89.36	6.4	82.96					9.4539	64.7	9.6	55.1	13.24	9.8	3.44
	9.678	104.897	11	93.897	43.513	6.15	37.363					7.062	95.72	19.75	75.97	86.94	6.4	80.54					9.5534	70	9.6	60.4	22	9.8	12.2
	9.779	103.868	11	92.868	47.522	6.15	41.372					7.1356	77.96	19.75	58.21	105.92	6.4	99.52					9.6529	63	9.6	53.4	19	9.8	9.2
	9.88	100.93	11	89.93	45.93	6.15	39.78					7.2091	67.506	19.75	47.756	102.544	6.4	96.144					9.7524	69	9.6	59.4	18	9.8	8.2
	9.981	100.83	11	89.83	48.62	6.15	42.47					7.2827	68	19.75	48.25	95	6.4	88.6					9.8519	54	9.6	44.4	17	9.8	7.2
	10.082	96.428	11	85.428	45.384	6.15	39.234					7.3563	76.22	19.75	56.47	109.4	6.4	103					9.9514	49	9.6	39.4	16	9.8	6.2
	10.182	110.167	11	99.167	41.685	6.15	35.535					7.4298	83.93	19.75	64.18	100.12	6.4	93.72					10.0509	48.864	9.6	39.264	14.636	9.8	4.836
	10.283	146.617	11	135.617	52.471	6.15	46.321					7.5034	91.92	19.75	72.17	87.13	6.4	80.73					10.1505	37.08	9.6	27.48	14.36	9.8	4.56
	10.384	195.431	11	184.431	64.588	6.15	58.438					7.577	103	19.75	83.25	101	6.4	94.6					10.25	37.729	9.6	28.129	17.0292	9.8	7.2292
	10.485	194.21	11	183.21	68.34	6.15	62.19					7.6505	103	19.75	83.25	81	6.4	74.6					10.3495	53.24	9.6	43.64	13.44	9.8	3.64
	10.586	166.3	11	155.3	71.67	6.15	65.52					7.7241	83.665	19.75	63.915	82.828	6.4	76.428					10.449	64.56	9.6	54.96	10.61	9.8	0.81
	10.686	143.42	11	132.42	65.77	6.15	59.62					7.7976	72.06	19.75	52.31	81.68	6.4	75.28					10.5485	88.33	9.6	78.73	9.21	9.8	-0.59
	10.787	111.63	11	100.63	51.65	6.15	45.5					7.8712	70.316	19.75	50.566	79.052	6.4	72.652					10.648	101.84	9.6	92.24	9.98	9.8	0.18
	10.888	122.85	11	111.85	69.8	6.15	63.65					7.9448	70.27	19.75	50.52	79.71	6.4	73.31					10.7475	110.82	9.6	101.22	10	9.8	0.2
	10.989	107	11	96	58	6.15	51.85					8.0183	70.74	19.75	50.99	72.21	6.4	65.81					10.8471	117.091	9.6	107.491	16.5801	9.8	6.7801
	11.09	97	11	86	45	6.15	38.85					8.0919	65.14	19.75	45.39	70.04	6.4	63.64					10.9466	113.65	9.6	104.05	16.35	9.8	6.55
	11.191	113	11	102	57	6.15	50.85					8.1655	63	19.75	43.25	83	6.4	76.6					11.0461	81	9.6	71.4	16	9.8	6.2
	11.291	118	11	107	63	6.15	56.85					8.239	69	19.75	49.25	71	6.4	64.6					11.1456	54.65	9.6	45.05	21.2	9.8	11.4
	11.392	119.757	11	108.757	37.387	6.15	31.237					8.3126	67	19.75	47.25	58	6.4	51.6					11.2451	68.68	9.6	59.08	24	9.8	14.2
	11.493	114.76	11	103.76	28.02	6.15	21.87					8.3861	80	19.75	60.25	64	6.4	57.6					11.3446	57	9.6	47.4	46	9.8	36.2
	11.594	94.82	11	83.82	23.04	6.15	16.89					8.4597	76	19.75	56.25	64	6.4	57.6					11.4441	63	9.6	53.4	36	9.8	26.2
	11.695	88.498	11	77.498	25.629	6.15	19.479					8.5333	68.393	19.75	48.643	65.914	6.4	59.514					11.5437	60.243	9.6	50.643	32.0503	9.8	22.2503
	11.795	80.76	11	69.76	30.95	6.15	24.8					8.6068	64.36	19.75	44.61	68.32	6.4	61.92					11.6432	52.36	9.6	42.76	25.72	9.8	15.92
	11.896	75.654	11	64.654	39.763	6.15	33.613					8.6804	67.7	19.75	47.95	79.34	6.4	72.94					11.7427	51	9.6	41.4	22.34	9.8	12.54
	11.997	81	11	70	45.28	6.15	39.13					8.754	71	19.75	51.25	88	6.4	81.6					11.8422	41.76	9.6	32.16	20.02	9.8	10.22
	12.098	64.84	11	53.84	35.48	6.15	29.33					8.8275	68	19.75	48.25	94	6.4	87.6					11.9417	39.82	9.6	30.22	17.12	9.8	7.32
	12.199	61.18	11	50.18	23.64	6.15	17.49					8.9011	90	19.75	70.25	97	6.4	90.6					12.0412	42	9.6	32.4	11	9.8	1.2
	12.3	58.736	11	47.736	18.958	6.15	12.808					8.9746	92	19.75	72.25	91	6.4	84.6					12.1407	53	9.6	43.4	15	9.8	5.2
	12.4	55.097	11	44.097	20.585	6.15	14.435					9.0482	95	19.75	75.25	104	6.4	97.6					12.2403	53	9.6	43.4	14	9.8	4.2
	12.501	49.05	11	38.05	29.18	6.15	23.03					9.1218	102	19.75	82.25	105	6.4	98.6					12.3398	55.207	9.6	45.607	18.9497	9.8	9.1497
	12.602	53.9	11	42.9	48.2	6.15	42.05					9.1953	106.071	19.75	86.321	109.707	6.4	103.307					12.4393	51.06	9.6	41.46	26.28	9.8	16.48
	12.703	51.71	11	40.71	54.7	6.15	48.55					9.2689	108.64	19.75	88.89	117.96	6.4	111.56					12.5388	45.36	9.6	35.76	34.94	9.8	25.14
	12.804	49.781	11	38.781	43.402	6.15	37.252					9.3425	102.48	19.75	82.73	125.64	6.4	119.24					12.6383	42.02	9.6	32.42	34.04	9.8	24.24
	12.904	45.21	11	34.21	28.87	6.15	22.72					9.416	105	19.75	85.25	117	6.4	110.6					12.7378	44.76	9.6	35.16	31.06	9.8	21.26
	13.005	61.192	11	50.192	27.61	6.15	21.46					9.4896	101.672	19.75	81.922	114.5	6.4	108.1					12.8373	33	9.6	23.4	31	9.8	21.2
	13.106	62.94	11	51.94	24.149	6.15	17.999					9.5631	100	19.75	80.25	106.72	6.4	100.32					12.9369	27	9.6	17.4	22	9.8	12.2
	13.207	79.01	11	68.01	18.14	6.15	11.99					9.6367	100	19.75	80.25	98.36	6.4	91.96					13.0364	36	9.6	26.4	20	9.8	10.2
	13.308	84.355	11	73.355	19.503	6.15	13.353					9.7103	84.605	19.75	64.855	79.84	6.4	73.44					13.1359	30	9.6	20.4	17	9.8	7.2
	13.409	79.292	11	68.292	30.776	6.15	24.626					9.7838	78.923	19.75	59.173	69.432	6.4	63.032					13.2354	29	9.6	19.4	9	9.8	-0.8
	13.509	68.18	11	57.18	38.24	6.15	32.09					9.8574	75.199	19.75	55.449	64.436	6.4	58.036					13.3349	25	9.6	15.4	15	9.8	5.2
	13.61	59.359	11	48.359	35.097	6.15	28.947					9.931	78.631	19.75	58.881	64.132	6.4	57.732					13.4344	28	9.6	18.4	12	9.8	2.2
	13.711	53.95	11	42.95	34.5	6.15	28.35					10.0045	64.57	19.75	44.82	60.63	6.4	54.23					13.5339	38	9.6	28.4	19	9.8	9.2
	13.812	51.3	11	40.3	39.6	6.15	33.45					10.0781	66.88	19.75	47.13	62.94	6.4	56.54					13.6335	53	9.6	43.4	21	9.8	11.2
	13.913	51.4	11	40.4	34.2	6.15	28.05					10.1516	56	19.75	36.25	67	6.4	60.6					13.733	42	9.6	32.4	24	9.8	14.2
	14.013	60.3	11	49.3	27.6	6.15	21.45					10.2252	50.929	19.75	31.179	55.029	6.4	48.629					13.8325	27	9.6	17.4	17	9.8	7.2
	14.114	79.7	11	68.7	28.85	6.15	22.7					10.2988	49.027	19.75	29.277	55.191	6.4	48.791					13.932	31	9.6	21.4	11	9.8	1.2
	14.215	90.15	11	79.15	40.9	6.15	34.75					10.3723	51.706	19.75	31.956	61.819	6.4	55.419					14.0315	38	9.6	28.4	23	9.8	13.2
	14.316	82.3	11	71.3	52.1	6.15	45.95					10.4459	67.671	19.75	47.921	82.544	6.4	76.144					14.131	40	9.6	30.4	20	9.8	10.2
	14.417	77.5	11	66.5	67.55	6.15	61.4					10.5195	71.36	19.75	51.61	88.36	6.4	81.96					14.2305	34	9.6	24.4	13	9.8	3.2
	14.518	64.35	11	53.35	98.1	6.15	91.95					10.593	96.48	19.75	76.73	121.32	6.4	114.92					14.3301	29	9.6	19.4	17	9.8	7.2
	14.618	50.6	11	39.6	111.5	6.15	105.35					10.6666	91	19.75	71.25	108	6.4	101.6					14.4296	22	9.6	12.4	18	9.8	8.2
	14.719	45.55	11	34.55	85.4	6.15	79.25					10.7401	82.015	19.75	62.265	108.172	6.4	101.772					14.5291	23	9.6	13.4	20	9.8	10.2
	14.82	43.155	11	32.155	45.524	6.15	39.374					10.8137	64.8	19.75	45.05	121.88	6.4	115.48					14.6286	18	9.6	8.4	28	9.8	18.2
	14.921	45.98	11	34.98	31.98	6.15	25.83					10.8873	50.48	19.75	30.73	111.08	6.4	104.68					14.7281	20	9.6	10.4	26	9.8	16.2
	15.022	45.213	11	34.213	31.095	6.15	24.945					10.9608	44.981	19.75	25.231	106.824	6.4	100.424					14.8276	29	9.6	19.4	25	9.8	15.2
	15.122	51.909	11	40.909	36.775	6.15	30.625					11.0344	47.3	19.75	27.55	98.07	6.4	91.67					14.9271	27	9.6	17.4	22	9.8	12.2
	15.223	73.56	11	62.56	36.314	6.15	30.164					11.108	47.28	19.75	27.53	93.07	6.4	86.67					15.0267	20.772	9.6	11.172	16	9.8	6.2
	15.324	99.266	11	88.266	37.613	6.15	31.463					11.1815	50.349	19.75	30.599	88.036	6.4	81.636					15.1262	20.02	9.6	10.42	11.98	9.8	2.18
	15.425	111.6	11	100.6	55.2	6.15	49.05					11.2551	50.38	19.75	30.63	79.52	6.4	73.12					15.2257	19	9.6	9.4	13.66	9.8	3.86
	15.526	74.3	11	63.3	68.32	6.15	62.17					11.3286	47.763	19.75	28.013	81.63	6.4	75.23					15.3252	14.38	9.6	4.78	15.98	9.8	6.18
	15.626	58.54	11	47.54	92.36	6.15	86.21					11.4022	51.45	19.75	31.7	87.65	6.4	81.25					15.4247	17.28	9.6	7.68	24.26	9.8	14.46
	15.727	47.54	11	36.54	74.5	6.15	68.35					11.4758	57.52	19.75	37.77	96.12	6.4	89.72					15.5242	17.669	9.6	8.069	23.8705	9.8	14.0705
	15.828	41.7	11	30.7	49.5	6.15	43.35					11.5493	53.15	19.75	33.4	82.51	6.4	76.11					15.6237	15	9.6	5.4	21.17	9.8	11.37
	15.929	41.81	11	30.81	39.52	6.15	33.37					11.6229	69.49	19.75	49.74	71.33	6.4	64.93					15.7233	15	9.6	5.4	21.44	9.8	11.64
	16.03	56.68	11	45.68	32.86	6.15	26.71					11.6965	67	19.75	47.25	80	6.4	73.6					15.8228	15.39	9.6	5.79	17.05	9.8	7.25
	16.131	77.83	11	66.83	30.29	6.15	24.14					11.77	64	19.75	44.25	74	6.4	67.6					15.9223	16.78	9.6	7.18	14	9.8	4.2
	16.231	80.981	11	69.981	30.342	6.15	24.192					11.8436	61	19.75	41.25	84	6.4	77.6					16.0218	17.89	9.6	8.29	14.5542	9.8	4.7542
	16.332	76.4	11	65.4	33.6	6.15	27.45					11.9171	55	19.75	35.25	108	6.4	101.6					16.1213	16.92	9.6	7.32	14.52	9.8	4.72
	16.433	95.454	11	84.454	36.391	6.15	30.241					11.9907	59	19.75	39.25	128	6.4	121.6					16.2208	15.92	9.6	6.32	9.56	9.8	-0.24
	16.534	146.16	11	135.16	44.061	6.15	37.911					12.0643	71	19.75	51.25	145	6.4	138.6					16.3203	15.16	9.6	5.56	15.92	9.8	6.12
	16.635	175.871	11	164.871	52.399	6.15	46.249					12.1378	67	19.75	47.25	154	6.4	147.6					16.4199	17	9.6	7.4	14.84	9.8	5.04
	16.735	165.503	11	154.503	41.905	6.15	35.755					12.2114	59	19.75	39.25	142	6.4	135.6					16.5194	17.24	9.6	7.64	13.16	9.8	3.36
	16.836	128.374	11	117.374	32.627	6.15	26.477					12.285	65	19.75	45.25	141	6.4	134.6					16.6189	22.24	9.6	12.64	15.48	9.8	5.68
	16.937	106.079	11	95.079	27.352	6.15	21.202					12.3585	67	19.75	47.25	126	6.4	119.6					16.7184	50.48	9.6	40.88	20.36	9.8	10.56
	17.038	101.16	11	90.16	31.76	6.15	25.61					12.4321	61	19.75	41.25	122	6.4	115.6					16.8179	80.6	9.6	71	13.08	9.8	3.28
	17.139	106.6	11	95.6	44.72	6.15	38.57					12.5056	64	19.75	44.25	109	6.4	102.6					16.9174	99.8	9.6	90.2	13.84	9.8	4.04
	17.24	109.476	11	98.476	54.45	6.15	48.3					12.5792	62	19.75	42.25	97	6.4	90.6					17.0169	106.52	9.6	96.92	12.08	9.8	2.28
	17.34	92.379	11	81.379	60.679	6.15	54.529					12.6528	49	19.75	29.25	66	6.4	59.6					17.1165	75.28	9.6	65.68	12.76	9.8	2.96
	17.441	67.573	11	56.573	63.046	6.15	56.896					12.7263	45	19.75	25.25	53	6.4	46.6					17.216	41.34	9.6	31.74	9.24	9.8	-0.56
	17.542	70.53	11	59.53	74.06	6.15	67.91					12.7999	45.121	19.75	25.371	58.95	6.4	52.55					17.3155	24.52	9.6	14.92	8.78	9.8	-1.02
	17.643	88.59	11	77.59	80.16	6.15	74.01					12.8735	41.36	19.75	21.61	69.26	6.4	62.86					17.415	21.98	9.6	12.38	15.86	9.8	6.06
	17.744	78.133	11	67.133	74.131	6.15	67.981					12.947	35.571	19.75	15.821	68.887	6.4	62.487					17.5145	22	9.6	12.4	16	9.8	6.2
	17.844	59.29	11	48.29	57.82	6.15	51.67					13.0206	30.17	19.75	10.42	64.83	6.4	58.43					17.614	22	9.6	12.4	20.9	9.8	11.1
	17.945	46.29	11	35.29	47.121	6.15	40.971					13.0941	39.9	19.75	20.15	54.31	6.4	47.91					17.7135	21.65	9.6	12.05	29.3304	9.8	19.5304
	18.046	46.69	11	35.69	42.15	6.15	36					13.1677	40.04	19.75	20.29	43.18	6.4	36.78					17.8131	21.7	9.6	12.1	52.15	9.8	42.35
	18.147	45.892	11	34.892	44.68	6.15	38.53					13.2413	54	19.75	34.25	40	6.4	33.6					17.9126	21.65	9.6	12.05	68.85	9.8	59.05
	18.248	40.982	11	29.982	35.615	6.15	29.465					13.3148	37	19.75	17.25	43	6.4	36.6					18.0121	20.05	9.6	10.45	64.85	9.8	55.05
	18.349	41	11	30	41.28	6.15	35.13					13.3884	46	19.75	26.25	42	6.4	35.6					18.1116	15.75	9.6	6.15	44.75	9.8	34.95
	18.449	38	11	27	31	6.15	24.85					13.462	32	19.75	12.25	41	6.4	34.6					18.2111	19.85	9.6	10.25	39.25	9.8	29.45
	18.55	36	11	25	41	6.15	34.85					13.5355	33.586	19.75	13.836	43.45	6.4	37.05					18.3106	14.891	9.6	5.291	39.4541	9.8	29.6541
	18.651	34	11	23	62	6.15	55.85					13.6091	39.3	19.75	19.55	56.86	6.4	50.46					18.4101	11.38	9.6	1.78	32.96	9.8	23.16
	18.752	42	11	31	62	6.15	55.85					13.6826	45.7	19.75	25.95	58.36	6.4	51.96					18.5097	12.78	9.6	3.18	19.42	9.8	9.62
	18.853	38.086	11	27.086	54.636	6.15	48.486					13.7562	49	19.75	29.25	69	6.4	62.6					18.6092	18.88	9.6	9.28	25.82	9.8	16.02
	18.953	40.18	11	29.18	39.912	6.15	33.762					13.8298	56	19.75	36.25	63	6.4	56.6					18.7087	21	9.6	11.4	34	9.8	24.2
	19.054	46.39	11	35.39	32.46	6.15	26.31					13.9033	46	19.75	26.25	73	6.4	66.6					18.8082	21.086	9.6	11.486	48.4497	9.8	38.6497
	19.155	41	11	30	35.61	6.15	29.46					13.9769	51	19.75	31.25	82	6.4	75.6					18.9077	22.66	9.6	13.06	51.42	9.8	41.62
	19.256	43.07	11	32.07	42.15	6.15	36					14.0505	53	19.75	33.25	76	6.4	69.6					19.0072	21.68	9.6	12.08	29.18	9.8	19.38
	19.357	51.84	11	40.84	47.15	6.15	41					14.124	67	19.75	47.25	95	6.4	88.6					19.1067	23.82	9.6	14.22	33.16	9.8	23.36
	19.457	60.802	11	49.802	50.022	6.15	43.872					14.1976	53	19.75	33.25	94	6.4	87.6					19.2063	23.06	9.6	13.46	28.36	9.8	18.56
	19.558	78.85	11	67.85	50.519	6.15	44.369					14.2711	71	19.75	51.25	107	6.4	100.6					19.3058	19	9.6	9.4	25	9.8	15.2
	19.659	92.92	11	81.92	78.3	6.15	72.15					14.3447	44	19.75	24.25	114	6.4	107.6					19.4053	15	9.6	5.4	26	9.8	16.2
	19.76	90.36	11	79.36	120.13	6.15	113.98					14.4183	58	19.75	38.25	121	6.4	114.6					19.5048	23.278	9.6	13.678	24.3787	9.8	14.5787
	19.861	99.1	11	88.1	144.02	6.15	137.87					14.4918	50	19.75	30.25	111	6.4	104.6					19.6043	38.541	9.6	28.941	24.9008	9.8	15.1008
	19.962	100.91	11	89.91	97.77	6.15	91.62					14.5654	48.379	19.75	28.629	115.722	6.4	109.322					19.7038	46.09	9.6	36.49	19.61	9.8	9.81
	20.062	116.575	11	105.575	65.92	6.15	59.77					14.639	45.36	19.75	25.61	121.7	6.4	115.3					19.8033	24.68	9.6	15.08	22.44	9.8	12.64
	20.163	120.4	11	109.4	44.2	6.15	38.05					14.7125	59.98	19.75	40.23	157.6	6.4	151.2					19.9029	18.14	9.6	8.54	20.07	9.8	10.27
	20.264	135.48	11	124.48	36.56	6.15	30.41					14.7861	57.289	19.75	37.539	158.741	6.4	152.341					20.0024	16	9.6	6.4	19	9.8	9.2
	20.365	108	11	97	33	6.15	26.85					14.8596	41.29	19.75	21.54	126.72	6.4	120.32					20.1019	17	9.6	7.4	19	9.8	9.2
	20.466	95	11	84	39	6.15	32.85					14.9332	39.65	19.75	19.9	137.62	6.4	131.22					20.2014	17	9.6	7.4	12	9.8	2.2
	20.566	74	11	63	32	6.15	25.85					15.0068	35	19.75	15.25	114	6.4	107.6					20.3009	11	9.6	1.4	14	9.8	4.2
	20.667	64	11	53	35	6.15	28.85					15.0803	44	19.75	24.25	129	6.4	122.6					20.4004	11.379	9.6	1.779	18.5355	9.8	8.7355
	20.768	62	11	51	27	6.15	20.85					15.1539	37	19.75	17.25	121	6.4	114.6					20.4999	14.32	9.6	4.72	24.3	9.8	14.5
	20.869	56	11	45	33	6.15	26.85					15.2275	55	19.75	35.25	131	6.4	124.6					20.5995	13.02	9.6	3.42	29.3	9.8	19.5
	20.97	66	11	55	32	6.15	25.85					15.301	42	19.75	22.25	121	6.4	114.6					20.699	13.32	9.6	3.72	28.36	9.8	18.56
	21.071	65	11	54	40	6.15	33.85					15.3746	55	19.75	35.25	127	6.4	120.6					20.7985	12.951	9.6	3.351	24.4358	9.8	14.6358
	21.171	59	11	48	48	6.15	41.85					15.4482	52	19.75	32.25	137	6.4	130.6					20.898	11.78	9.6	2.18	24.17	9.8	14.37
	21.272	77.249	11	66.249	47.793	6.15	41.643					15.5217	70	19.75	50.25	130	6.4	123.6					20.9975	10.63	9.6	1.03	22.84	9.8	13.04
	21.373	96.84	11	85.84	48	6.15	41.85					15.5953	59	19.75	39.25	123	6.4	116.6					21.097	12.94	9.6	3.34	22	9.8	12.2
	21.474	141.96	11	130.96	44.04	6.15	37.89					15.6688	67	19.75	47.25	114	6.4	107.6					21.1965	9	9.6	-0.6	25	9.8	15.2
	21.575	157.24	11	146.24	42	6.15	35.85					15.7424	58.515	19.75	38.765	94.302	6.4	87.902					21.2961	13	9.6	3.4	16	9.8	6.2
	21.675	155	11	144	40	6.15	33.85					15.816	47.74	19.75	27.99	95.3	6.4	88.9					21.3956	12	9.6	2.4	30	9.8	20.2
	21.776	132	11	121	46	6.15	39.85					15.8895	49.64	19.75	29.89	97	6.4	90.6					21.4951	10.879	9.6	1.279	23.8431	9.8	14.0431
	21.877	101	11	90	48	6.15	41.85					15.9631	38.752	19.75	19.002	108.49	6.4	102.09					21.5946	11.66	9.6	2.06	21.66	9.8	11.86
	21.978	65	11	54	35	6.15	28.85					16.0367	34.11	19.75	14.36	102.55	6.4	96.15					21.6941	15.76	9.6	6.16	18.24	9.8	8.44
	22.079	52	11	41	38	6.15	31.85					16.1102	36.72	19.75	16.97	85.84	6.4	79.44					21.7936	17	9.6	7.4	19	9.8	9.2
	22.18	46.257	11	35.257	35.964	6.15	29.814					16.1838	32	19.75	12.25	63	6.4	56.6					21.8931	17	9.6	7.4	16	9.8	6.2
	22.28	39.04	11	28.04	36	6.15	29.85					16.2573	32	19.75	12.25	73	6.4	66.6					21.9927	13	9.6	3.4	14	9.8	4.2
	22.381	42.94	11	31.94	50.52	6.15	44.37					16.3309	36.95	19.75	17.2	57.08	6.4	50.68					22.0922	11	9.6	1.4	19	9.8	9.2
	22.482	44.68	11	33.68	56.02	6.15	49.87					16.4045	39	19.75	19.25	60.6	6.4	54.2					22.1917	14	9.6	4.4	22	9.8	12.2
	22.583	42.917	11	31.917	49.588	6.15	43.438					16.478	30.54	19.75	10.79	60.24	6.4	53.84					22.2912	15	9.6	5.4	14	9.8	4.2
	22.684	40.95	11	29.95	45.78	6.15	39.63					16.5516	27.964	19.75	8.214	59.757	6.4	53.357					22.3907	15.5	9.6	5.9	19.9142	9.8	10.1142
	22.784	45.95	11	34.95	48.17	6.15	42.02					16.6252	28.26	19.75	8.51	60.89	6.4	54.49					22.4902	15.34	9.6	5.74	20.38	9.8	10.58
	22.885	52.12	11	41.12	49.61	6.15	43.46					16.6987	29.63	19.75	9.88	67.67	6.4	61.27					22.5897	18.3	9.6	8.7	12.72	9.8	2.92
	22.986	55.44	11	44.44	49	6.15	42.85					16.7723	31.26	19.75	11.51	77.3	6.4	70.9					22.6893	16.04	9.6	6.44	12.64	9.8	2.84
	23.087	53	11	42	57.58	6.15	51.43					16.8458	26.33	19.75	6.58	77.85	6.4	71.45					22.7888	15.32	9.6	5.72	16.64	9.8	6.84
	23.188	60.9	11	49.9	64.68	6.15	58.53					16.9194	23	19.75	3.25	61.51	6.4	55.11					22.8883	14.02	9.6	4.42	16.02	9.8	6.22
	23.288	75.74	11	64.74	78.68	6.15	72.53					16.993	24.86	19.75	5.11	58.58	6.4	52.18					22.9878	16.96	9.6	7.36	16.32	9.8	6.52
	23.389	92.66	11	81.66	67.24	6.15	61.09					17.0665	27	19.75	7.25	51	6.4	44.6					23.0873	17.02	9.6	7.42	18.98	9.8	9.18
	23.49	100.84	11	89.84	55.24	6.15	49.09					17.1401	22	19.75	2.25	41	6.4	34.6					23.1868	13.36	9.6	3.76	15.38	9.8	5.58
	23.591	121	11	110	51	6.15	44.85					17.2137	22.5	19.75	2.75	40.222	6.4	33.822					23.2863	12.66	9.6	3.06	16.96	9.8	7.16
	23.692	115	11	104	67	6.15	60.85					17.2872	25.64	19.75	5.89	38.72	6.4	32.32					23.3859	13.66	9.6	4.06	20.98	9.8	11.18
	23.793	125	11	114	71	6.15	64.85					17.3608	23.24	19.75	3.49	48.22	6.4	41.82					23.4854	13.34	9.6	3.74	17.38	9.8	7.58
	23.893	148	11	137	96	6.15	89.85					17.4343	22	19.75	2.25	43	6.4	36.6					23.5849	11.68	9.6	2.08	15	9.8	5.2
	23.994	156	11	145	85	6.15	78.85					17.5079	25	19.75	5.25	44	6.4	37.6					23.6844	11	9.6	1.4	15	9.8	5.2
	24.095	199	11	188	107	6.15	100.85					17.5815	26	19.75	6.25	50	6.4	43.6					23.7839	11.66	9.6	2.06	16.98	9.8	7.18
	24.196	157	11	146	119	6.15	112.85					17.655	30	19.75	10.25	47	6.4	40.6					23.8834	13.98	9.6	4.38	27.9	9.8	18.1
	24.297	188	11	177	149	6.15	142.85					17.7286	27.793	19.75	8.043	42.464	6.4	36.064					23.9829	11.7	9.6	2.1	35.64	9.8	25.84
	24.397	226	11	215	126	6.15	119.85					17.8022	27.32	19.75	7.57	36.7	6.4	30.3					24.0825	11.32	9.6	1.72	31.06	9.8	21.26
	24.498	212.201	11	201.201	89.559	6.15	83.409					17.8757	24.24	19.75	4.49	34.06	6.4	27.66					24.182	12	9.6	2.4	28.66	9.8	18.86
	24.599	198.78	11	187.78	65.74	6.15	59.59					17.9493	26	19.75	6.25	32	6.4	25.6					24.2815	12.66	9.6	3.06	29	9.8	19.2
	24.7	153.471	11	142.471	60.069	6.15	53.919					18.0228	22.879	19.75	3.129	29.172	6.4	22.772					24.381	15.64	9.6	6.04	32.3	9.8	22.5
	24.801	125.1	11	114.1	74.19	6.15	68.04					18.0964	24.3	19.75	4.55	24.7	6.4	18.3					24.4805	17	9.6	7.4	32.68	9.8	22.88
	24.902	124.46	11	113.46	85.83	6.15	79.68					18.17	20.06	19.75	0.31	26.96	6.4	20.56					24.58	16.06	9.6	6.46	25.42	9.8	15.62
	25.002	138.85	11	127.85	80.88	6.15	74.73					18.2435	19.82	19.75	0.07	30.88	6.4	24.48					24.6795	16	9.6	6.4	35	9.8	25.2
	25.103	171.79	11	160.79	67.03	6.15	60.88					18.3171	19.296	19.75	-0.454	40.964	6.4	34.564					24.7791	17	9.6	7.4	62	9.8	52.2
	25.204	216.8	11	205.8	51.44	6.15	45.29					18.3907	20.52	19.75	0.77	43.48	6.4	37.08					24.8786	18	9.6	8.4	67	9.8	57.2
	25.305	214.96	11	203.96	50.95	6.15	44.8					18.4642	26.65	19.75	6.9	42	6.4	35.6					24.9781	14	9.6	4.4	70	9.8	60.2
	25.406	168.43	11	157.43	55.56	6.15	49.41					18.5378	25.14	19.75	5.39	45.72	6.4	39.32					25.0776	18	9.6	8.4	65	9.8	55.2
	25.506	117.13	11	106.13	60.73	6.15	54.58					18.6113	24.07	19.75	4.32	51.58	6.4	45.18					25.1771	14	9.6	4.4	34	9.8	24.2
	25.607	94.27	11	83.27	70.07	6.15	63.92					18.6849	29.58	19.75	9.83	57.58	6.4	51.18					25.2766	13	9.6	3.4	26	9.8	16.2
	25.708	100.14	11	89.14	81.12	6.15	74.97					18.7585	29.07	19.75	9.32	50.56	6.4	44.16					25.3761	12	9.6	2.4	25	9.8	15.2
	25.809	114.83	11	103.83	87.56	6.15	81.41					18.832	51	19.75	31.25	79	6.4	72.6					25.4757	14	9.6	4.4	38	9.8	28.2
	25.91	120.8	11	109.8	87.66	6.15	81.51					18.9056	48	19.75	28.25	76	6.4	69.6					25.5752	14	9.6	4.4	36	9.8	26.2
	26.011	142.36	11	131.36	76.59	6.15	70.44					18.9792	47	19.75	27.25	82	6.4	75.6					25.6747	17	9.6	7.4	19	9.8	9.2
	26.111	156.22	11	145.22	61.49	6.15	55.34					19.0527	57	19.75	37.25	109	6.4	102.6					25.7742	16	9.6	6.4	13	9.8	3.2
	26.212	159.29	11	148.29	49.37	6.15	43.22					19.1263	61	19.75	41.25	117	6.4	110.6					25.8737	13	9.6	3.4	19	9.8	9.2
	26.313	183.94	11	172.94	37.05	6.15	30.9					19.1998	66.157	19.75	46.407	127.778	6.4	121.378					25.9732	16	9.6	6.4	11	9.8	1.2
	26.414	223.7	11	212.7	40.24	6.15	34.09					19.2734	75.92	19.75	56.17	122.78	6.4	116.38					26.0727	24	9.6	14.4	10	9.8	0.2
	26.515	243.17	11	232.17	48.83	6.15	42.68					19.347	92.22	19.75	72.47	130.16	6.4	123.76					26.1723	26	9.6	16.4	15	9.8	5.2
	26.615	241.1	11	230.1	49.73	6.15	43.58					19.4205	96	19.75	76.25	129	6.4	122.6					26.2718	29	9.6	19.4	20	9.8	10.2
	26.716	223.3	11	212.3	57.51	6.15	51.36					19.4941	106	19.75	86.25	143	6.4	136.6					26.3713	29.207	9.6	19.607	45.0416	9.8	35.2416
	26.817	194.86	11	183.86	59.49	6.15	53.34					19.5677	115	19.75	95.25	156	6.4	149.6					26.4708	32.96	9.6	23.36	34.22	9.8	24.42
	26.918	165.74	11	154.74	49.71	6.15	43.56					19.6412	139	19.75	119.25	146	6.4	139.6					26.5703	31.7	9.6	22.1	14.42	9.8	4.62
	27.019	139.54	11	128.54	41.83	6.15	35.68					19.7148	160	19.75	140.25	147	6.4	140.6					26.6698	31.32	9.6	21.72	13.3	9.8	3.5
	27.12	118.91	11	107.91	39.61	6.15	33.46					19.7883	171	19.75	151.25	146	6.4	139.6					26.7693	30.02	9.6	20.42	14.34	9.8	4.54
	27.22	94.15	11	83.15	38.61	6.15	32.46					19.8619	155	19.75	135.25	137	6.4	130.6					26.8689	27.68	9.6	18.08	14.66	9.8	4.86
	27.321	78.76	11	67.76	37.61	6.15	31.46					19.9355	181	19.75	161.25	134	6.4	127.6					26.9684	25.02	9.6	15.42	18.96	9.8	9.16
	27.422	76.8	11	65.8	39.34	6.15	33.19					20.009	161	19.75	141.25	129	6.4	122.6					27.0679	21.36	9.6	11.76	17.7	9.8	7.9
	27.523	106.94	11	95.94	42.22	6.15	36.07					20.0826	142	19.75	122.25	102	6.4	95.6					27.1674	20.66	9.6	11.06	14.02	9.8	4.22
	27.624	124.86	11	113.86	46.46	6.15	40.31					20.1562	134.672	19.75	114.922	95.5	6.4	89.1					27.2669	21.66	9.6	12.06	13.66	9.8	3.86
	27.724	94.18	11	83.18	53.44	6.15	47.29					20.2297	118.44	19.75	98.69	93.62	6.4	87.22					27.3664	17.38	9.6	7.78	10.7	9.8	0.9
	27.825	75.986	11	64.986	47.231	6.15	41.081					20.3033	113	19.75	93.25	101.28	6.4	94.88					27.4659	16.32	9.6	6.72	12.96	9.8	3.16
	27.926	82.48	11	71.48	44.44	6.15	38.29					20.3768	113.94	19.75	94.19	104	6.4	97.6					27.5655	16.34	9.6	6.74	16.98	9.8	7.18
	28.027	63.72	11	52.72	37.44	6.15	31.29					20.4504	112	19.75	92.25	124	6.4	117.6					27.665	17.32	9.6	7.72	19.98	9.8	10.18
	28.128	47.96	11	36.96	30.68	6.15	24.53					20.524	130	19.75	110.25	95	6.4	88.6					27.7645	16.68	9.6	7.08	30.24	9.8	20.44
	28.228	35.84	11	24.84	27.16	6.15	21.01					20.5975	142	19.75	122.25	105	6.4	98.6					27.864	18.64	9.6	9.04	40.94	9.8	31.14
	28.329	34.08	11	23.08	29.32	6.15	23.17					20.6711	150	19.75	130.25	87	6.4	80.6					27.9635	17.36	9.6	7.76	46.64	9.8	36.84
	28.43	35.903	11	24.903	32.936	6.15	26.786					20.7447	152	19.75	132.25	107	6.4	100.6					28.063	16.66	9.6	7.06	42.72	9.8	32.92
	28.531	42.885	11	31.885	34.401	6.15	28.251					20.8182	126.781	19.75	107.031	113.879	6.4	107.479					28.1625	20.96	9.6	11.36	31.42	9.8	21.62
	28.632	68.569	11	57.569	42.645	6.15	36.495					20.8918	121.38	19.75	101.63	118.7	6.4	112.3					28.2621	23.66	9.6	14.06	30.3	9.8	20.5
	28.733	86.05	11	75.05	46.61	6.15	40.46					20.9653	115.24	19.75	95.49	118.88	6.4	112.48					28.3616	24.66	9.6	15.06	23.42	9.8	13.62
	28.833	84.52	11	73.52	47.87	6.15	41.72					21.0389	116.387	19.75	96.637	145.108	6.4	138.708					28.4611	35.56	9.6	25.96	14.38	9.8	4.58
	28.934	78.78	11	67.78	46.26	6.15	40.11					21.1125	135.19	19.75	115.44	145.07	6.4	138.67					28.5606	55.52	9.6	45.92	12.66	9.8	2.86
	29.035	71.04	11	60.04	52.09	6.15	45.94					21.186	154.88	19.75	135.13	174.48	6.4	168.08					28.6601	72.9	9.6	63.3	13.66	9.8	3.86
	29.136	94.36	11	83.36	52.13	6.15	45.98					21.2596	166	19.75	146.25	163	6.4	156.6					28.7596	87.24	9.6	77.64	15.98	9.8	6.18
	29.237	113.66	11	102.66	51.13	6.15	44.98					21.3332	191	19.75	171.25	203	6.4	196.6					28.8591	74.14	9.6	64.54	28.28	9.8	18.48
	29.337	120.35	11	109.35	64.92	6.15	58.77					21.4067	194	19.75	174.25	221	6.4	214.6					28.9587	61	9.6	51.4	30	9.8	20.2
	29.438	107.635	11	96.635	64.165	6.15	58.015					21.4803	214	19.75	194.25	222	6.4	215.6					29.0582	41	9.6	31.4	40	9.8	30.2
	29.539	81.73	11	70.73	57.16	6.15	51.01					21.5538	216	19.75	196.25	232	6.4	225.6					29.1577	40	9.6	30.4	32	9.8	22.2
	29.64	70.16	11	59.16	50.29	6.15	44.14					21.6274	208	19.75	188.25	237	6.4	230.6					29.2572	37	9.6	27.4	24	9.8	14.2
	29.741	59.87	11	48.87	56.41	6.15	50.26					21.701	179	19.75	159.25	215	6.4	208.6					29.3567	42	9.6	32.4	17	9.8	7.2
	29.842	56.57	11	45.57	75.68	6.15	69.53					21.7745	144.594	19.75	124.844	176.866	6.4	170.466					29.4562	39.722	9.6	30.122	17.0355	9.8	7.2355
	29.942	59.28	11	48.28	87.71	6.15	81.56					21.8481	105.56	19.75	85.81	135.62	6.4	129.22					29.5557	34.74	9.6	25.14	14.34	9.8	4.54
	30.043	55.87	11	44.87	83.87	6.15	77.72					21.9217	89.38	19.75	69.63	113.74	6.4	107.34					29.6553	26.38	9.6	16.78	13.34	9.8	3.54
	30.144	50.29	11	39.29	73.73	6.15	67.58					21.9952	81.06	19.75	61.31	115.28	6.4	108.88					29.7548	29.64	9.6	20.04	10.18	9.8	0.38
	30.245	49.57	11	38.57	76.98	6.15	70.83					22.0688	68.1	19.75	48.35	121.3	6.4	114.9					29.8543	26	9.6	16.4	10	9.8	0.2
	30.346	54.56	11	43.56	77.3	6.15	71.15					22.1423	69.211	19.75	49.461	121.785	6.4	115.385					29.9538	21	9.6	11.4	12	9.8	2.2
	30.446	59.14	11	48.14	67.87	6.15	61.72					22.2159	71.32	19.75	51.57	110.57	6.4	104.17					30.0533	25	9.6	15.4	22	9.8	12.2
	30.547	59.43	11	48.43	63.43	6.15	57.28					22.2895	80.59	19.75	60.84	82.47	6.4	76.07					30.1528	30	9.6	20.4	19	9.8	9.2
	30.648	58.43	11	47.43	60.15	6.15	54					22.363	61.48	19.75	41.73	54.54	6.4	48.14					30.2523	55	9.6	45.4	22	9.8	12.2
	30.749	59.14	11	48.14	59.14	6.15	52.99					22.4366	47.28	19.75	27.53	47.14	6.4	40.74					30.3519	79	9.6	69.4	19	9.8	9.2
	30.85	57.15	11	46.15	63.42	6.15	57.27					22.5102	60	19.75	40.25	47	6.4	40.6					30.4514	87	9.6	77.4	15	9.8	5.2
	30.951	53.187	11	42.187	62.497	6.15	56.347					22.5837	46	19.75	26.25	46	6.4	39.6					30.5509	85	9.6	75.4	12	9.8	2.2
	31.051	63.538	11	52.538	61.838	6.15	55.688					22.6573	45	19.75	25.25	40	6.4	33.6					30.6504	56.802	9.6	47.202	16.4497	9.8	6.6497
	31.152	96.361	11	85.361	68.876	6.15	62.726					22.7309	43	19.75	23.25	48	6.4	41.6					30.7499	40.06	9.6	30.46	13.38	9.8	3.58
	31.253	91.69	11	80.69	74.35	6.15	68.2					22.8044	43.086	19.75	23.336	58.399	6.4	51.999					30.8494	32.38	9.6	22.78	10.34	9.8	0.54
	31.354	89.01	11	78.01	72.03	6.15	65.88					22.878	41.36	19.75	21.61	68.94	6.4	62.54					30.9489	30	9.6	20.4	10	9.8	0.2
	31.455	61	11	50	55	6.15	48.85					22.9515	48.46	19.75	28.71	74.82	6.4	68.42					31.0485	26.7	9.6	17.1	13.3	9.8	3.5
	31.555	44	11	33	61	6.15	54.85					23.0251	39	19.75	19.25	87	6.4	80.6					31.148	32.92	9.6	23.32	12.36	9.8	2.56
	31.656	35	11	24	49	6.15	42.85					23.0987	46.607	19.75	26.857	79.529	6.4	73.129					31.2475	25.72	9.6	16.12	7.24	9.8	-2.56
	31.757	28	11	17	47	6.15	40.85					23.1722	49.32	19.75	29.57	75.4	6.4	69					31.347	34	9.6	24.4	16	9.8	6.2
	31.858	41	11	30	44	6.15	37.85					23.2458	50	19.75	30.25	81.4	6.4	75					31.4465	47	9.6	37.4	22	9.8	12.2
	31.959	51	11	40	40	6.15	33.85					23.3194	42	19.75	22.25	67	6.4	60.6					31.546	50.536	9.6	40.936	29.1569	9.8	19.3569
	32.059	58	11	47	59	6.15	52.85					23.3929	42.743	19.75	22.993	73.571	6.4	67.171					31.6455	61.9	9.6	52.3	34.32	9.8	24.52
	32.16	52	11	41	66	6.15	59.85					23.4665	39.02	19.75	19.27	68.74	6.4	62.34					31.7451	90.212	9.6	80.612	26.1914	9.8	16.3914
	32.261	41	11	30	33	6.15	26.85					23.54	41.76	19.75	22.01	71.58	6.4	65.18					31.8446	97.74	9.6	88.14	17.17	9.8	7.37
	32.362	36.843	11	25.843	33.864	6.15	27.714					23.6136	41	19.75	21.25	53	6.4	46.6					31.9441	66.08	9.6	56.48	19.39	9.8	9.59
	32.463	38.64	11	27.64	34.96	6.15	28.81					23.6872	41	19.75	21.25	48	6.4	41.6					32.0436	44.678	9.6	35.078	20.997	9.8	11.197
	32.564	40	11	29	41.62	6.15	35.47					23.7607	49	19.75	29.25	41	6.4	34.6					32.1431	40.24	9.6	30.64	22.84	9.8	13.04
	32.664	47.26	11	36.26	38.06	6.15	31.91					23.8343	47	19.75	27.25	45	6.4	38.6					32.2426	43.4	9.6	33.8	21.16	9.8	11.36
	32.765	49.02	11	38.02	33.02	6.15	26.87					23.9079	44	19.75	24.25	46	6.4	39.6					32.3421	49.891	9.6	40.291	22.1211	9.8	12.3211
	32.866	43.138	11	32.138	31.501	6.15	25.351					23.9814	43	19.75	23.25	48	6.4	41.6					32.4417	69.302	9.6	59.702	19.1258	9.8	9.3258
	32.967	39.44	11	28.44	30.83	6.15	24.68					24.055	47	19.75	27.25	50	6.4	43.6					32.5412	98.04	9.6	88.44	16.2	9.8	6.4
	33.068	36.22	11	25.22	30.95	6.15	24.8					24.1285	44	19.75	24.25	48	6.4	41.6					32.6407	119.44	9.6	109.84	15.76	9.8	5.96
	33.168	34.22	11	23.22	32.44	6.15	26.29					24.2021	45	19.75	25.25	56	6.4	49.6					32.7402	136.92	9.6	127.32	21.32	9.8	11.52
	33.269	34.56	11	23.56	31.56	6.15	25.41					24.2757	40	19.75	20.25	64	6.4	57.6					32.8397	147.84	9.6	138.24	22.24	9.8	12.44
	33.37	35.83	11	24.83	37.12	6.15	30.97					24.3492	39	19.75	19.25	70	6.4	63.6					32.9392	168.43	9.6	158.83	22.97	9.8	13.17
	33.471	30.05	11	19.05	34.89	6.15	28.74					24.4228	47	19.75	27.25	70	6.4	63.6					33.0387	154	9.6	144.4	38	9.8	28.2
	33.572	28.02	11	17.02	32.02	6.15	25.87					24.4964	46	19.75	26.25	67	6.4	60.6					33.1383	142	9.6	132.4	43	9.8	33.2
	33.673	30.94	11	19.94	34.94	6.15	28.79					24.5699	47	19.75	27.25	64	6.4	57.6					33.2378	127.58	9.6	117.98	40.3076	9.8	30.5076
	33.773	32.96	11	21.96	31.08	6.15	24.93					24.6435	42	19.75	22.25	55	6.4	48.6					33.3373	114.12	9.6	104.52	41.68	9.8	31.88
	33.874	29.08	11	18.08	41.78	6.15	35.63					24.717	37	19.75	17.25	51	6.4	44.6					33.4368	88.86	9.6	79.26	48.92	9.8	39.12
	33.975	29	11	18	41.02	6.15	34.87					24.7906	43	19.75	23.25	37	6.4	30.6					33.5363	114.72	9.6	105.12	44.54	9.8	34.74
	34.076	27.04	11	16.04	37.08	6.15	30.93					24.8642	42	19.75	22.25	36	6.4	29.6					33.6358	82	9.6	72.4	61	9.8	51.2
	34.177	24.06	11	13.06	51.7	6.15	45.55					24.9377	37	19.75	17.25	41	6.4	34.6					33.7353	58.802	9.6	49.202	51.065	9.8	41.265
	34.277	21.06	11	10.06	76.5	6.15	70.35					25.0113	39	19.75	19.25	47	6.4	40.6					33.8349	42.44	9.6	32.84	49	9.8	39.2
	34.378	18.06	11	7.06	69.16	6.15	63.01					25.0849	38	19.75	18.25	50	6.4	43.6					33.9344	38.981	9.6	29.381	42.7222	9.8	32.9222
	34.479	19.96	11	8.96	35.68	6.15	29.53					25.1584	33	19.75	13.25	47	6.4	40.6					34.0339	37.95	9.6	28.35	30.83	9.8	21.03
	34.58	20	11	9	43.82	6.15	37.67					25.232	32	19.75	12.25	41	6.4	34.6					34.1334	42.104	9.6	32.504	33.9861	9.8	24.1861
	34.681	18.04	11	7.04	71.44	6.15	65.29					25.3055	36	19.75	16.25	41	6.4	34.6					34.2329	53.4	9.6	43.8	42.32	9.8	32.52
	34.782	19.96	11	8.96	94.54	6.15	88.39					25.3791	31	19.75	11.25	42	6.4	35.6					34.3324	58.48	9.6	48.88	45.84	9.8	36.04
	34.882	20.98	11	9.98	79.32	6.15	73.17					25.4527	31	19.75	11.25	44	6.4	37.6					34.4319	65.52	9.6	55.92	45.9	9.8	36.1
	34.983	18.06	11	7.06	70.18	6.15	64.03					25.5262	30.793	19.75	11.043	50.485	6.4	44.085					34.5315	67.22	9.6	57.62	33.4	9.8	23.6
	35.084	19.75	11	8.75	61.81	6.15	55.66					25.5998	30.34	19.75	10.59	52.66	6.4	46.26					34.631	63.1	9.6	53.5	28.22	9.8	18.42
	35.185	20.95	11	9.95	56.45	6.15	50.3					25.6734	33.96	19.75	14.21	51.02	6.4	44.62					34.7305	53.42	9.6	43.82	31.9	9.8	22.1
	35.286	23.3	11	12.3	50.1	6.15	43.95					25.7469	35.34	19.75	15.59	51.32	6.4	44.92					34.83	61.78	9.6	52.18	18.3	9.8	8.5
	35.386	24.65	11	13.65	48.65	6.15	42.5					25.8205	35	19.75	15.25	50.68	6.4	44.28					34.9295	45	9.6	35.4	31	9.8	21.2
	35.487	29.7	11	18.7	33.96	6.15	27.81					25.894	32.36	19.75	12.61	53.96	6.4	47.56					35.029	45.657	9.6	36.057	26.565	9.8	16.765
	35.588	32	11	21	38	6.15	31.85					25.9676	32.98	19.75	13.23	59.96	6.4	53.56					35.1285	41.02	9.6	31.42	30	9.8	20.2
	35.689	34	11	23	39	6.15	32.85					26.0412	35.32	19.75	15.57	58.7	6.4	52.3					35.2281	40.999	9.6	31.399	23.0732	9.8	13.2732
	35.79	40	11	29	46	6.15	39.85					26.1147	39.3	19.75	19.55	60.96	6.4	54.56					35.3276	39.24	9.6	29.64	19.5467	9.8	9.7467
	35.891	40	11	29	62	6.15	55.85					26.1883	42.32	19.75	22.57	62.34	6.4	55.94					35.4271	32.906	9.6	23.306	16.6351	9.8	6.8351
	35.991	29	11	18	50	6.15	43.85					26.2619	43.66	19.75	23.91	63.32	6.4	56.92					35.5266	27.35	9.6	17.75	16	9.8	6.2
	36.092	28.086	11	17.086	59.728	6.15	53.578					26.3354	44	19.75	24.25	56.08	6.4	49.68					35.6261	32	9.6	22.4	18	9.8	8.2
	36.193	26.68	11	15.68	64.64	6.15	58.49					26.409	40.04	19.75	20.29	53.98	6.4	47.58					35.7256	26	9.6	16.4	20	9.8	10.2
	36.294	22.7	11	11.7	57.42	6.15	51.27					26.4825	34.7	19.75	14.95	52.36	6.4	45.96					35.8251	43	9.6	33.4	31	9.8	21.2
	36.395	22.032	11	11.032	59.178	6.15	53.028					26.5561	35.64	19.75	15.89	47.7	6.4	41.3					35.9247	48	9.6	38.4	33	9.8	23.2
	36.495	21.44	11	10.44	62.83	6.15	56.68					26.6297	37	19.75	17.25	45.34	6.4	38.94					36.0242	64	9.6	54.4	34	9.8	24.2
	36.596	23.655	11	12.655	56.348	6.15	50.198					26.7032	36.34	19.75	16.59	39.06	6.4	32.66					36.1237	49	9.6	39.4	36	9.8	26.2
	36.697	29.48	11	18.48	45.24	6.15	39.09					26.7768	32.04	19.75	12.29	37.98	6.4	31.58					36.2232	64	9.6	54.4	44	9.8	34.2
	36.798	34.52	11	23.52	47.6	6.15	41.45					26.8504	28.68	19.75	8.93	38.34	6.4	31.94					36.3227	59.879	9.6	50.279	35.2218	9.8	25.4218
	36.899	28.84	11	17.84	43.96	6.15	37.81					26.9239	28	19.75	8.25	41.96	6.4	35.56					36.4222	55.02	9.6	45.42	39.58	9.8	29.78
	36.999	27	11	16	54.28	6.15	48.13					26.9975	29.32	19.75	9.57	42.02	6.4	35.62					36.5217	37.08	9.6	27.48	36.48	9.8	26.68
	37.1	26.36	11	15.36	45.2	6.15	39.05					27.071	28.68	19.75	8.93	44.96	6.4	38.56					36.6213	20.96	9.6	11.36	31.3	9.8	21.5
	37.201	20.14	11	9.14	40.56	6.15	34.41					27.1446	26.917	19.75	7.167	43.936	6.4	37.536					36.7208	23	9.6	13.4	28	9.8	18.2
	37.302	23.56	11	12.56	48.78	6.15	42.63					27.2182	24.56	19.75	4.81	46.51	6.4	40.11					36.8203	25	9.6	15.4	30	9.8	20.2
	37.403	24.78	11	13.78	54.46	6.15	48.31					27.2917	29.37	19.75	9.62	63.85	6.4	57.45					36.9198	20	9.6	10.4	26	9.8	16.2
	37.504	24.898	11	13.898	54.967	6.15	48.817					27.3653	29.02	19.75	9.27	81.7	6.4	75.3					37.0193	21	9.6	11.4	24	9.8	14.2
	37.604	23	11	12	48.5	6.15	42.35					27.4389	27.04	19.75	7.29	75.14	6.4	68.74					37.1188	23.899	9.6	14.299	24.7929	9.8	14.9929
	37.705	20.5	11	9.5	44	6.15	37.85					27.5124	27.98	19.75	8.23	58.34	6.4	51.94					37.2183	21.66	9.6	12.06	39.86	9.8	30.06
	37.806	19	11	8	44.5	6.15	38.35					27.586	41	19.75	21.25	60	6.4	53.6					37.3179	21.06	9.6	11.46	59.22	9.8	49.42
	37.907	18.5	11	7.5	52	6.15	45.85					27.6595	46	19.75	26.25	47	6.4	40.6					37.4174	21	9.6	11.4	65	9.8	55.2
	38.008	18.362	11	7.362	69.18	6.15	63.03					27.7331	43	19.75	23.25	36	6.4	29.6					37.5169	23	9.6	13.4	63	9.8	53.2
	38.108	18.684	11	7.684	84.801	6.15	78.651					27.8067	34	19.75	14.25	26	6.4	19.6					37.6164	22.05	9.6	12.45	50.9792	9.8	41.1792
	38.209	19.32	11	8.32	79.24	6.15	73.09					27.8802	29	19.75	9.25	33	6.4	26.6					37.7159	25.147	9.6	15.547	48.4314	9.8	38.6314
	38.31	20.971	11	9.971	66.957	6.15	60.807					27.9538	28	19.75	8.25	28	6.4	21.6					37.8154	24.745	9.6	15.145	48.1475	9.8	38.3475
	38.411	22	11	11	68.95	6.15	62.8					28.0274	27	19.75	7.25	25	6.4	18.6					37.9149	23.331	9.6	13.731	59.4884	9.8	49.6884
	38.512	16.06	11	5.06	63.06	6.15	56.91					28.1009	26	19.75	6.25	19	6.4	12.6					38.0145	32.84	9.6	23.24	60.36	9.8	50.56
	38.613	17.98	11	6.98	54.09	6.15	47.94					28.1745	24	19.75	4.25	20	6.4	13.6					38.114	35.82	9.6	26.22	46.06	9.8	36.26
	38.713	24	11	13	51	6.15	44.85					28.248	29	19.75	9.25	23	6.4	16.6					38.2135	34.36	9.6	24.76	42.18	9.8	32.38
	38.814	20	11	9	47	6.15	40.85					28.3216	37	19.75	17.25	41	6.4	34.6					38.313	38.1	9.6	28.5	42	9.8	32.2
	38.915	21	11	10	52	6.15	45.85					28.3952	34	19.75	14.25	53	6.4	46.6					38.4125	46.38	9.6	36.78	40.36	9.8	30.56
	39.016	24	11	13	62	6.15	55.85					28.4687	40	19.75	20.25	52	6.4	45.6					38.512	41.549	9.6	31.949	51.3405	9.8	41.5405
	39.117	27.364	11	16.364	73.178	6.15	67.028					28.5423	41	19.75	21.25	53	6.4	46.6					38.6115	31.7	9.6	22.1	60.47	9.8	50.67
	39.217	26.721	11	15.721	83.703	6.15	77.553					28.6159	41.828	19.75	22.078	49.722	6.4	43.322					38.7111	29.943	9.6	20.343	65.6157	9.8	55.8157
	39.318	24.111	11	13.111	106.905	6.15	100.755					28.6894	38.36	19.75	18.61	54.96	6.4	48.56					38.8106	30.25	9.6	20.65	78	9.8	68.2
	39.419	24.138	11	13.138	107.802	6.15	101.652					28.763	36.34	19.75	16.59	61.62	6.4	55.22					38.9101	38.5	9.6	28.9	76	9.8	66.2
	39.52	22.36	11	11.36	92.24	6.15	86.09					28.8365	33.36	19.75	13.61	57.4	6.4	51					39.0096	35.25	9.6	25.65	57.75	9.8	47.95
	39.621	22.98	11	11.98	83.12	6.15	76.97					28.9101	29.36	19.75	9.61	50.7	6.4	44.3					39.1091	42.75	9.6	33.15	48	9.8	38.2
	39.722	21.6	11	10.6	73.69	6.15	67.54					28.9837	29.98	19.75	10.23	54.28	6.4	47.88					39.2086	52.75	9.6	43.15	43.25	9.8	33.45
	39.822	21.65	11	10.65	63.9	6.15	57.75					29.0572	30.234	19.75	10.484	56.767	6.4	50.367					39.3081	47.75	9.6	38.15	29.5	9.8	19.7
	39.923	15.42	11	4.42	59.94	6.15	53.79					29.1308	28.83	19.75	9.08	57.61	6.4	51.21					39.4076	43	9.6	33.4	30.25	9.8	20.45
	40.024	18.88	11	7.88	38.401	6.15	32.251					29.2044	27.78	19.75	8.03	52.32	6.4	45.92					39.5072	38.5	9.6	28.9	28	9.8	18.2
	40.125	23.89	11	12.89	27.33	6.15	21.18					29.2779	30.58	19.75	10.83	40.26	6.4	33.86					39.6067	34.25	9.6	24.65	24.75	9.8	14.95
	40.226	35.23	11	24.23	36.09	6.15	29.94					29.3515	32.96	19.75	13.21	37.04	6.4	30.64					39.7062	30.38	9.6	20.78	18.3	9.8	8.5
	40.326	33.062	11	22.062	42.795	6.15	36.645					29.425	32	19.75	12.25	46	6.4	39.6					39.8057	31.76	9.6	22.16	20	9.8	10.2
	40.427	26.181	11	15.181	48.457	6.15	42.307					29.4986	35	19.75	15.25	43	6.4	36.6					39.9052	37.64	9.6	28.04	15.3	9.8	5.5
	40.528	20.658	11	9.658	59.656	6.15	53.506					29.5722	37	19.75	17.25	48	6.4	41.6					40.0047	35.18	9.6	25.58	13.12	9.8	3.32
	40.629	19.719	11	8.719	57.792	6.15	51.642					29.6457	31	19.75	11.25	46	6.4	39.6					40.1043	41.58	9.6	31.98	14.88	9.8	5.08
	40.73	17.964	11	6.964	47.578	6.15	41.428					29.7193	30	19.75	10.25	39	6.4	32.6					40.2038	51.4	9.6	41.8	15	9.8	5.2
	40.83	17.342	11	6.342	46.726	6.15	40.576					29.7929	31	19.75	11.25	48	6.4	41.6					40.3033	49.18	9.6	39.58	24.4	9.8	14.6
	40.931	19.052	11	8.052	62.578	6.15	56.428					29.8664	32	19.75	12.25	26	6.4	19.6					40.4028	59.158	9.6	49.558	13.559	9.8	3.759
	41.032	16.917	11	5.917	64.174	6.15	58.024					29.94	29	19.75	9.25	25	6.4	18.6					40.5023	68.67	9.6	59.07	9.48	9.8	-0.32
	41.133	16.14	11	5.14	67.29	6.15	61.14					30.0135	27	19.75	7.25	27	6.4	20.6					40.6018	72.63	9.6	63.03	13.67	9.8	3.87
	41.234	19.7	11	8.7	69.6	6.15	63.45					30.0871	25	19.75	5.25	21	6.4	14.6					40.7013	64.321	9.6	54.721	10.7904	9.8	0.9904
	41.335	25.94	11	14.94	59.11	6.15	52.96					30.1607	28	19.75	8.25	24	6.4	17.6					40.8008	59	9.6	49.4	9	9.8	-0.8
	41.435	31.94	11	20.94	63.95	6.15	57.8					30.2342	31	19.75	11.25	32	6.4	25.6					40.9004	53.6	9.6	44	10.44	9.8	0.64
	41.536	31.01	11	20.01	51.13	6.15	44.98					30.3078	29	19.75	9.25	25	6.4	18.6					40.9999	44	9.6	34.4	14.54	9.8	4.74
	41.637	23.08	11	12.08	51	6.15	44.85					30.3814	25	19.75	5.25	27	6.4	20.6					41.0994	45.94	9.6	36.34	14.03	9.8	4.23
	41.738	26.96	11	15.96	42.09	6.15	35.94					30.4549	27.621	19.75	7.871	25.414	6.4	19.014					41.1989	43	9.6	33.4	12	9.8	2.2
	41.839	22.38	11	11.38	43.19	6.15	37.04					30.5285	29.66	19.75	9.91	25.64	6.4	19.24					41.2984	39	9.6	29.4	16	9.8	6.2
	41.939	21.65	11	10.65	42.05	6.15	35.9					30.6021	29.06	19.75	9.31	27.94	6.4	21.54					41.3979	28	9.6	18.4	18	9.8	8.2
	42.04	18.24	11	7.24	45.7	6.15	39.55					30.6756	29	19.75	9.25	33	6.4	26.6					41.4975	24	9.6	14.4	28	9.8	18.2
	42.141	20.666	11	9.666	70.17	6.15	64.02					30.7492	32	19.75	12.25	49	6.4	42.6					41.597	28	9.6	18.4	38	9.8	28.2
	42.242	23.15	11	12.15	89.45	6.15	83.3					30.8227	29	19.75	9.25	52	6.4	45.6					41.6965	31	9.6	21.4	51	9.8	41.2
	42.343	25	11	14	76.4	6.15	70.25					30.8963	30	19.75	10.25	54	6.4	47.6					41.796	44	9.6	34.4	32	9.8	22.2
	42.444	22	11	11	70	6.15	63.85					30.9699	34	19.75	14.25	52	6.4	45.6					41.8955	47.707	9.6	38.107	24.6508	9.8	14.8508
	42.544	17	11	6	76	6.15	69.85					31.0434	32	19.75	12.25	42	6.4	35.6					41.995	43.08	9.6	33.48	27.98	9.8	18.18
	42.645	21	11	10	87	6.15	80.85					31.117	33	19.75	13.25	40	6.4	33.6					42.0945	43.7	9.6	34.1	32.76	9.8	22.96
	42.746	20	11	9	90	6.15	83.85					31.1906	36	19.75	16.25	27	6.4	20.6					42.194	27	9.6	17.4	32	9.8	22.2
	42.847	20	11	9	75	6.15	68.85					31.2641	30	19.75	10.25	18	6.4	11.6					42.2936	19.843	9.6	10.243	40.6924	9.8	30.8924
	42.948	19	11	8	54	6.15	47.85					31.3377	30	19.75	10.25	19	6.4	12.6					42.3931	16.069	9.6	6.469	51.8576	9.8	42.0576
	43.048	21	11	10	53	6.15	46.85					31.4112	34	19.75	14.25	20	6.4	13.6					42.4926	15.92	9.6	6.32	63.08	9.8	53.28
	43.149	20.828	11	9.828	59.692	6.15	53.542					31.4848	27	19.75	7.25	12	6.4	5.6					42.5921	18.36	9.6	8.76	54.24	9.8	44.44
	43.25	20.98	11	9.98	87.4	6.15	81.25					31.5584	28	19.75	8.25	17	6.4	10.6					42.6916	17.07	9.6	7.47	40.77	9.8	30.97
	43.351	22.66	11	11.66	116.84	6.15	110.69					31.6319	28	19.75	8.25	14	6.4	7.6					42.7911	19.697	9.6	10.097	41.323	9.8	31.523
	43.452	24.049	11	13.049	133.493	6.15	127.343					31.7055	29	19.75	9.25	13	6.4	6.6					42.8907	26.34	9.6	16.74	37.52	9.8	27.72
	43.553	24.83	11	13.83	142.13	6.15	135.98					31.7791	29	19.75	9.25	22	6.4	15.6					42.9902	28.08	9.6	18.48	33.24	9.8	23.44
	43.653	23.39	11	12.39	97.43	6.15	91.28					31.8526	30	19.75	10.25	20	6.4	13.6					43.0897	61	9.6	51.4	37	9.8	27.2
	43.754	24	11	13	50.03	6.15	43.88					31.9262	27	19.75	7.25	29	6.4	22.6					43.1892	33	9.6	23.4	26	9.8	16.2
	43.855	27.51	11	16.51	34.44	6.15	28.29					31.9997	34	19.75	14.25	31	6.4	24.6					43.2887	22	9.6	12.4	35	9.8	25.2
	43.956	40.9	11	29.9	48.59	6.15	42.44					32.0733	32	19.75	12.25	35	6.4	28.6					43.3882	24	9.6	14.4	38	9.8	28.2
	44.057	41.04	11	30.04	45.16	6.15	39.01					32.1469	38	19.75	18.25	39	6.4	32.6					43.4877	23	9.6	13.4	41	9.8	31.2
	44.157	43.94	11	32.94	48.92	6.15	42.77					32.2204	36	19.75	16.25	41	6.4	34.6					43.5872	20.586	9.6	10.986	43.5355	9.8	33.7355
	44.258	40.08	11	29.08	51.94	6.15	45.79					32.294	33	19.75	13.25	43	6.4	36.6					43.6868	18.34	9.6	8.74	44	9.8	34.2
	44.359	55.331	11	44.331	74.891	6.15	68.741					32.3676	36	19.75	16.25	45	6.4	38.6					43.7863	19.88	9.6	10.28	56.22	9.8	46.42
	44.46	63.35	11	52.35	77.85	6.15	71.7					32.4411	29	19.75	9.25	36	6.4	29.6					43.8858	19	9.6	9.4	44	9.8	34.2
	44.561	53.9	11	42.9	76.6	6.15	70.45					32.5147	31.536	19.75	11.786	41.778	6.4	35.378					43.9853	20	9.6	10.4	37	9.8	27.2
	44.661	47.05	11	36.05	91.65	6.15	85.5					32.5882	32	19.75	12.25	44.32	6.4	37.92					44.0848	14	9.6	4.4	37	9.8	27.2
	44.762	56.34	11	45.34	80.2	6.15	74.05					32.6618	33.049	19.75	13.299	38.906	6.4	32.506					44.1843	13	9.6	3.4	41	9.8	31.2
	44.863	46	11	35	74	6.15	67.85					32.7354	31.49	19.75	11.74	37.83	6.4	31.43					44.2839	18	9.6	8.4	48	9.8	38.2
	44.964	46	11	35	77	6.15	70.85					32.8089	28.37	19.75	8.62	36	6.4	29.6					44.3834	18	9.6	8.4	78	9.8	68.2
	45.065	50	11	39	74	6.15	67.85					32.8825	30.96	19.75	11.21	36	6.4	29.6					44.4829	17	9.6	7.4	89	9.8	79.2
	45.166	49	11	38	55	6.15	48.85					32.9561	28.06	19.75	8.31	38.94	6.4	32.54					44.5824	14	9.6	4.4	85	9.8	75.2
	45.266	37.772	11	26.772	46.858	6.15	40.708					33.0296	24	19.75	4.25	48	6.4	41.6					44.6819	14	9.6	4.4	78	9.8	68.2
	45.367	30.7	11	19.7	38.42	6.15	32.27					33.1032	25	19.75	5.25	44	6.4	37.6					44.7814	14	9.6	4.4	59	9.8	49.2
	45.468	27.02	11	16.02	43.9	6.15	37.75					33.1767	27	19.75	7.25	45	6.4	38.6					44.8809	14	9.6	4.4	33	9.8	23.2
	45.569	24.02	11	13.02	50.98	6.15	44.83					33.2503	31	19.75	11.25	34	6.4	27.6					44.9804	13	9.6	3.4	37	9.8	27.2
	45.67	21.12	11	10.12	50.12	6.15	43.97					33.3239	27	19.75	7.25	28	6.4	21.6					45.08	13	9.6	3.4	29	9.8	19.2
	45.77	21	11	10	48	6.15	41.85					33.3974	31	19.75	11.25	35	6.4	28.6					45.1795	16	9.6	6.4	51	9.8	41.2
	45.871	22	11	11	49	6.15	42.85					33.471	28	19.75	8.25	31	6.4	24.6					45.279	17	9.6	7.4	47	9.8	37.2
	45.972	23	11	12	38	6.15	31.85					33.5446	33	19.75	13.25	36	6.4	29.6					45.3785	16	9.6	6.4	54	9.8	44.2
	46.073	35	11	24	41	6.15	34.85					33.6181	35	19.75	15.25	36	6.4	29.6					45.478	15	9.6	5.4	45	9.8	35.2
	46.174	32	11	21	38	6.15	31.85					33.6917	35	19.75	15.25	32	6.4	25.6					45.5775	18	9.6	8.4	34	9.8	24.2
	46.275	24.479	11	13.479	37.707	6.15	31.557					33.7652	29	19.75	9.25	28	6.4	21.6					45.6771	19.293	9.6	9.693	51.7843	9.8	41.9843
	46.375	24.66	11	13.66	37	6.15	30.85					33.8388	31	19.75	11.25	27	6.4	20.6					45.7766	21.66	9.6	12.06	45.08	9.8	35.28
	46.476	24.34	11	13.34	35.68	6.15	29.53					33.9124	28	19.75	8.25	22	6.4	15.6					45.8761	20.68	9.6	11.08	36.38	9.8	26.58
	46.577	24	11	13	36.98	6.15	30.83					33.9859	28	19.75	8.25	20	6.4	13.6					45.9756	18.718	9.6	9.118	37.0136	9.8	27.2136
	46.678	24.66	11	13.66	41.96	6.15	35.81					34.0595	29.414	19.75	9.664	21.364	6.4	14.964					46.0751	17.22	9.6	7.62	40.46	9.8	30.66
	46.779	25.66	11	14.66	45.98	6.15	39.83					34.1331	28.02	19.75	8.27	17.68	6.4	11.28					46.1746	20.877	9.6	11.277	45.4547	9.8	35.6547
	46.879	26	11	15	47.66	6.15	41.51					34.2066	28.88	19.75	9.13	22.64	6.4	16.24					46.2741	25.6	9.6	16	38.6	9.8	28.8
	46.98	27.32	11	16.32	50.64	6.15	44.49					34.2802	26	19.75	6.25	21	6.4	14.6					46.3736	21.08	9.6	11.48	33.12	9.8	23.32
	47.081	35.26	11	24.26	48.04	6.15	41.89					34.3537	29	19.75	9.25	21	6.4	14.6					46.4732	23.14	9.6	13.54	27.94	9.8	18.14
	47.182	54.84	11	43.84	39.4	6.15	33.25					34.4273	29	19.75	9.25	22	6.4	15.6					46.5727	23.44	9.6	13.84	26.64	9.8	16.84
	47.283	77.52	11	66.52	39.3	6.15	33.15					34.5009	31	19.75	11.25	20	6.4	13.6					46.6722	23.78	9.6	14.18	34.92	9.8	25.12
	47.384	74.44	11	63.44	42.32	6.15	36.17					34.5744	26	19.75	6.25	26	6.4	19.6					46.7717	26.105	9.6	16.505	42.2354	9.8	32.4354
	47.484	55.14	11	44.14	44.98	6.15	38.83					34.648	27	19.75	7.25	20	6.4	13.6					46.8712	28	9.6	18.4	49.5	9.8	39.7
	47.585	60.54	11	49.54	56.56	6.15	50.41					34.7216	28	19.75	8.25	17	6.4	10.6					46.9707	21.04	9.6	11.44	61.05	9.8	51.25
	47.686	63.7	11	52.7	65.96	6.15	59.81					34.7951	29	19.75	9.25	34	6.4	27.6					47.0703	22.97	9.6	13.37	54.09	9.8	44.29
	47.787	71.9	11	60.9	70.64	6.15	64.49					34.8687	27.293	19.75	7.543	43.278	6.4	36.878					47.1698	19.71	9.6	10.11	67.0907	9.8	57.2907
	47.888	75.68	11	64.68	65.4	6.15	59.25					34.9422	26	19.75	6.25	53.94	6.4	47.54					47.2693	18.65	9.6	9.05	66.5	9.8	56.7
	47.988	74.34	11	63.34	50.12	6.15	43.97					35.0158	24.12	19.75	4.37	41.02	6.4	34.62					47.3688	17.935	9.6	8.335	70.1462	9.8	60.3462
	48.089	70.836	11	59.836	47.63	6.15	41.48					35.0894	25.88	19.75	6.13	30.6	6.4	24.2					47.4683	12.535	9.6	2.935	78.039	9.8	68.239
	48.19	55.81	11	44.81	50.83	6.15	44.68					35.1629	26	19.75	6.25	24	6.4	17.6					47.5678	15.569	9.6	5.969	61.839	9.8	52.039
	48.291	37.93	11	26.93	56.8	6.15	50.65					35.2365	34	19.75	14.25	20	6.4	13.6					47.6673	17.84	9.6	8.24	52.56	9.8	42.76
	48.392	32.73	11	21.73	65.88	6.15	59.73					35.3101	30	19.75	10.25	16	6.4	9.6					47.7668	16.16	9.6	6.56	47.4	9.8	37.6
	48.493	41.29	11	30.29	57.88	6.15	51.73					35.3836	34.864	19.75	15.114	21.328	6.4	14.928					47.8664	19	9.6	9.4	50	9.8	40.2
	48.593	45.66	11	34.66	60.02	6.15	53.87					35.4572	32.038	19.75	12.288	20.065	6.4	13.665					47.9659	17	9.6	7.4	50	9.8	40.2
	48.694	43.56	11	32.56	74.51	6.15	68.36					35.5307	30.555	19.75	10.805	18.632	6.4	12.232					48.0654	17.207	9.6	7.607	46.4645	9.8	36.6645
	48.795	48.73	11	37.73	77.66	6.15	71.51					35.6043	30.691	19.75	10.941	12.458	6.4	6.058					48.1649	15.68	9.6	6.08	34.44	9.8	24.64
	48.896	56.12	11	45.12	68.54	6.15	62.39					35.6779	29.18	19.75	9.43	16.56	6.4	10.16					48.2644	18.76	9.6	9.16	29.94	9.8	20.14
	48.997	57.1	11	46.1	62.73	6.15	56.58					35.7514	32.92	19.75	13.17	18	6.4	11.6					48.3639	20	9.6	10.4	30	9.8	20.2
	49.097	47.49	11	36.49	67.78	6.15	61.63					35.825	30.83	19.75	11.08	20.94	6.4	14.54					48.4635	19	9.6	9.4	28	9.8	18.2
	49.198	38.1	11	27.1	67.05	6.15	60.9					35.8986	32.65	19.75	12.9	21	6.4	14.6					48.563	20.914	9.6	11.314	31.0711	9.8	21.2711
	49.299	36.29	11	25.29	65.56	6.15	59.41					35.9721	30.18	19.75	10.43	31.34	6.4	24.94					48.6625	21.271	9.6	11.671	39.8027	9.8	30.0027
	49.4	43	11	32	66.05	6.15	59.9					36.0457	29	19.75	9.25	26	6.4	19.6					48.762	21.428	9.6	11.828	49.0975	9.8	39.2975
	49.501	44.56	11	33.56	59.49	6.15	53.34					36.1192	27	19.75	7.25	28	6.4	21.6					48.8615	20.613	9.6	11.013	52.9335	9.8	43.1335
	49.601	46.22	11	35.22	50.49	6.15	44.34					36.1928	28.621	19.75	8.871	26.086	6.4	19.686					48.961	21.82	9.6	12.22	55.18	9.8	45.38
	49.702	43.05	11	32.05	43.44	6.15	37.29					36.2664	29.66	19.75	9.91	22.36	6.4	15.96					49.0605	19.485	9.6	9.885	55.7478	9.8	45.9478
	49.803	37.66	11	26.66	40.61	6.15	34.46					36.3399	31.88	19.75	12.13	23.82	6.4	17.42					49.16	19.94	9.6	10.34	46.94	9.8	37.14
	49.904	32.83	11	21.83	40	6.15	33.85					36.4135	27	19.75	7.25	23	6.4	16.6					49.2596	21.64	9.6	12.04	37.2	9.8	27.4
	50.005	32.95	11	21.95	41.56	6.15	35.41					36.4871	28	19.75	8.25	24	6.4	17.6					49.3591	22	9.6	12.4	33.36	9.8	23.56
	50.106	41.53	11	30.53	42.42	6.15	36.27					36.5606	31	19.75	11.25	27	6.4	20.6					49.4586	18.04	9.6	8.44	26.07	9.8	16.27
	50.206	61.62	11	50.62	37.1	6.15	30.95					36.6342	31.257	19.75	11.507	22.343	6.4	15.943					49.5581	22	9.6	12.4	33	9.8	23.2
	50.307	68.86	11	57.86	39.94	6.15	33.79					36.7077	30.04	19.75	10.29	19.68	6.4	13.28					49.6576	18.672	9.6	9.072	32.2574	9.8	22.4574
	50.408	88.6	11	77.6	46.86	6.15	40.71					36.7813	28	19.75	8.25	17.12	6.4	10.72					49.7571	18.98	9.6	9.38	35.98	9.8	26.18
	50.509	70.38	11	59.38	62.68	6.15	56.53					36.8549	28	19.75	8.25	17	6.4	10.6					49.8567	22.82	9.6	13.22	33.24	9.8	23.44
	50.61	53.129	11	42.129	70.21	6.15	64.06					36.9284	30.121	19.75	10.371	16.707	6.4	10.307					49.9562	26	9.6	16.4	30	9.8	20.2
	50.71	51.597	11	40.597	72.21	6.15	66.06					37.002	31	19.75	11.25	16	6.4	9.6					50.0557	40	9.6	30.4	35	9.8	25.2
	50.811	54.78	11	43.78	62.12	6.15	55.97					37.0756	28.18	19.75	8.43	21.64	6.4	15.24					50.1552	46	9.6	36.4	38	9.8	28.2
	50.912	52.02	11	41.02	57.02	6.15	50.87					37.1491	29	19.75	9.25	19	6.4	12.6					50.2547	49	9.6	39.4	28	9.8	18.2
	51.013	43.68	11	32.68	48.46	6.15	42.31					37.2227	35	19.75	15.25	22	6.4	15.6					50.3542	42	9.6	32.4	42	9.8	32.2
	51.114	37.68	11	26.68	43	6.15	36.85					37.2962	35	19.75	15.25	20	6.4	13.6					50.4537	57	9.6	47.4	28	9.8	18.2
	51.215	33	11	22	45.2	6.15	39.05					37.3698	32	19.75	12.25	21	6.4	14.6					50.5532	72	9.6	62.4	36	9.8	26.2
	51.315	33.66	11	22.66	56.52	6.15	50.37					37.4434	31	19.75	11.25	17	6.4	10.6					50.6528	82	9.6	72.4	32	9.8	22.2
	51.416	34.76	11	23.76	64.66	6.15	58.51					37.5169	35	19.75	15.25	22	6.4	15.6					50.7523	74	9.6	64.4	48	9.8	38.2
	51.517	54.24	11	43.24	62.92	6.15	56.77					37.5905	33	19.75	13.25	27	6.4	20.6					50.8518	69	9.6	59.4	39	9.8	29.2
	51.618	55	11	44	62	6.15	55.85					37.6641	34	19.75	14.25	31	6.4	24.6					50.9513	48	9.6	38.4	52	9.8	42.2
	51.719	74	11	63	67	6.15	60.85					37.7376	45	19.75	25.25	49	6.4	42.6					51.0508	33	9.6	23.4	59	9.8	49.2
	51.819	93	11	82	61	6.15	54.85					37.8112	33	19.75	13.25	52	6.4	45.6					51.1503	23	9.6	13.4	41	9.8	31.2
	51.92	100	11	89	58	6.15	51.85					37.8848	35.657	19.75	15.907	55.399	6.4	48.999					51.2499	19	9.6	9.4	50	9.8	40.2
	52.021	111	11	100	53	6.15	46.85					37.9583	37.64	19.75	17.89	56.96	6.4	50.56					51.3494	21	9.6	11.4	45	9.8	35.2
	52.122	128.652	11	117.652	58.722	6.15	52.572					38.0319	33.36	19.75	13.61	59	6.4	52.6					51.4489	21	9.6	11.4	61	9.8	51.2
	52.223	122.818	11	111.818	61.178	6.15	55.028					38.1054	37	19.75	17.25	47	6.4	40.6					51.5484	22	9.6	12.4	74	9.8	64.2
	52.324	114.2	11	103.2	72.14	6.15	65.99					38.179	33	19.75	13.25	43	6.4	36.6					51.6479	29	9.6	19.4	72	9.8	62.2
	52.424	97.3	11	86.3	56.38	6.15	50.23					38.2526	33	19.75	13.25	38	6.4	31.6					51.7474	32	9.6	22.4	61	9.8	51.2
	52.525	93.799	11	82.799	46.195	6.15	40.045					38.3261	36.485	19.75	16.735	38.414	6.4	32.014					51.8469	24	9.6	14.4	58	9.8	48.2
	52.626	86.964	11	75.964	38.964	6.15	32.814					38.3997	35.66	19.75	15.91	39.98	6.4	33.58					51.9464	35	9.6	25.4	51	9.8	41.2
	52.727	76.76	11	65.76	47.24	6.15	41.09					38.4733	40.7	19.75	20.95	46.64	6.4	40.24					52.046	56	9.6	46.4	52	9.8	42.2
	52.828	70.92	11	59.92	51.54	6.15	45.39					38.5468	40.06	19.75	20.31	48.88	6.4	42.48					52.1455	65	9.6	55.4	41	9.8	31.2
	52.928	70	11	59	47.38	6.15	41.23					38.6204	38	19.75	18.25	45	6.4	38.6					52.245	75	9.6	65.4	55	9.8	45.2
	53.029	59.99	11	48.99	51.39	6.15	45.24					38.6939	36	19.75	16.25	40	6.4	33.6					52.3445	95	9.6	85.4	69	9.8	59.2
	53.13	50.84	11	39.84	44.53	6.15	38.38					38.7675	32.672	19.75	12.922	35.172	6.4	28.772					52.444	73	9.6	63.4	59	9.8	49.2
	53.231	47.748	11	36.748	41.167	6.15	35.017					38.8411	31.66	19.75	11.91	32	6.4	25.6					52.5435	61	9.6	51.4	50	9.8	40.2
	53.332	47.47	11	36.47	36.43	6.15	30.28					38.9146	28.24	19.75	8.49	29.18	6.4	22.78					52.6431	49	9.6	39.4	42	9.8	32.2
	53.432	50.47	11	39.47	41.47	6.15	35.32					38.9882	25	19.75	5.25	29	6.4	22.6					52.7426	34	9.6	24.4	48	9.8	38.2
	53.533	49.06	11	38.06	41.53	6.15	35.38					39.0618	24.914	19.75	5.164	32.536	6.4	26.136					52.8421	35	9.6	25.4	42	9.8	32.2
	53.634	43.06	11	32.06	49.8	6.15	43.65					39.1353	24.66	19.75	4.91	29.38	6.4	22.98					52.9416	35	9.6	25.4	44	9.8	34.2
	53.735	39.02	11	28.02	75.68	6.15	69.53					39.2089	25	19.75	5.25	23.7	6.4	17.3					53.0411	37	9.6	27.4	37	9.8	27.2
	53.836	38.49	11	27.49	92.98	6.15	86.83					39.2824	23.202	19.75	3.452	18.437	6.4	12.037					53.1406	38	9.6	28.4	29	9.8	19.2
	53.937	42.92	11	31.92	89.1	6.15	82.95					39.356	22.78	19.75	3.03	15.66	6.4	9.26					53.2401	36	9.6	26.4	20	9.8	10.2
	54.037	41.61	11	30.61	83.02	6.15	76.87					39.4296	24.221	19.75	4.471	10.669	6.4	4.269					53.3396	64	9.6	54.4	23	9.8	13.2
	54.138	32.08	11	21.08	75.63	6.15	69.48					39.5031	26	19.75	6.25	12.16	6.4	5.76					53.4392	98	9.6	88.4	27	9.8	17.2
	54.239	30.45	11	19.45	64.1	6.15	57.95					39.5767	26.76	19.75	7.01	14	6.4	7.6					53.5387	111	9.6	101.4	42	9.8	32.2
	54.34	33.98	11	22.98	51.16	6.15	45.01					39.6503	31.9	19.75	12.15	14.78	6.4	8.38					53.6382	103	9.6	93.4	47	9.8	37.2
	54.441	32.06	11	21.06	46.92	6.15	40.77					39.7238	33	19.75	13.25	16.56	6.4	10.16					53.7377	81.287	9.6	71.687	42.5858	9.8	32.7858
	54.541	28.02	11	17.02	61.78	6.15	55.63					39.7974	33	19.75	13.25	20.9	6.4	14.5					53.8372	51.248	9.6	41.648	42.8265	9.8	33.0265
	54.642	27	11	16	100.93	6.15	94.78					39.8709	28.32	19.75	8.57	39.16	6.4	32.76					53.9367	30.074	9.6	20.474	58.0799	9.8	48.2799
	54.743	27.49	11	16.49	135.88	6.15	129.73					39.9445	27.78	19.75	8.03	44.78	6.4	38.38					54.0362	19.032	9.6	9.432	62.4557	9.8	52.6557
	54.844	25.55	11	14.55	123.87	6.15	117.72					40.0181	32.68	19.75	12.93	48.12	6.4	41.72					54.1358	18.28	9.6	8.68	54.9	9.8	45.1
	54.945	23.98	11	12.98	76.09	6.15	69.94					40.0916	35.56	19.75	15.81	49.78	6.4	43.38					54.2353	20.64	9.6	11.04	49.9	9.8	40.1
	55.046	23.04	11	12.04	39.14	6.15	32.99					40.1652	34.44	19.75	14.69	53.12	6.4	46.72					54.3348	21.82	9.6	12.22	51.46	9.8	41.66
	55.146	22.96	11	11.96	37.39	6.15	31.24					40.2388	38.68	19.75	18.93	51.66	6.4	45.26					54.4343	23.96	9.6	14.36	51.02	9.8	41.22
	55.247	24.51	11	13.51	46.43	6.15	40.28					40.3123	40.587	19.75	20.837	45.131	6.4	38.731					54.5338	25	9.6	15.4	44	9.8	34.2
	55.348	24	11	13	55.39	6.15	49.24					40.3859	37.5	19.75	17.75	48.5	6.4	42.1					54.6333	23.586	9.6	13.986	46.5355	9.8	36.7355
	55.449	24	11	13	60.51	6.15	54.36					40.4594	38	19.75	18.25	64.5	6.4	58.1					54.7328	24.32	9.6	14.72	42.38	9.8	32.58
	55.55	27.43	11	16.43	56.08	6.15	49.93					40.533	42.021	19.75	22.271	83.947	6.4	77.547					54.8324	25.783	9.6	16.183	45.4116	9.8	35.6116
	55.65	28.06	11	17.06	37.3	6.15	31.15					40.6066	47.86	19.75	28.11	108.96	6.4	102.56					54.9319	24.66	9.6	15.06	51.17	9.8	41.37
	55.751	25.49	11	14.49	17.59	6.15	11.44					40.6801	61.52	19.75	41.77	122.12	6.4	115.72					55.0314	21.666	9.6	12.066	52.2268	9.8	42.4268
	55.852	25.14	11	14.14	14.72	6.15	8.57					40.7537	67.18	19.75	47.43	110.32	6.4	103.92					55.1309	21.617	9.6	12.017	45.5369	9.8	35.7369
	55.953	25	11	14	13.02	6.15	6.87					40.8273	61.298	19.75	41.548	91.136	6.4	84.736					55.2304	26.063	9.6	16.463	38.8787	9.8	29.0787
	56.054	26.98	11	15.98	13.99	6.15	7.84					40.9008	57.6	19.75	37.85	69.5	6.4	63.1					55.3299	30.04	9.6	20.44	35.56	9.8	25.76
	56.155	25.02	11	14.02	16.97	6.15	10.82					40.9744	52.2	19.75	32.45	60.2	6.4	53.8					55.4294	44.48	9.6	34.88	35	9.8	25.2
	56.255	25	11	14	22.94	6.15	16.79					41.0479	45.6	19.75	25.85	53.6	6.4	47.2					55.529	58.269	9.6	48.669	48.4452	9.8	38.6452
	56.356	23.02	11	12.02	18.05	6.15	11.9					41.1215	37.68	19.75	17.93	41.12	6.4	34.72					55.6285	71.28	9.6	61.68	66.04	9.8	56.24
	56.457	25	11	14	23	6.15	16.85					41.1951	30.18	19.75	10.43	41.88	6.4	35.48					55.728	77.58	9.6	67.98	56.05	9.8	46.25
	56.558	22	11	11	20	6.15	13.85					41.2686	35	19.75	15.25	33	6.4	26.6					55.8275	51	9.6	41.4	51	9.8	41.2
	56.659	21	11	10	22	6.15	15.85					41.3422	33	19.75	13.25	47	6.4	40.6					55.927	50	9.6	40.4	39	9.8	29.2
	56.759	21	11	10	20	6.15	13.85					41.4158	37	19.75	17.25	64	6.4	57.6					56.0265	39	9.6	29.4	27	9.8	17.2
	56.86	21	11	10	22	6.15	15.85					41.4893	31	19.75	11.25	45	6.4	38.6					56.126	36	9.6	26.4	21	9.8	11.2
	56.961	21	11	10	31	6.15	24.85					41.5629	28	19.75	8.25	48	6.4	41.6					56.2256	27	9.6	17.4	27	9.8	17.2
	57.062	25	11	14	19	6.15	12.85					41.6364	27.293	19.75	7.543	34.565	6.4	28.165					56.3251	22	9.6	12.4	29	9.8	19.2
	57.163	22	11	11	13	6.15	6.85					41.71	27	19.75	7.25	29	6.4	22.6					56.4246	19	9.6	9.4	38	9.8	28.2
	57.263	25	11	14	12	6.15	5.85					41.7836	27.749	19.75	7.999	28.217	6.4	21.817					56.5241	16.5	9.6	6.9	39.5	9.8	29.7
	57.364	25	11	14	9	6.15	2.85					41.8571	27.39	19.75	7.64	28.95	6.4	22.55					56.6236	21.92	9.6	12.32	52.22	9.8	42.42
	57.465	26	11	15	9	6.15	2.85					41.9307	30.34	19.75	10.59	33.17	6.4	26.77					56.7231	22.187	9.6	12.587	69.539	9.8	59.739
	57.566	28.142	11	17.142	12.061	6.15	5.911					42.0043	37.95	19.75	18.2	31.05	6.4	24.65					56.8226	20.83	9.6	11.23	81.46	9.8	71.66
	57.667	28.978	11	17.978	16.939	6.15	10.789					42.0778	39	19.75	19.25	34.9	6.4	28.5					56.9222	21.217	9.6	11.617	81.1402	9.8	71.3402
	57.768	28.13	11	17.13	19	6.15	12.85					42.1514	39	19.75	19.25	43.82	6.4	37.42					57.0217	23.24	9.6	13.64	57.92	9.8	48.12
	57.868	26.26	11	15.26	22.48	6.15	16.33					42.2249	41.73	19.75	21.98	56.25	6.4	49.85					57.1212	26.078	9.6	16.478	55.6475	9.8	45.8475
	57.969	24.26	11	13.26	18.65	6.15	12.5					42.2985	42.094	19.75	22.344	64.921	6.4	58.521					57.2207	26.785	9.6	17.185	40.5766	9.8	30.7766
	58.07	25.74	11	14.74	17.13	6.15	10.98					42.3721	44.75	19.75	25	70.673	6.4	64.273					57.3202	25.995	9.6	16.395	30.7753	9.8	20.9753
	58.171	21.65	11	10.65	16.13	6.15	9.98					42.4456	50.333	19.75	30.583	67.548	6.4	61.148					57.4197	24.76	9.6	15.16	30.36	9.8	20.56
	58.272	22.909	11	11.909	26.24	6.15	20.09					42.5192	45.52	19.75	25.77	78.53	6.4	72.13					57.5192	24.39	9.6	14.79	37.93	9.8	28.13
	58.372	24.57	11	13.57	32.14	6.15	25.99					42.5928	45.96	19.75	26.21	73.16	6.4	66.76					57.6188	25.03	9.6	15.43	42.91	9.8	33.11
	58.473	21.58	11	10.58	46.68	6.15	40.53					42.6663	43	19.75	23.25	84	6.4	77.6					57.7183	25	9.6	15.4	41	9.8	31.2
	58.574	18.1	11	7.1	48.9	6.15	42.75					42.7399	42	19.75	22.25	97	6.4	90.6					57.8178	21.55	9.6	11.95	27.6863	9.8	17.8863
	58.675	16.02	11	5.02	59.88	6.15	53.73					42.8134	36	19.75	16.25	86	6.4	79.6					57.9173	17.386	9.6	7.786	21	9.8	11.2
	58.776	21.94	11	10.94	56.04	6.15	49.89					42.887	40	19.75	20.25	108	6.4	101.6					58.0168	16.285	9.6	6.685	20.8126	9.8	11.0126
	58.877	22	11	11	48	6.15	41.85					42.9606	44	19.75	24.25	88	6.4	81.6					58.1163	14.082	9.6	4.482	26.8512	9.8	17.0512
	58.977	26	11	15	38	6.15	31.85					43.0341	43	19.75	23.25	69	6.4	62.6					58.2158	19.596	9.6	9.996	29.3587	9.8	19.5587
	59.078	27.121	11	16.121	41.435	6.15	35.285					43.1077	38	19.75	18.25	54	6.4	47.6					58.3154	19.85	9.6	10.25	39.47	9.8	29.67
	59.179	26.34	11	15.34	33.281	6.15	27.131					43.1813	34	19.75	14.25	51	6.4	44.6					58.4149	18.673	9.6	9.073	51.4715	9.8	41.6715
	59.28	26.46	11	15.46	33.99	6.15	27.84					43.2548	37	19.75	17.25	41	6.4	34.6					58.5144	20.61	9.6	11.01	46.78	9.8	36.98
	59.381	29.38	11	18.38	45.61	6.15	39.46					43.3284	32	19.75	12.25	41	6.4	34.6					58.6139	19.47	9.6	9.87	61.8	9.8	52
	59.481	37.2	11	26.2	50.36	6.15	44.21					43.4019	31	19.75	11.25	43	6.4	36.6					58.7134	22.365	9.6	12.765	76.049	9.8	66.249
	59.582	51.09	11	40.09	48.14	6.15	41.99					43.4755	31	19.75	11.25	40	6.4	33.6					58.8129	23.4	9.6	13.8	88.4	9.8	78.6
	59.683	68.74	11	57.74	49.86	6.15	43.71					43.5491	28	19.75	8.25	30	6.4	23.6					58.9124	29.6	9.6	20	73.4	9.8	63.6
	59.784	103.588	11	92.588	64.768	6.15	58.618					43.6226	23	19.75	3.25	29	6.4	22.6					59.012	31.4	9.6	21.8	49.6	9.8	39.8
	59.885	137.36	11	126.36	86.5	6.15	80.35					43.6962	23.793	19.75	4.043	28.964	6.4	22.564					59.1115	28.8	9.6	19.2	28.6	9.8	18.8
	59.986	168.46	11	157.46	98.48	6.15	92.33					43.7698	23.02	19.75	3.27	33.64	6.4	27.24					59.211	28.4	9.6	18.8	29.8	9.8	20
	60.086	155.58	11	144.58	99.38	6.15	93.23					43.8433	22.94	19.75	3.19	41.58	6.4	35.18					59.3105	30.2	9.6	20.6	25.4	9.8	15.6
	60.187	100.32	11	89.32	97.14	6.15	90.99					43.9169	21	19.75	1.25	41	6.4	34.6					59.41	32.4	9.6	22.8	28.4	9.8	18.6
	60.288	60.5	11	49.5	78.02	6.15	71.87					43.9904	23	19.75	3.25	33	6.4	26.6					59.5095	36.263	9.6	26.663	31.6817	9.8	21.8817
	60.389	43.56	11	32.56	62.66	6.15	56.51					44.064	24	19.75	4.25	30	6.4	23.6					59.609	31.472	9.6	21.872	30.9551	9.8	21.1551
	60.49	32.18	11	21.18	60.62	6.15	54.47					44.1376	27	19.75	7.25	29	6.4	22.6					59.7086	22.2	9.6	12.6	24.96	9.8	15.16
	60.59	27.036	11	16.036	58.025	6.15	51.875					44.2111	27	19.75	7.25	35	6.4	28.6					59.8081	28.04	9.6	18.44	33.68	9.8	23.88
	60.691	25.792	11	14.792	55.791	6.15	49.641					44.2847	29	19.75	9.25	27	6.4	20.6					59.9076	41.32	9.6	31.72	31.48	9.8	21.68
	60.792	28.62	11	17.62	46.89	6.15	40.74					44.3583	29	19.75	9.25	33	6.4	26.6					60.0071	69.4	9.6	59.8	28.36	9.8	18.56
	60.893	31.7	11	20.7	39.7	6.15	33.55					44.4318	31	19.75	11.25	40	6.4	33.6					60.1066	99.4	9.6	89.8	18.32	9.8	8.52
	60.994	37.4	11	26.4	29.1	6.15	22.95					44.5054	33	19.75	13.25	43	6.4	36.6					60.2061	104.76	9.6	95.16	28.44	9.8	18.64
	61.095	42.5	11	31.5	37	6.15	30.85					44.5789	36.536	19.75	16.786	50.485	6.4	44.085					60.3056	97.96	9.6	88.36	30.88	9.8	21.08
	61.195	48.4	11	37.4	44.3	6.15	38.15					44.6525	35.36	19.75	15.61	58.28	6.4	51.88					60.4052	88.2	9.6	78.6	34.52	9.8	24.72
	61.296	33.7	11	22.7	44.1	6.15	37.95					44.7261	40.994	19.75	21.244	65.646	6.4	59.246					60.5047	70.28	9.6	60.68	38.52	9.8	28.72
	61.397	37.925	11	26.925	38.814	6.15	32.664					44.7996	50.985	19.75	31.235	66.183	6.4	59.783					60.6042	49.52	9.6	39.92	39.88	9.8	30.08
	61.498	42.527	11	31.527	33.056	6.15	26.906					44.8732	56.529	19.75	36.779	57.555	6.4	51.155					60.7037	47.88	9.6	38.28	36.48	9.8	26.68
	61.599	55.5	11	44.5	30.7	6.15	24.55					44.9468	59.79	19.75	40.04	52.35	6.4	45.95					60.8032	34.8	9.6	25.2	42.16	9.8	32.36
	61.699	54.4	11	43.4	35.2	6.15	29.05					45.0203	54	19.75	34.25	53	6.4	46.6					60.9027	25.08	9.6	15.48	36.84	9.8	27.04
	61.8	87.15	11	76.15	46.5	6.15	40.35					45.0939	61	19.75	41.25	51	6.4	44.6					61.0022	24	9.6	14.4	41.28	9.8	31.48
	61.901	81.216	11	70.216	43.606	6.15	37.456					45.1674	63	19.75	43.25	50	6.4	43.6					61.1018	28.4	9.6	18.8	36.72	9.8	26.92
	62.002	55.1	11	44.1	49.56	6.15	43.41					45.241	64	19.75	44.25	47	6.4	40.6					61.2013	29	9.6	19.4	36	9.8	26.2
	62.103	37.07	11	26.07	56.52	6.15	50.37					45.3146	61	19.75	41.25	46	6.4	39.6					61.3008	33.4	9.6	23.8	28.96	9.8	19.16
	62.203	33	11	22	43.51	6.15	37.36					45.3881	53	19.75	33.25	41	6.4	34.6					61.4003	35.76	9.6	26.16	35.04	9.8	25.24
	62.304	36.15	11	25.15	28.7	6.15	22.55					45.4617	47	19.75	27.25	46	6.4	39.6					61.4998	35.12	9.6	25.52	25.44	9.8	15.64
	62.405	43.67	11	32.67	30.04	6.15	23.89					45.5353	45	19.75	25.25	49	6.4	42.6					61.5993	33.24	9.6	23.64	27.52	9.8	17.72
	62.506	57.08	11	46.08	31.11	6.15	24.96					45.6088	39	19.75	19.25	55	6.4	48.6					61.6988	31.24	9.6	21.64	17.44	9.8	7.64
	62.607	74.97	11	63.97	28.11	6.15	21.96					45.6824	45	19.75	25.25	57	6.4	50.6					61.7984	29.24	9.6	19.64	12.48	9.8	2.68
	62.708	80.11	11	69.11	28.26	6.15	22.11					45.756	48	19.75	28.25	52	6.4	45.6					61.8979	34.28	9.6	24.68	11.12	9.8	1.32
	62.808	82.78	11	71.78	25.22	6.15	19.07					45.8295	43	19.75	23.25	48	6.4	41.6					61.9974	37.64	9.6	28.04	11	9.8	1.2
	62.909	72.4	11	61.4	33.08	6.15	26.93					45.9031	38	19.75	18.25	46	6.4	39.6					62.0969	46.8	9.6	37.2	10.12	9.8	0.32
	63.01	57.56	11	46.56	41.79	6.15	35.64					45.9766	38.95	19.75	19.2	35.944	6.4	29.544					62.1964	39.2	9.6	29.6	8.24	9.8	-1.56
	63.111	66	11	55	45	6.15	38.85					46.0502	41.62	19.75	21.87	33.68	6.4	27.28					62.2959	43.28	9.6	33.68	7.12	9.8	-2.68
	63.212	63	11	52	49	6.15	42.85					46.1238	43.217	19.75	23.467	32.034	6.4	25.634					62.3954	40.04	9.6	30.44	7.99	9.8	-1.81
	63.312	62	11	51	51	6.15	44.85					46.1973	42.39	19.75	22.64	37.34	6.4	30.94					62.495	43.96	9.6	34.36	9.98	9.8	0.18
	63.413	51	11	40	61	6.15	54.85					46.2709	42.22	19.75	22.47	40.61	6.4	34.21					62.5945	35.09	9.6	25.49	20.89	9.8	11.09
	63.514	38.444	11	27.444	47.151	6.15	41.001					46.3445	40.22	19.75	20.47	42.34	6.4	35.94					62.694	30.05	9.6	20.45	17.04	9.8	7.24
	63.615	34.716	11	23.716	43.899	6.15	37.749					46.418	46.9	19.75	27.15	42.84	6.4	36.44					62.7935	26.04	9.6	16.44	16.01	9.8	6.21
	63.716	39.22	11	28.22	47.1	6.15	40.95					46.4916	42.14	19.75	22.39	42	6.4	35.6					62.893	25.01	9.6	15.41	19.96	9.8	10.16
	63.817	39.12	11	28.12	49.9	6.15	43.75					46.5651	48.86	19.75	29.11	40.04	6.4	33.64					62.9925	25.99	9.6	16.39	20.99	9.8	11.19
	63.917	35.78	11	24.78	45.12	6.15	38.97					46.6387	44.1	19.75	24.35	36.08	6.4	29.68					63.092	40.85	9.6	31.25	17.04	9.8	7.24
	64.018	35.041	11	24.041	42.196	6.15	36.046					46.7123	53	19.75	33.25	36	6.4	29.6					63.1916	30.11	9.6	20.51	13.04	9.8	3.24
	64.119	32.628	11	21.628	46.096	6.15	39.946					46.7858	54	19.75	34.25	57	6.4	50.6					63.2911	24.06	9.6	14.46	13	9.8	3.2
	64.22	32.9	11	21.9	32.6	6.15	26.45					46.8594	62	19.75	42.25	65	6.4	58.6					63.3906	30.93	9.6	21.33	14.98	9.8	5.18
	64.321	31.2	11	20.2	35.5	6.15	29.35					46.933	79	19.75	59.25	61	6.4	54.6					63.4901	29.02	9.6	19.42	12.03	9.8	2.23
	64.421	35.95	11	24.95	37.98	6.15	31.83					47.0065	82	19.75	62.25	84	6.4	77.6					63.5896	28.01	9.6	18.41	12	9.8	2.2
	64.522	38.52	11	27.52	46.26	6.15	40.11					47.0801	79.636	19.75	59.886	93.763	6.4	87.363					63.6891	24.04	9.6	14.44	12.99	9.8	3.19
	64.623	38.35	11	27.35	54.1	6.15	47.95					47.1536	82.98	19.75	63.23	84.76	6.4	78.36					63.7886	31	9.6	21.4	18	9.8	8.2
	64.724	36.463	11	25.463	78.43	6.15	72.28					47.2272	84.35	19.75	64.6	72.074	6.4	65.674					63.8882	20	9.6	10.4	16	9.8	6.2
	64.825	32.86	11	21.86	99.16	6.15	93.01					47.3008	88.753	19.75	69.003	68.906	6.4	62.506					63.9877	26	9.6	16.4	14	9.8	4.2
	64.926	29.86	11	18.86	76.6	6.15	70.45					47.3743	92.116	19.75	72.366	73.232	6.4	66.832					64.0872	20	9.6	10.4	12	9.8	2.2
	65.026	33.46	11	22.46	61.9	6.15	55.75					47.4479	80.91	19.75	61.16	65.63	6.4	59.23					64.1867	22	9.6	12.4	14	9.8	4.2
	65.127	35	11	24	38.5	6.15	32.35					47.5215	62.33	19.75	42.58	65.93	6.4	59.53					64.2862	19.5	9.6	9.9	11.8284	9.8	2.0284
	65.228	53	11	42	42	6.15	35.85					47.595	57.28	19.75	37.53	73.44	6.4	67.04					64.3857	18.32	9.6	8.72	9.32	9.8	-0.48
	65.329	77	11	66	37	6.15	30.85					47.6686	54	19.75	34.25	92	6.4	85.6					64.4852	20.88	9.6	11.28	12.82	9.8	3.02
	65.43	63	11	52	46	6.15	39.85					47.7421	57	19.75	37.25	101	6.4	94.6					64.5848	19	9.6	9.4	16	9.8	6.2
	65.53	58	11	47	59	6.15	52.85					47.8157	51	19.75	31.25	108	6.4	101.6					64.6843	24	9.6	14.4	12	9.8	2.2
	65.631	32	11	21	53	6.15	46.85					47.8893	47	19.75	27.25	100	6.4	93.6					64.7838	33	9.6	23.4	8	9.8	-1.8
	65.732	29	11	18	41	6.15	34.85					47.9628	54	19.75	34.25	114	6.4	107.6					64.8833	30	9.6	20.4	13	9.8	3.2
	65.833	25.257	11	14.257	35.136	6.15	28.986					48.0364	59.485	19.75	39.735	98.701	6.4	92.301					64.9828	24	9.6	14.4	12	9.8	2.2
	65.934	23.34	11	12.34	25.74	6.15	19.59					48.11	56.7	19.75	36.95	89.72	6.4	83.32					65.0823	26	9.6	16.4	12	9.8	2.2
	66.034	23.466	11	12.466	21.234	6.15	15.084					48.1835	61.6	19.75	41.85	81.06	6.4	74.66					65.1818	21	9.6	11.4	12	9.8	2.2
	66.135	21	11	10	22.95	6.15	16.8					48.2571	80.18	19.75	60.43	78	6.4	71.6					65.2814	16	9.6	6.4	10	9.8	0.2
	66.236	20.334	11	9.334	27.218	6.15	21.068					48.3306	98.56	19.75	78.81	79.98	6.4	73.58					65.3809	18	9.6	8.4	13	9.8	3.2
	66.337	20.68	11	9.68	31.32	6.15	25.17					48.4042	117.2	19.75	97.45	84.96	6.4	78.56					65.4804	14	9.6	4.4	13	9.8	3.2
	66.438	17.078	11	6.078	34.898	6.15	28.748					48.4778	125.32	19.75	105.57	85.68	6.4	79.28					65.5799	17	9.6	7.4	13	9.8	3.2
	66.539	17.785	11	6.785	31.751	6.15	25.601					48.5513	120.06	19.75	100.31	73.12	6.4	66.72					65.6794	18	9.6	8.4	8	9.8	-1.8
	66.639	19.725	11	8.725	23.55	6.15	17.4					48.6249	93.24	19.75	73.49	57.1	6.4	50.7					65.7789	19	9.6	9.4	8.9497	9.8	-0.8503
	66.74	21.56	11	10.56	18.92	6.15	12.77					48.6985	68.46	19.75	48.71	38.8	6.4	32.4					65.8784	17.36	9.6	7.76	10.96	9.8	1.16
	66.841	18.23	11	7.23	17	6.15	10.85					48.772	58.7	19.75	38.95	34.64	6.4	28.24					65.978	16.66	9.6	7.06	14.98	9.8	5.18
	66.942	19.94	11	8.94	17	6.15	10.85					48.8456	54.36	19.75	34.61	36.66	6.4	30.26					66.0775	18.482	9.6	8.882	9.6061	9.8	-0.1939
	67.043	19	11	8	25	6.15	18.85					48.9191	57.7	19.75	37.95	48.28	6.4	41.88					66.177	16.78	9.6	7.18	6.61	9.8	-3.19
	67.143	22	11	11	38	6.15	31.85					48.9927	70	19.75	50.25	51	6.4	44.6					66.2765	19.17	9.6	9.57	6.78	9.8	-3.02
	67.244	22	11	11	58	6.15	51.85					49.0663	80	19.75	60.25	59	6.4	52.6					66.376	19.42	9.6	9.82	13.53	9.8	3.73
	67.345	20	11	9	46	6.15	39.85					49.1398	70	19.75	50.25	65	6.4	58.6					66.4755	22.92	9.6	13.32	25.78	9.8	15.98
	67.446	15.964	11	4.964	49.328	6.15	43.178					49.2134	57	19.75	37.25	53	6.4	46.6					66.5751	23	9.6	13.4	38.74	9.8	28.94
	67.547	16.64	11	5.64	60.9	6.15	54.75					49.287	51	19.75	31.25	61	6.4	54.6					66.6746	25.94	9.6	16.34	27.24	9.8	17.44
	67.648	20.64	11	9.64	56.76	6.15	50.61					49.3605	38	19.75	18.25	56	6.4	49.6					66.7741	30.9	9.6	21.3	26.02	9.8	16.22
	67.748	23.32	11	12.32	49.36	6.15	43.21					49.4341	37	19.75	17.25	59	6.4	52.6					66.8736	31	9.6	21.4	23	9.8	13.2
	67.849	23.34	11	12.34	51.3	6.15	45.15					49.5076	35.828	19.75	16.078	59.5	6.4	53.1					66.9731	29	9.6	19.4	27	9.8	17.2
	67.95	22.34	11	11.34	60.26	6.15	54.11					49.5812	39.6	19.75	19.85	69.24	6.4	62.84					67.0726	20.222	9.6	10.622	29.864	9.8	20.064
	68.051	20.02	11	9.02	58.72	6.15	52.57					49.6548	52.24	19.75	32.49	93.14	6.4	86.74					67.1721	16.66	9.6	7.06	29.66	9.8	19.86
	68.152	21.64	11	10.64	52.7	6.15	46.55					49.7283	62.94	19.75	43.19	120.82	6.4	114.42					67.2716	16.06	9.6	6.46	26.24	9.8	16.44
	68.252	21.68	11	10.68	46.38	6.15	40.23					49.8019	77.22	19.75	57.47	128.02	6.4	121.62					67.3712	17	9.6	7.4	30	9.8	20.2
	68.353	22.32	11	11.32	32.12	6.15	25.97					49.8755	88.94	19.75	69.19	121.72	6.4	115.32					67.4707	20.157	9.6	10.557	24.6863	9.8	14.8863
	68.454	23.516	11	12.516	27.815	6.15	21.665					49.949	105.2	19.75	85.45	113.06	6.4	106.66					67.5702	27.92	9.6	18.32	22.04	9.8	12.24
	68.555	22.44	11	11.44	38.58	6.15	32.43					50.0226	112.66	19.75	92.91	102.74	6.4	96.34					67.6697	51.14	9.6	41.54	18.68	9.8	8.88
	68.656	20.681	11	9.681	62.118	6.15	55.968					50.0961	111.68	19.75	91.93	89.76	6.4	83.36					67.7692	74.16	9.6	64.56	22.7	9.8	12.9
	68.757	21.193	11	10.193	73.474	6.15	67.324					50.1697	86.56	19.75	66.81	67.14	6.4	60.74					67.8687	89	9.6	79.4	25	9.8	15.2
	68.857	19.6	11	8.6	67.4	6.15	61.25					50.2433	69	19.75	49.25	86	6.4	79.6					67.9682	91	9.6	81.4	21	9.8	11.2
	68.958	18	11	7	61.6	6.15	55.45					50.3168	61	19.75	41.25	94	6.4	87.6					68.0678	64	9.6	54.4	26	9.8	16.2
	69.059	18.2	11	7.2	47	6.15	40.85					50.3904	68	19.75	48.25	105	6.4	98.6					68.1673	41.216	9.6	31.616	23	9.8	13.2
	69.16	20	11	9	41.6	6.15	35.45					50.464	77	19.75	57.25	120	6.4	113.6					68.2668	27.74	9.6	18.14	21.32	9.8	11.52
	69.261	23.4	11	12.4	36.2	6.15	30.05					50.5375	74.672	19.75	54.922	130.885	6.4	124.485					68.3663	18.622	9.6	9.022	22.6824	9.8	12.8824
	69.361	21.6	11	10.6	37.4	6.15	31.25					50.6111	70.04	19.75	50.29	121.76	6.4	115.36					68.4658	16.78	9.6	7.18	21.51	9.8	11.71
	69.462	22.8	11	11.8	40.6	6.15	34.45					50.6846	66.12	19.75	46.37	103.84	6.4	97.44					68.5653	17.22	9.6	7.62	23.88	9.8	14.08
	69.563	18.6	11	7.6	48	6.15	41.85					50.7582	72.159	19.75	52.409	97.787	6.4	91.387					68.6648	16.79	9.6	7.19	14.26	9.8	4.46
	69.664	21.2	11	10.2	51.2	6.15	45.05					50.8318	87.133	19.75	67.383	85.148	6.4	78.748					68.7644	15.04	9.6	5.44	13.98	9.8	4.18
	69.765	21.8	11	10.8	51	6.15	44.85					50.9053	96.94	19.75	77.19	77.54	6.4	71.14					68.8639	14.02	9.6	4.42	23.8	9.8	14
	69.866	21.4	11	10.4	63	6.15	56.85					50.9789	80.337	19.75	60.587	81.407	6.4	75.007					68.9634	16.94	9.6	7.34	33.8	9.8	24
	69.966	23.6	11	12.6	64.2	6.15	58.05					51.0525	74.909	19.75	55.159	89.984	6.4	83.584					69.0629	14	9.6	4.4	31	9.8	21.2
	70.067	26.266	11	15.266	67.956	6.15	61.806					51.126	74.14	19.75	54.39	96.3	6.4	89.9					69.1624	18	9.6	8.4	34	9.8	24.2
	70.168	25.401	11	14.401	51.342	6.15	45.192					51.1996	77.298	19.75	57.548	103.191	6.4	96.791					69.2619	15	9.6	5.4	35	9.8	25.2
	70.269	22.248	11	11.248	43.425	6.15	37.275					51.2731	72.44	19.75	52.69	112.85	6.4	106.45					69.3615	12	9.6	2.4	31	9.8	21.2
	70.37	21.06	11	10.06	35.43	6.15	29.28					51.3467	63.6	19.75	43.85	124.9	6.4	118.5					69.461	13	9.6	3.4	39	9.8	29.2
	70.47	21.15	11	10.15	36.936	6.15	30.786					51.4203	63.99	19.75	44.24	128.97	6.4	122.57					69.5605	17	9.6	7.4	21	9.8	11.2
	70.571	23	11	12	45.72	6.15	39.57					51.4938	60.22	19.75	40.47	148.181	6.4	141.781					69.66	22	9.6	12.4	39	9.8	29.2
	70.672	23.69	11	12.69	47.07	6.15	40.92					51.5674	71	19.75	51.25	153.75	6.4	147.35					69.7595	14	9.6	4.4	14	9.8	4.2
	70.773	27.45	11	16.45	41.1	6.15	34.95					51.641	68.9	19.75	49.15	139.65	6.4	133.25					69.859	21	9.6	11.4	34	9.8	24.2
	70.874	26.15	11	15.15	34.2	6.15	28.05					51.7145	56.2	19.75	36.45	103.1	6.4	96.7					69.9585	15	9.6	5.4	27	9.8	17.2
	70.974	30	11	19	50	6.15	43.85					51.7881	48.677	19.75	28.927	72.985	6.4	66.585					70.058	18.95	9.6	9.35	22.0503	9.8	12.2503
	71.075	29.414	11	18.414	79.042	6.15	72.892					51.8616	44.198	19.75	24.448	60.234	6.4	53.834					70.1576	22.467	9.6	12.867	24.4842	9.8	14.6842
	71.176	28.899	11	17.899	102.101	6.15	95.951					51.9352	41.562	19.75	21.812	73.991	6.4	67.591					70.2571	21.39	9.6	11.79	32.91	9.8	23.11
	71.277	29.88	11	18.88	116.26	6.15	110.11					52.0088	43.76	19.75	24.01	76.92	6.4	70.52					70.3566	15.36	9.6	5.76	44.72	9.8	34.92
	71.378	32.56	11	21.56	97.72	6.15	91.57					52.0823	41	19.75	21.25	93	6.4	86.6					70.4561	20.58	9.6	10.98	43.07	9.8	33.27
	71.479	30.56	11	19.56	78.78	6.15	72.63					52.1559	49	19.75	29.25	111	6.4	104.6					70.5556	16.35	9.6	6.75	40.21	9.8	30.41
	71.579	28.12	11	17.12	85.04	6.15	78.89					52.2295	62	19.75	42.25	120	6.4	113.6					70.6551	20	9.6	10.4	45	9.8	35.2
	71.68	24.763	11	13.763	110.437	6.15	104.287					52.303	63	19.75	43.25	109	6.4	102.6					70.7546	22	9.6	12.4	67	9.8	57.2
	71.781	23.276	11	12.276	109.438	6.15	103.288					52.3766	60	19.75	40.25	97	6.4	90.6					70.8542	18	9.6	8.4	74	9.8	64.2
	71.882	26.218	11	15.218	89.266	6.15	83.116					52.4501	55	19.75	35.25	87	6.4	80.6					70.9537	23	9.6	13.4	103	9.8	93.2
	71.983	27.92	11	16.92	74.06	6.15	67.91					52.5237	55	19.75	35.25	71	6.4	64.6					71.0532	23	9.6	13.4	83	9.8	73.2
	72.083	25.38	11	14.38	60.36	6.15	54.21					52.5973	83	19.75	63.25	87	6.4	80.6					71.1527	26	9.6	16.4	81	9.8	71.2
	72.184	24	11	13	70.8	6.15	64.65					52.6708	120	19.75	100.25	100	6.4	93.6					71.2522	18	9.6	8.4	53	9.8	43.2
	72.285	23.01	11	12.01	60.13	6.15	53.98					52.7444	152	19.75	132.25	121	6.4	114.6					71.3517	17	9.6	7.4	61	9.8	51.2
	72.386	29.93	11	18.93	53.07	6.15	46.92					52.818	184	19.75	164.25	121	6.4	114.6					71.4512	24	9.6	14.4	53	9.8	43.2
	72.487	34.95	11	23.95	54.98	6.15	48.83					52.8915	206	19.75	186.25	128	6.4	121.6					71.5508	34	9.6	24.4	64	9.8	54.2
	72.588	33.02	11	22.02	57.97	6.15	51.82					52.9651	206	19.75	186.25	105	6.4	98.6					71.6503	32	9.6	22.4	56	9.8	46.2
	72.688	33.99	11	22.99	74.83	6.15	68.68					53.0387	198	19.75	178.25	111	6.4	104.6					71.7498	34	9.6	24.4	38	9.8	28.2
	72.789	36.97	11	25.97	74.01	6.15	67.86					53.1122	163	19.75	143.25	95	6.4	88.6					71.8493	33	9.6	23.4	43	9.8	33.2
	72.89	30.07	11	19.07	72.02	6.15	65.87					53.1858	120	19.75	100.25	89	6.4	82.6					71.9488	36	9.6	26.4	28	9.8	18.2
	72.991	30.99	11	19.99	72.99	6.15	66.84					53.2593	93.816	19.75	74.066	127.027	6.4	120.627					72.0483	37	9.6	27.4	29	9.8	19.2
	73.092	22	11	11	75	6.15	68.85					53.3329	89.34	19.75	69.59	135.44	6.4	129.04					72.1479	41	9.6	31.4	33	9.8	23.2
	73.192	28	11	17	54	6.15	47.85					53.4065	103.237	19.75	83.487	131.698	6.4	125.298					72.2474	37	9.6	27.4	37	9.8	27.2
	73.293	28	11	17	52	6.15	45.85					53.48	121.613	19.75	101.863	119.32	6.4	112.92					72.3469	67	9.6	57.4	36	9.8	26.2
	73.394	26	11	15	52	6.15	45.85					53.5536	128.458	19.75	108.708	86.74	6.4	80.34					72.4464	105.027	9.6	95.427	30.4289	9.8	20.6289
	73.495	24.293	11	13.293	51	6.15	44.85					53.6272	119.7	19.75	99.95	76.49	6.4	70.09					72.5459	117.4	9.6	107.8	32.3	9.8	22.5
	73.596	23	11	12	53.3	6.15	47.15					53.7007	91.1	19.75	71.35	75.07	6.4	68.67					72.6454	76.38	9.6	66.78	32.68	9.8	22.88
	73.697	21.68	11	10.68	58.3	6.15	52.15					53.7743	83	19.75	63.25	35	6.4	28.6					72.7449	38.967	9.6	29.367	39.1932	9.8	29.3932
	73.797	22.32	11	11.32	54.06	6.15	47.91					53.8478	60	19.75	40.25	30	6.4	23.6					72.8444	23.22	9.6	13.62	56.09	9.8	46.29
	73.898	19.24	11	8.24	54.76	6.15	48.61					53.9214	58	19.75	38.25	22	6.4	15.6					72.944	23.58	9.6	13.98	60.78	9.8	50.98
	73.999	23	11	12	47	6.15	40.85					53.995	62	19.75	42.25	20	6.4	13.6					73.0435	22.04	9.6	12.44	44.26	9.8	34.46
	74.1	26	11	15	46	6.15	39.85					54.0685	67	19.75	47.25	43	6.4	36.6					73.143	23.96	9.6	14.36	34.2	9.8	24.4
	74.201	27	11	16	54	6.15	47.85					54.1421	59.686	19.75	39.936	41.515	6.4	35.115					73.2425	24	9.6	14.4	43.8	9.8	34
	74.301	38	11	27	60	6.15	53.85					54.2157	59.66	19.75	39.91	60.18	6.4	53.78					73.342	21.13	9.6	11.53	42.5299	9.8	32.7299
	74.402	37.914	11	26.914	52.05	6.15	45.9					54.2892	60	19.75	40.25	76.46	6.4	70.06					73.4415	23.3	9.6	13.7	37.75	9.8	27.95
	74.503	33.04	11	22.04	48.32	6.15	42.17					54.3628	52	19.75	32.25	98	6.4	91.6					73.541	21.4	9.6	11.8	35.35	9.8	25.55
	74.604	32.32	11	21.32	45.7	6.15	39.55					54.4363	47	19.75	27.25	123	6.4	116.6					73.6406	20	9.6	10.4	36.3	9.8	26.5
	74.705	34.249	11	23.249	40.154	6.15	34.004					54.5099	36	19.75	16.25	113	6.4	106.6					73.7401	19.35	9.6	9.75	36.35	9.8	26.55
	74.805	32.22	11	21.22	39.17	6.15	33.02					54.5835	33	19.75	13.25	97	6.4	90.6					73.8396	19.65	9.6	10.05	32.1	9.8	22.3
	74.906	29.05	11	18.05	44.12	6.15	37.97					54.657	34	19.75	14.25	78	6.4	71.6					73.9391	16.705	9.6	7.105	32.2678	9.8	22.4678
	75.007	25.002	11	14.002	53.101	6.15	46.951					54.7306	25	19.75	5.25	54	6.4	47.6					74.0386	14.62	9.6	5.02	34.28	9.8	24.48
	75.108	25.2	11	14.2	58.116	6.15	51.966					54.8042	24	19.75	4.25	43	6.4	36.6					74.1381	16.34	9.6	6.74	33.32	9.8	23.52
	75.209	24.815	11	13.815	56.878	6.15	50.728					54.8777	23	19.75	3.25	25.373	6.4	18.973					74.2376	16.02	9.6	6.42	24.16	9.8	14.36
	75.31	23.72	11	12.72	51.4	6.15	45.25					54.9513	22.66	19.75	2.91	21	6.4	14.6					74.3372	17.96	9.6	8.36	12.24	9.8	2.44
	75.41	26.16	11	15.16	49.28	6.15	43.13					55.0248	23	19.75	3.25	17.04	6.4	10.64					74.4367	23	9.6	13.4	16	9.8	6.2
	75.511	28.44	11	17.44	41.8	6.15	35.65					55.0984	23	19.75	3.25	19.62	6.4	13.22					74.5362	21	9.6	11.4	10	9.8	0.2
	75.612	26.242	11	15.242	34.531	6.15	28.381					55.172	23	19.75	3.25	22	6.4	15.6					74.6357	25	9.6	15.4	12	9.8	2.2
	75.713	23.12	11	12.12	31.32	6.15	25.17					55.2455	22.967	19.75	3.217	25.03	6.4	18.63					74.7352	33	9.6	23.4	10	9.8	0.2
	75.814	23.509	11	12.509	31.313	6.15	25.163					55.3191	22.56	19.75	2.81	22.44	6.4	16.04					74.8347	32	9.6	22.4	19	9.8	9.2
	75.914	27.818	11	16.818	36.148	6.15	29.998					55.3927	20.26	19.75	0.51	23.16	6.4	16.76					74.9342	33	9.6	23.4	22	9.8	12.2
	76.015	27.493	11	16.493	37.489	6.15	31.339					55.4662	20.96	19.75	1.21	29.88	6.4	23.48					75.0338	30	9.6	20.4	32	9.8	22.2
	76.116	24.495	11	13.495	43.167	6.15	37.017					55.5398	23	19.75	3.25	56	6.4	49.6					75.1333	27.536	9.6	17.936	27.636	9.8	17.836
	76.217	26.185	11	15.185	52.089	6.15	45.939					55.6133	16	19.75	-3.75	57	6.4	50.6					75.2328	25.64	9.6	16.04	34.26	9.8	24.46
	76.318	27.65	11	16.65	60.85	6.15	54.7					55.6869	17	19.75	-2.75	45	6.4	38.6					75.3323	20.42	9.6	10.82	43.64	9.8	33.84
	76.419	30.78	11	19.78	45.31	6.15	39.16					55.7605	20	19.75	0.25	67	6.4	60.6					75.4318	26	9.6	16.4	61	9.8	51.2
	76.519	28.366	11	17.366	47.585	6.15	41.435					55.834	19.586	19.75	-0.164	56.222	6.4	49.822					75.5313	22	9.6	12.4	69	9.8	59.2
	76.62	28.59	11	17.59	68.47	6.15	62.32					55.9076	20.66	19.75	0.91	67.16	6.4	60.76					75.6308	17.722	9.6	8.122	46.8726	9.8	37.0726
	76.721	29.91	11	18.91	66.53	6.15	60.38					55.9812	21	19.75	1.25	58.14	6.4	51.74					75.7304	14.7	9.6	5.1	37.34	9.8	27.54
	76.822	33.64	11	22.64	72.28	6.15	66.13					56.0547	21	19.75	1.25	85	6.4	78.6					75.8299	19.58	9.6	9.98	39.82	9.8	30.02
	76.923	34	11	23	77	6.15	70.85					56.1283	20	19.75	0.25	61	6.4	54.6					75.9294	19	9.6	9.4	27	9.8	17.2
	77.023	28.757	11	17.757	62.979	6.15	56.829					56.2018	21	19.75	1.25	51	6.4	44.6					76.0289	19	9.6	9.4	22	9.8	12.2
	77.124	25.34	11	14.34	42.14	6.15	35.99					56.2754	20	19.75	0.25	52	6.4	45.6					76.1284	21	9.6	11.4	29	9.8	19.2
	77.225	26.249	11	15.249	33.968	6.15	27.818					56.349	20	19.75	0.25	50	6.4	43.6					76.2279	21	9.6	11.4	15	9.8	5.2
	77.326	28.12	11	17.12	41.19	6.15	35.04					56.4225	25	19.75	5.25	36	6.4	29.6					76.3274	24	9.6	14.4	18	9.8	8.2
	77.427	29.84	11	18.84	42.94	6.15	36.79					56.4961	25.086	19.75	5.336	29.464	6.4	23.064					76.427	30	9.6	20.4	18	9.8	8.2
	77.528	25.08	11	14.08	36.08	6.15	29.93					56.5697	26.66	19.75	6.91	30.28	6.4	23.88					76.5265	26	9.6	16.4	23	9.8	13.2
	77.628	23.04	11	12.04	52.66	6.15	46.51					56.6432	31.62	19.75	11.87	38.28	6.4	31.88					76.626	28	9.6	18.4	24	9.8	14.2
	77.729	28.74	11	17.74	85.972	6.15	79.822					56.7168	28.36	19.75	8.61	41	6.4	34.6					76.7255	28	9.6	18.4	18	9.8	8.2
	77.83	27.318	11	16.318	108.564	6.15	102.414					56.7903	36	19.75	16.25	51	6.4	44.6					76.825	33	9.6	23.4	15	9.8	5.2
	77.931	26.923	11	15.923	103.557	6.15	97.407					56.8639	33.707	19.75	13.957	56.692	6.4	50.292					76.9245	36	9.6	26.4	21	9.8	11.2
	78.032	28.226	11	17.226	65.039	6.15	58.889					56.9375	31	19.75	11.25	72.18	6.4	65.78					77.024	27	9.6	17.4	18	9.8	8.2
	78.132	33.86	11	22.86	55.38	6.15	49.23					57.011	28.18	19.75	8.43	65.9	6.4	59.5					77.1236	22	9.6	12.4	33	9.8	23.2
	78.233	35.81	11	24.81	63.91	6.15	57.76					57.0846	28	19.75	8.25	68	6.4	61.6					77.2231	20	9.6	10.4	33	9.8	23.2
	78.334	42.86	11	31.86	85.6	6.15	79.45					57.1582	30	19.75	10.25	59	6.4	52.6					77.3226	20	9.6	10.4	43	9.8	33.2
	78.435	36	11	25	90	6.15	83.85					57.2317	29	19.75	9.25	46	6.4	39.6					77.4221	25	9.6	15.4	51	9.8	41.2
	78.536	68	11	57	88	6.15	81.85					57.3053	27	19.75	7.25	49	6.4	42.6					77.5216	38	9.6	28.4	72	9.8	62.2
	78.636	52	11	41	68	6.15	61.85					57.3788	34	19.75	14.25	40	6.4	33.6					77.6211	84	9.6	74.4	58	9.8	48.2
	78.737	46	11	35	64	6.15	57.85					57.4524	31.586	19.75	11.836	43.95	6.4	37.55					77.7206	142	9.6	132.4	47	9.8	37.2
	78.838	43	11	32	48	6.15	41.85					57.526	31.981	19.75	12.231	56.576	6.4	50.176					77.8202	145	9.6	135.4	50	9.8	40.2
	78.939	49	11	38	69	6.15	62.85					57.5995	33.69	19.75	13.94	71.23	6.4	64.83					77.9197	207	9.6	197.4	50	9.8	40.2
	79.04	39.479	11	28.479	77.607	6.15	71.457					57.6731	33.466	19.75	13.716	70.601	6.4	64.201					78.0192	213	9.6	203.4	74	9.8	64.2
	79.141	33.245	11	22.245	71.761	6.15	65.611					57.7467	29.886	19.75	10.136	63.199	6.4	56.799					78.1187	217.207	9.6	207.607	88.6777	9.8	78.8777
	79.241	27.889	11	16.889	62.486	6.15	56.336					57.8202	32.73	19.75	12.98	47.44	6.4	41.04					78.2182	228.92	9.6	219.32	80.46	9.8	70.66
	79.342	27.862	11	16.862	82.886	6.15	76.736					57.8938	41	19.75	21.25	42	6.4	35.6					78.3177	219.14	9.6	209.54	58.82	9.8	49.02
	79.443	31.515	11	20.515	93.294	6.15	87.144					57.9673	34	19.75	14.25	46	6.4	39.6					78.4172	175.7	9.6	166.1	39.12	9.8	29.32
	79.544	31.649	11	20.649	80.155	6.15	74.005					58.0409	33	19.75	13.25	41	6.4	34.6					78.5168	116.987	9.6	107.387	31.418	9.8	21.618
	79.645	27.158	11	16.158	48.163	6.15	42.013					58.1145	36	19.75	16.25	48	6.4	41.6					78.6163	66.91	9.6	57.31	29.17	9.8	19.37
	79.745	27.96	11	16.96	41.2	6.15	35.05					58.188	34	19.75	14.25	55	6.4	48.6					78.7158	50.37	9.6	40.77	32.58	9.8	22.78
	79.846	34	11	23	34	6.15	27.85					58.2616	30.929	19.75	11.179	55.914	6.4	49.514					78.8153	41.2	9.6	31.6	20.26	9.8	10.46
	79.947	31	11	20	31	6.15	24.85					58.3352	32	19.75	12.25	56.66	6.4	50.26					78.9148	35.12	9.6	25.52	20	9.8	10.2
	80.048	39	11	28	33	6.15	26.85					58.4087	32.783	19.75	13.033	64.06	6.4	57.66					79.0143	38.92	9.6	29.32	20.98	9.8	11.18
	80.149	38	11	27	28	6.15	21.85					58.4823	41.023	19.75	21.273	84.103	6.4	77.703					79.1138	40	9.6	30.4	15	9.8	5.2
	80.25	35.015	11	24.015	22.015	6.15	15.865					58.5558	68.909	19.75	49.159	114.705	6.4	108.305					79.2134	24	9.6	14.4	22	9.8	12.2
	80.35	31.72	11	20.72	20.34	6.15	14.19					58.6294	78.51	19.75	58.76	123.58	6.4	117.18					79.3129	19	9.6	9.4	19	9.8	9.2
	80.451	33.7	11	22.7	10.6	6.15	4.45					58.703	84	19.75	64.25	135	6.4	128.6					79.4124	18.707	9.6	9.107	16.8787	9.8	7.0787
	80.552	38	11	27	14	6.15	7.85					58.7765	75	19.75	55.25	109	6.4	102.6					79.5119	19.807	9.6	10.207	16.7985	9.8	6.9985
	80.653	48.591	11	37.591	22.475	6.15	16.325					58.8501	62	19.75	42.25	115	6.4	108.6					79.6114	20	9.6	10.4	16.61	9.8	6.81
	80.754	62.039	11	51.039	27.4	6.15	21.25					58.9237	47	19.75	27.25	88	6.4	81.6					79.7109	19.36	9.6	9.76	25.84	9.8	16.04
	80.854	81.838	11	70.838	29.448	6.15	23.298					58.9972	42.793	19.75	23.043	83.515	6.4	77.115					79.8104	13.42	9.6	3.82	18.7	9.8	8.9
	80.955	96.43	11	85.43	31.87	6.15	25.72					59.0708	35.038	19.75	15.288	79.411	6.4	73.011					79.91	17.031	9.6	7.431	23.856	9.8	14.056
	81.056	83.06	11	72.06	39.46	6.15	33.31					59.1443	31.62	19.75	11.87	71.16	6.4	64.76					80.0095	19.62	9.6	10.02	30	9.8	20.2
	81.157	70.2	11	59.2	43.92	6.15	37.77					59.2179	32.12	19.75	12.37	72.04	6.4	65.64					80.109	16.32	9.6	6.72	30	9.8	20.2
	81.258	51.309	11	40.309	35.95	6.15	29.8					59.2915	27.56	19.75	7.81	66.7	6.4	60.3					80.2085	23	9.6	13.4	35	9.8	25.2
	81.359	52.5	11	41.5	32.7	6.15	26.55					59.365	34	19.75	14.25	87	6.4	80.6					80.308	19	9.6	9.4	35	9.8	25.2
	81.459	49.844	11	38.844	52.568	6.15	46.418					59.4386	27	19.75	7.25	78	6.4	71.6					80.4075	17	9.6	7.4	33	9.8	23.2
	81.56	43.94	11	32.94	78.78	6.15	72.63					59.5122	29.828	19.75	10.078	67.929	6.4	61.529					80.507	16	9.6	6.4	21	9.8	11.2
	81.661	50.515	11	39.515	104.631	6.15	98.481					59.5857	29.541	19.75	9.791	69.369	6.4	62.969					80.6066	20	9.6	10.4	21	9.8	11.2
	81.762	42.652	11	31.652	95.719	6.15	89.569					59.6593	29.85	19.75	10.1	76.84	6.4	70.44					80.7061	30	9.6	20.4	32	9.8	22.2
	81.863	36.843	11	25.843	71.577	6.15	65.427					59.7328	33.04	19.75	13.29	95.16	6.4	88.76					80.8056	20	9.6	10.4	21	9.8	11.2
	81.963	39.508	11	28.508	48.433	6.15	42.283					59.8064	31.42	19.75	11.67	104.79	6.4	98.39					80.9051	26	9.6	16.4	26	9.8	16.2
	82.064	43.46	11	32.46	37.08	6.15	30.93					59.88	26.35	19.75	6.6	92.91	6.4	86.51					81.0046	26	9.6	16.4	34	9.8	24.2
	82.165	45.824	11	34.824	31.373	6.15	25.223					59.9535	31	19.75	11.25	103	6.4	96.6					81.1041	30	9.6	20.4	44	9.8	34.2
	82.266	42.76	11	31.76	28	6.15	21.85					60.0271	30	19.75	10.25	91	6.4	84.6					81.2036	26	9.6	16.4	35	9.8	25.2
	82.367	32.615	11	21.615	32.258	6.15	26.108					60.1007	36	19.75	16.25	96	6.4	89.6					81.3032	27	9.6	17.4	49	9.8	39.2
	82.467	28.239	11	17.239	38.508	6.15	32.358					60.1742	32	19.75	12.25	77	6.4	70.6					81.4027	26	9.6	16.4	34	9.8	24.2
	82.568	29.75	11	18.75	37.95	6.15	31.8					60.2478	32	19.75	12.25	94	6.4	87.6					81.5022	20	9.6	10.4	35	9.8	25.2
	82.669	37.55	11	26.55	30.4	6.15	24.25					60.3214	28	19.75	8.25	81	6.4	74.6					81.6017	23.536	9.6	13.936	26.9289	9.8	17.1289
	82.77	50.9	11	39.9	16.85	6.15	10.7					60.3949	25.707	19.75	5.957	81.95	6.4	75.55					81.7012	23.02	9.6	13.42	28.94	9.8	19.14
	82.871	101.04	11	90.04	14.8	6.15	8.65					60.4685	20.36	19.75	0.61	67.46	6.4	61.06					81.8007	21.06	9.6	11.46	27.3	9.8	17.5
	82.972	130.49	11	119.49	10.18	6.15	4.03					60.542	20.249	19.75	0.499	52.475	6.4	46.075					81.9002	20	9.6	10.4	30	9.8	20.2
	83.072	122.27	11	111.27	15.82	6.15	9.67					60.6156	18.61	19.75	-1.14	40.1	6.4	33.7					81.9998	20	9.6	10.4	32	9.8	22.2
	83.173	91.93	11	80.93	19.88	6.15	13.73					60.6892	16.559	19.75	-3.191	35.328	6.4	28.928					82.0993	17	9.6	7.4	25	9.8	15.2
	83.274	69.415	11	58.415	37.968	6.15	31.818					60.7627	14.92	19.75	-4.83	39.04	6.4	32.64					82.1988	17.293	9.6	7.693	24.4645	9.8	14.6645
	83.375	60.72	11	49.72	77.16	6.15	71.01					60.8363	14.16	19.75	-5.59	27.76	6.4	21.36					82.2983	18.66	9.6	9.06	18.74	9.8	8.94
	83.476	56.16	11	45.16	112.84	6.15	106.69					60.9099	16.08	19.75	-3.67	25.16	6.4	18.76					82.3978	19.94	9.6	10.34	27.22	9.8	17.42
	83.576	45.63	11	34.63	133.3	6.15	127.15					60.9834	16.84	19.75	-2.91	26.92	6.4	20.52					82.4973	16	9.6	6.4	30	9.8	20.2
	83.677	41	11	30	125	6.15	118.85					61.057	15.16	19.75	-4.59	25.2	6.4	18.8					82.5968	17	9.6	7.4	32	9.8	22.2
	83.778	36	11	25	78	6.15	71.85					61.1305	17.32	19.75	-2.43	16.32	6.4	9.92					82.6964	18	9.6	8.4	23	9.8	13.2
	83.879	31	11	20	46	6.15	39.85					61.2041	21	19.75	1.25	19.92	6.4	13.52					82.7959	20	9.6	10.4	30	9.8	20.2
	83.98	30	11	19	48	6.15	41.85					61.2777	20.84	19.75	1.09	19.64	6.4	13.24					82.8954	24	9.6	14.4	32	9.8	22.2
	84.081	33	11	22	47	6.15	40.85					61.3512	19.4	19.75	-0.35	27.56	6.4	21.16					82.9949	22	9.6	12.4	13	9.8	3.2
	84.181	32.414	11	21.414	35	6.15	28.85					61.4248	23.84	19.75	4.09	34.32	6.4	27.92					83.0944	18	9.6	8.4	28	9.8	18.2
	84.282	29.68	11	18.68	23	6.15	16.85					61.4984	22.114	19.75	2.364	36.679	6.4	30.279					83.1939	26	9.6	16.4	20	9.8	10.2
	84.383	28.34	11	17.34	23	6.15	16.85					61.5719	26.481	19.75	6.731	31.881	6.4	25.481					83.2934	30	9.6	20.4	15	9.8	5.2
	84.484	32.7	11	21.7	17.36	6.15	11.21					61.6455	29.76	19.75	10.01	35.28	6.4	28.88					83.393	31	9.6	21.4	11	9.8	1.2
	84.585	32	11	21	15	6.15	8.85					61.719	29.24	19.75	9.49	32.2	6.4	25.8					83.4925	28	9.6	18.4	15	9.8	5.2
	84.685	28	11	17	20	6.15	13.85					61.7926	27.48	19.75	7.73	31	6.4	24.6					83.592	28	9.6	18.4	14	9.8	4.2
	84.786	31	11	20	25	6.15	18.85					61.8662	29.28	19.75	9.53	31	6.4	24.6					83.6915	22	9.6	12.4	14	9.8	4.2
	84.887	32	11	21	22	6.15	15.85					61.9397	32.28	19.75	12.53	36.32	6.4	29.92
	84.988	33	11	22	28	6.15	21.85					62.0133	33.76	19.75	14.01	47.88	6.4	41.48
	85.089	34	11	23	29	6.15	22.85					62.0869	37.8	19.75	18.05	64.68	6.4	58.28
	85.19	35	11	24	48	6.15	41.85					62.1604	43.302	19.75	23.552	69.672	6.4	63.272
	85.29	37	11	26	58	6.15	51.85					62.234	46.49	19.75	26.74	71.49	6.4	65.09
	85.391	37	11	26	125	6.15	118.85					62.3075	47	19.75	27.25	60.82	6.4	54.42
	85.492	41.864	11	30.864	122.157	6.15	116.007					62.3811	60.76	19.75	41.01	59	6.4	52.6
	85.593	43.66	11	32.66	123.26	6.15	117.11					62.4547	79.34	19.75	59.59	84.8	6.4	78.4
	85.694	38.36	11	27.36	94.1	6.15	87.95					62.5282	94.9	19.75	75.15	108.78	6.4	102.38
	85.794	38	11	27	85	6.15	78.85					62.6018	104.74	19.75	84.99	136.94	6.4	130.54
	85.895	38	11	27	74	6.15	67.85					62.6754	111.16	19.75	91.41	134.98	6.4	128.58
	85.996	40	11	29	86	6.15	79.85					62.7489	89.64	19.75	69.89	115.94	6.4	109.54
	86.097	41	11	30	72	6.15	65.85					62.8225	87.72	19.75	67.97	95.8	6.4	89.4
	86.198	35	11	24	58	6.15	51.85					62.896	82.84	19.75	63.09	80.1	6.4	73.7
	86.299	36.207	11	25.207	49.793	6.15	43.643					62.9696	72.54	19.75	52.79	79.72	6.4	73.32
	86.399	32.135	11	21.135	43.948	6.15	37.798					63.0432	64.98	19.75	45.23	76.56	6.4	70.16
	86.5	29.412	11	18.412	51.754	6.15	45.604					63.1167	67.44	19.75	47.69	72.56	6.4	66.16
	86.601	27.917	11	16.917	70.003	6.15	63.853					63.1903	70.58	19.75	50.83	69.42	6.4	63.02
	86.702	30.46	11	19.46	71.72	6.15	65.57					63.2639	63.26	19.75	43.51	61.26	6.4	54.86
	86.803	31	11	20	68.06	6.15	61.91					63.3374	69.74	19.75	49.99	59.14	6.4	52.74
	86.903	30.09	11	19.09	44.409	6.15	38.259					63.411	62.09	19.75	42.34	56.03	6.4	49.63
	87.004	31.3	11	20.3	43.25	6.15	37.1					63.4845	54	19.75	34.25	61	6.4	54.6
	87.105	30.51	11	19.51	41.436	6.15	35.286					63.5581	53	19.75	33.25	60	6.4	53.6
	87.206	33	11	22	38.38	6.15	32.23					63.6317	57	19.75	37.25	54	6.4	47.6
	87.307	35.66	11	24.66	41.66	6.15	35.51					63.7052	53	19.75	33.25	51	6.4	44.6
	87.407	40.38	11	29.38	50.18	6.15	44.03					63.7788	62	19.75	42.25	55	6.4	48.6
	87.508	38.66	11	27.66	63.24	6.15	57.09					63.8524	67	19.75	47.25	60	6.4	53.6
	87.609	40.003	11	29.003	62.666	6.15	56.516					63.9259	57.686	19.75	37.936	57.515	6.4	51.115
	87.71	44	11	33	58	6.15	51.85					63.9995	58.96	19.75	39.21	58.68	6.4	52.28
	87.811	54	11	43	62.5	6.15	56.35					64.073	47.8	19.75	28.05	56.02	6.4	49.62
	87.912	62.197	11	51.197	59.994	6.15	53.844					64.1466	43.64	19.75	23.89	49.06	6.4	42.66
	88.012	64.959	11	53.959	60.158	6.15	54.008					64.2202	42.36	19.75	22.61	39.4	6.4	33
	88.113	76.64	11	65.64	63.4	6.15	57.25					64.2937	40.06	19.75	20.31	47.28	6.4	40.88
	88.214	105.24	11	94.24	82.76	6.15	76.61					64.3673	38	19.75	18.25	39	6.4	32.6
	88.315	122.529	11	111.529	91.797	6.15	85.647					64.4409	38	19.75	18.25	39	6.4	32.6
	88.416	99.451	11	88.451	92.891	6.15	86.741					64.5144	55	19.75	35.25	60	6.4	53.6
	88.516	76.23	11	65.23	80.13	6.15	73.98					64.588	58.5	19.75	38.75	90.027	6.4	83.627
	88.617	64	11	53	64	6.15	57.85					64.6615	54.74	19.75	34.99	112.88	6.4	106.48
	88.718	63	11	52	70	6.15	63.85					64.7351	47.7	19.75	27.95	113.06	6.4	106.66
	88.819	51	11	40	86	6.15	79.85					64.8087	44.68	19.75	24.93	108.68	6.4	102.28
	88.92	55.944	11	44.944	112.927	6.15	106.777					64.8822	43.06	19.75	23.31	105.18	6.4	98.78
	89.021	58.533	11	47.533	143.61	6.15	137.46					64.9558	48	19.75	28.25	101	6.4	94.6
	89.121	56.961	11	45.961	163.971	6.15	157.821					65.0294	42	19.75	22.25	85	6.4	78.6
	89.222	50.588	11	39.588	163.762	6.15	157.612					65.1029	43	19.75	23.25	98	6.4	91.6
	89.323	47	11	36	112.84	6.15	106.69					65.1765	34	19.75	14.25	93	6.4	86.6
	89.424	46.05	11	35.05	67.35	6.15	61.2					65.25	34	19.75	14.25	91	6.4	84.6
	89.525	57	11	46	45	6.15	38.85					65.3236	36	19.75	16.25	93	6.4	86.6
	89.625	45.858	11	34.858	30.115	6.15	23.965					65.3972	36	19.75	16.25	89	6.4	82.6
	89.726	39.7	11	28.7	23.36	6.15	17.21					65.4707	40	19.75	20.25	92	6.4	85.6
	89.827	40.82	11	29.82	22	6.15	15.85					65.5443	43.657	19.75	23.907	85.979	6.4	79.579
	89.928	39.12	11	28.12	25.76	6.15	19.61					65.6179	41.914	19.75	22.164	80.745	6.4	74.345
	90.029	41	11	30	30	6.15	23.85					65.6914	40.62	19.75	20.87	77.172	6.4	70.772
	90.13	36	11	25	41	6.15	34.85					65.765	43.719	19.75	23.969	69.965	6.4	63.565
	90.23	34.793	11	23.793	42.743	6.15	36.593					65.8385	46.273	19.75	26.523	74.354	6.4	67.954
	90.331	30.7	11	19.7	43.98	6.15	37.83					65.9121	42.098	19.75	22.348	72.884	6.4	66.484
	90.432	36.52	11	25.52	57.22	6.15	51.07					65.9857	40.894	19.75	21.144	71.26	6.4	64.86
	90.533	31	11	20	50	6.15	43.85					66.0592	38.12	19.75	18.37	64.28	6.4	57.88
	90.634	36	11	25	41	6.15	34.85					66.1328	42	19.75	22.25	65	6.4	58.6
	90.734	33	11	22	66	6.15	59.85					66.2064	58.485	19.75	38.735	62.343	6.4	55.943
	90.835	26.136	11	15.136	77.87	6.15	71.72					66.2799	88.845	19.75	69.095	71.032	6.4	64.632
	90.936	24.899	11	13.899	78.77	6.15	72.62					66.3535	123.883	19.75	104.133	84.546	6.4	78.146
	91.037	27.149	11	16.149	80.346	6.15	74.196					66.427	147.573	19.75	127.823	98.2	6.4	91.8
	91.138	29.196	11	18.196	71.786	6.15	65.636					66.5006	150.9	19.75	131.15	106.46	6.4	100.06
	91.238	33.104	11	22.104	55.772	6.15	49.622					66.5742	141.18	19.75	121.43	96.22	6.4	89.82
	91.339	33.84	11	22.84	49.58	6.15	43.43					66.6477	117	19.75	97.25	106	6.4	99.6
	91.44	35.81	11	24.81	53.05	6.15	46.9					66.7213	104	19.75	84.25	84	6.4	77.6
	91.541	39.92	11	28.92	47.14	6.15	40.99					66.7949	119	19.75	99.25	84	6.4	77.6
	91.642	53	11	42	77	6.15	70.85					66.8684	126	19.75	106.25	82	6.4	75.6
	91.743	65	11	54	68	6.15	61.85					66.942	146	19.75	126.25	65	6.4	58.6
	91.843	72	11	61	52	6.15	45.85					67.0155	164	19.75	144.25	57	6.4	50.6
	91.944	62	11	51	53	6.15	46.85					67.0891	168.914	19.75	149.164	79.299	6.4	72.899
	92.045	73.056	11	62.056	56.05	6.15	49.9					67.1627	149.084	19.75	129.334	99.109	6.4	92.709
	92.146	77.918	11	66.918	60.782	6.15	54.632					67.2362	120.612	19.75	100.862	112.792	6.4	106.392
	92.247	70.63	11	59.63	56.15	6.15	50					67.3098	103.317	19.75	83.567	108.685	6.4	102.285
	92.347	53.7	11	42.7	60	6.15	53.85					67.3834	76.4	19.75	56.65	96.34	6.4	89.94
	92.448	46.373	11	35.373	57.828	6.15	51.678					67.4569	82.76	19.75	63.01	80.28	6.4	73.88
	92.549	50.24	11	39.24	51.63	6.15	45.48					67.5305	65	19.75	45.25	64	6.4	57.6
	92.65	55.55	11	44.55	51	6.15	44.85					67.604	45	19.75	25.25	50	6.4	43.6
	92.751	67.83	11	56.83	51.91	6.15	45.76					67.6776	55	19.75	35.25	54	6.4	47.6
	92.852	69.91	11	58.91	58.37	6.15	52.22					67.7512	42	19.75	22.25	55	6.4	48.6
	92.952	60.9	11	49.9	63.55	6.15	57.4					67.8247	38.393	19.75	18.643	60.964	6.4	54.564
	93.053	55.45	11	44.45	63.09	6.15	56.94					67.8983	39.02	19.75	19.27	71.64	6.4	65.24
	93.154	46.81	11	35.81	53.9	6.15	47.75					67.9719	37.34	19.75	17.59	71.02	6.4	64.62
	93.255	45.325	11	34.325	52.342	6.15	46.192					68.0454	33.7	19.75	13.95	60.1	6.4	53.7
	93.356	44.2	11	33.2	68.2	6.15	62.05					68.119	33.88	19.75	14.13	67.22	6.4	60.82
	93.456	39.32	11	28.32	67.96	6.15	61.81					68.1926	35	19.75	15.25	58	6.4	51.6
	93.557	42.68	11	31.68	71.6	6.15	65.45					68.2661	42	19.75	22.25	71	6.4	64.6
	93.658	43	11	32	70.16	6.15	64.01					68.3397	35	19.75	15.25	54	6.4	47.6
	93.759	43.92	11	32.92	77.36	6.15	71.21					68.4132	31	19.75	11.25	41	6.4	34.6
	93.86	44	11	33	77.08	6.15	70.93					68.4868	33	19.75	13.25	50	6.4	43.6
	93.961	47	11	36	72	6.15	65.85					68.5604	28	19.75	8.25	36	6.4	29.6
	94.061	42	11	31	78	6.15	71.85					68.6339	27.379	19.75	7.629	29.257	6.4	22.857
	94.162	47	11	36	74	6.15	67.85					68.7075	28.66	19.75	8.91	26.32	6.4	19.92
	94.263	43	11	32	65	6.15	58.85					68.7811	33.7	19.75	13.95	30.76	6.4	24.36
	94.364	41	11	30	57	6.15	50.85					68.8546	34	19.75	14.25	25	6.4	18.6
	94.465	37	11	26	54	6.15	47.85					68.9282	28	19.75	8.25	20	6.4	13.6
	94.565	36	11	25	49	6.15	42.85					69.0017	34	19.75	14.25	25	6.4	18.6
	94.666	36	11	25	48	6.15	41.85					69.0753	36	19.75	16.25	33	6.4	26.6
	94.767	33	11	22	39	6.15	32.85					69.1489	38	19.75	18.25	39	6.4	32.6
	94.868	32	11	21	43	6.15	36.85					69.2224	36	19.75	16.25	39	6.4	32.6
	94.969	25	11	14	48	6.15	41.85					69.296	43	19.75	23.25	43	6.4	36.6
	95.07	27	11	16	82	6.15	75.85					69.3696	40	19.75	20.25	46	6.4	39.6
	95.17	25	11	14	110	6.15	103.85					69.4431	40	19.75	20.25	48	6.4	41.6
	95.271	27	11	16	120	6.15	113.85					69.5167	37	19.75	17.25	46	6.4	39.6
	95.372	30	11	19	91	6.15	84.85					69.5902	44	19.75	24.25	53	6.4	46.6
	95.473	25	11	14	55	6.15	48.85					69.6638	42	19.75	22.25	54	6.4	47.6
	95.574	23	11	12	49	6.15	42.85					69.7374	38	19.75	18.25	41	6.4	34.6
	95.674	23	11	12	52	6.15	45.85					69.8109	33	19.75	13.25	51	6.4	44.6
	95.775	25	11	14	70	6.15	63.85					69.8845	31	19.75	11.25	39	6.4	32.6
	95.876	30	11	19	110	6.15	103.85					69.9581	31.914	19.75	12.164	35.672	6.4	29.272
	95.977	27	11	16	125	6.15	118.85					70.0316	31.34	19.75	11.59	35.98	6.4	29.58
	96.078	25	11	14	121	6.15	114.85					70.1052	31	19.75	11.25	34.885	6.4	28.485
	96.178	26	11	15	77	6.15	70.85					70.1787	31.39	19.75	11.64	25.71	6.4	19.31
	96.279	22	11	11	63	6.15	56.85					70.2523	35.95	19.75	16.2	20.58	6.4	14.18
	96.38	21	11	10	44	6.15	37.85					70.3259	32.1	19.75	12.35	21	6.4	14.6
	96.481	17	11	6	40	6.15	33.85					70.3994	37.88	19.75	18.13	22.96	6.4	16.56
	96.582	17	11	6	34	6.15	27.85					70.473	35.9	19.75	16.15	24.54	6.4	18.14
	96.683	19	11	8	29	6.15	22.85					70.5466	36.3	19.75	16.55	26.75	6.4	20.35
	96.783	18.293	11	7.293	26.914	6.15	20.764					70.6201	35.991	19.75	16.241	23.704	6.4	17.304
	96.884	18.348	11	7.348	28.067	6.15	21.917					70.6937	36	19.75	16.25	21.52	6.4	15.12
	96.985	20.23	11	9.23	33.38	6.15	27.23					70.7672	36.38	19.75	16.63	24.38	6.4	17.98
	97.086	22.635	11	11.635	42.311	6.15	36.161					70.8408	34.927	19.75	15.177	24.244	6.4	17.844
	97.187	25.049	11	14.049	60.404	6.15	54.254					70.9144	33.94	19.75	14.19	22.3	6.4	15.9
	97.287	22.27	11	11.27	58.45	6.15	52.3					70.9879	32.947	19.75	13.197	27.063	6.4	20.663
	97.388	28	11	17	51	6.15	44.85					71.0615	32.82	19.75	13.07	28.93	6.4	22.53
	97.489	26.47	11	15.47	36.428	6.15	30.278					71.1351	35.96	19.75	16.21	29.26	6.4	22.86
	97.59	30.216	11	19.216	32.489	6.15	26.339					71.2086	36.26	19.75	16.51	34.18	6.4	27.78
	97.691	25.54	11	14.54	42.92	6.15	36.77					71.2822	36	19.75	16.25	33.09	6.4	26.69
	97.792	20.88	11	9.88	44.44	6.15	38.29					71.3557	37	19.75	17.25	27	6.4	20.6
	97.892	20.931	11	9.931	40.173	6.15	34.023					71.4293	38	19.75	18.25	28	6.4	21.6
	97.993	21	11	10	32.5	6.15	26.35					71.5029	34	19.75	14.25	20	6.4	13.6
	98.094	20.726	11	9.726	31.64	6.15	25.49					71.5764	43	19.75	23.25	27	6.4	20.6
	98.195	20.44	11	9.44	33.12	6.15	26.97					71.65	39	19.75	19.25	22	6.4	15.6
	98.296	21.877	11	10.877	30.345	6.15	24.195					71.7236	32	19.75	12.25	22	6.4	15.6
	98.396	23	11	12	32.254	6.15	26.104					71.7971	30	19.75	10.25	28	6.4	21.6
	98.497	23	11	12	37	6.15	30.85					71.8707	36	19.75	16.25	33	6.4	26.6
	98.598	25	11	14	34	6.15	27.85					71.9442	38	19.75	18.25	25	6.4	18.6
	98.699	23	11	12	20	6.15	13.85					72.0178	35.257	19.75	15.507	35.728	6.4	29.328
	98.8	27	11	16	30	6.15	23.85					72.0914	35.66	19.75	15.91	50.88	6.4	44.48
	98.901	22	11	11	28	6.15	21.85					72.1649	32.7	19.75	12.95	57	6.4	50.6
	99.001	23.586	11	12.586	60.391	6.15	54.241					72.2385	34.33	19.75	14.58	59.797	6.4	53.397
	99.102	21.9	11	10.9	76.427	6.15	70.277					72.3121	35.61	19.75	15.86	57.27	6.4	50.87
	99.203	21.54	11	10.54	62.8	6.15	56.65					72.3856	33.42	19.75	13.67	58.53	6.4	52.13
	99.304	18.85	11	7.85	29.7	6.15	23.55					72.4592	31.04	19.75	11.29	42.36	6.4	35.96
	99.405	16.025	11	5.025	22.773	6.15	16.623					72.5327	32.96	19.75	13.21	33.18	6.4	26.78
	99.505	19.561	11	8.561	21.569	6.15	15.419					72.6063	31.04	19.75	11.29	35.94	6.4	29.54
	99.606	22.337	11	11.337	27.623	6.15	21.473					72.6799	28	19.75	8.25	43	6.4	36.6
	99.707	21.9	11	10.9	32.85	6.15	26.7					72.7534	31	19.75	11.25	51	6.4	44.6
	99.808	21	11	10	38.75	6.15	32.6					72.827	28	19.75	8.25	58	6.4	51.6
	99.909	23.75	11	12.75	39.35	6.15	33.2					72.9006	31	19.75	11.25	41	6.4	34.6
	100.009	26	11	15	47.9	6.15	41.75					72.9741	31	19.75	11.25	73	6.4	66.6
	100.11	32.6	11	21.6	56	6.15	49.85					73.0477	27	19.75	7.25	75	6.4	68.6
	100.211	32.66	11	21.66	71.13	6.15	64.98					73.1212	27	19.75	7.25	88	6.4	81.6
	100.312	30.02	11	19.02	78.94	6.15	72.79					73.1948	26	19.75	6.25	72	6.4	65.6
	100.413	28	11	17	86	6.15	79.85					73.2684	31	19.75	11.25	74	6.4	67.6
	100.514	31.328	11	20.328	77.808	6.15	71.658					73.3419	24	19.75	4.25	53	6.4	46.6
	100.614	36.96	11	25.96	80.28	6.15	74.13					73.4155	27	19.75	7.25	30	6.4	23.6
	100.715	29.6	11	18.6	64.2	6.15	58.05					73.4891	30	19.75	10.25	26	6.4	19.6
	100.816	28.153	11	17.153	53.933	6.15	47.783					73.5626	30	19.75	10.25	18	6.4	11.6
	100.917	26.85	11	15.85	40.81	6.15	34.66					73.6362	27.136	19.75	7.386	15.5	6.4	9.1
	101.018	23.11	11	12.11	28.44	6.15	22.29					73.7097	25.36	19.75	5.61	12.34	6.4	5.94
	101.118	23.86	11	12.86	34.23	6.15	28.08					73.7833	24.94	19.75	5.19	12	6.4	5.6
	101.219	17	11	6	32	6.15	25.85					73.8569	22	19.75	2.25	20	6.4	13.6
	101.32	31	11	20	48	6.15	41.85					73.9304	27	19.75	7.25	21	6.4	14.6
	101.421	24	11	13	39	6.15	32.85					74.004	28	19.75	8.25	21	6.4	14.6
	101.522	22.586	11	11.586	33.722	6.15	27.572					74.0776	31	19.75	11.25	29	6.4	22.6
	101.623	22.555	11	11.555	33.381	6.15	27.231					74.1511	28	19.75	8.25	18	6.4	11.6
	101.723	21.46	11	10.46	34.68	6.15	28.53					74.2247	28	19.75	8.25	30	6.4	23.6
	101.824	24.38	11	13.38	51.14	6.15	44.99					74.2982	32	19.75	12.25	25	6.4	18.6
	101.925	29.69	11	18.69	68.68	6.15	62.53					74.3718	29.757	19.75	10.007	27.536	6.4	21.136
	102.026	32.047	11	21.047	85.511	6.15	79.361					74.4454	31.98	19.75	12.23	41.2	6.4	34.8
	102.127	36.08	11	25.08	101.068	6.15	94.918					74.5189	31.002	19.75	11.252	41.239	6.4	34.839
	102.227	32.45	11	21.45	112.1	6.15	105.95					74.5925	33	19.75	13.25	30.05	6.4	23.65
	102.328	37.46	11	26.46	128.47	6.15	122.32					74.6661	32.21	19.75	12.46	20.68	6.4	14.28
	102.429	44.37	11	33.37	119.99	6.15	113.84					74.7396	32.79	19.75	13.04	15.84	6.4	9.44
	102.53	40.45	11	29.45	90.79	6.15	84.64					74.8132	33.98	19.75	14.23	12.06	6.4	5.66
	102.631	37	11	26	104	6.15	97.85					74.8867	30	19.75	10.25	19	6.4	12.6
	102.732	29	11	18	95	6.15	88.85					74.9603	27	19.75	7.25	23	6.4	16.6
	102.832	31	11	20	103	6.15	96.85					75.0339	31.036	19.75	11.286	17.808	6.4	11.408
	102.933	27.257	11	16.257	101.985	6.15	95.835					75.1074	31.02	19.75	11.27	19.32	6.4	12.92
	103.034	23.36	11	12.36	88.74	6.15	82.59					75.181	28.02	19.75	8.27	22.64	6.4	16.24
												75.2546	26.734	19.75	6.984	27.347	6.4	20.947
												75.3281	26.39	19.75	6.64	30.39	6.4	23.99
												75.4017	26.61	19.75	6.86	31.78	6.4	25.38
												75.4753	25.22	19.75	5.47	31.05	6.4	24.65
												75.5488	24.78	19.75	5.03	27.61	6.4	21.21
												75.6224	27.56	19.75	7.81	28.17	6.4	21.77
												75.6959	29.61	19.75	9.86	27.66	6.4	21.26
												75.7695	29	19.75	9.25	30.24	6.4	23.84
												75.8431	27.44	19.75	7.69	43.12	6.4	36.72
												75.9166	26.56	19.75	6.81	47.61	6.4	41.21
												75.9902	29.39	19.75	9.64	48.17	6.4	41.77
												76.0638	31.58	19.75	11.83	64.22	6.4	57.82
												76.1373	31.02	19.75	11.27	57.22	6.4	50.82
												76.2109	31.98	19.75	12.23	46.22	6.4	39.82
												76.2844	32	19.75	12.25	53	6.4	46.6
												76.358	28	19.75	8.25	45	6.4	38.6
												76.4316	25	19.75	5.25	25	6.4	18.6
												76.5051	24	19.75	4.25	19	6.4	12.6
												76.5787	27	19.75	7.25	20	6.4	13.6
												76.6523	22	19.75	2.25	17	6.4	10.6
												76.7258	22	19.75	2.25	20	6.4	13.6
												76.7994	25	19.75	5.25	21	6.4	14.6
												76.8729	19	19.75	-0.75	29	6.4	22.6
												76.9465	25	19.75	5.25	35	6.4	28.6
												77.0201	22	19.75	2.25	57	6.4	50.6
												77.0936	23	19.75	3.25	55	6.4	48.6
												77.1672	26	19.75	6.25	74	6.4	67.6
												77.2408	28	19.75	8.25	71	6.4	64.6
												77.3143	24	19.75	4.25	46	6.4	39.6
												77.3879	27	19.75	7.25	45	6.4	38.6
												77.4614	30	19.75	10.25	39	6.4	32.6
												77.535	24.929	19.75	5.179	25.908	6.4	19.508
												77.6086	22.68	19.75	2.93	23.34	6.4	16.94
												77.6821	24.82	19.75	5.07	18.3	6.4	11.9
												77.7557	24	19.75	4.25	17	6.4	10.6

## Sheet: Figure S4 (b)
ATG14 siRNA								ULK1 siRNA
Western Blot Quantification								Western Blot Quantification
	Control siRNA			ATG14 siRNA					Control siRNA			ULK1 siRNA
repeats	1	2	3	1	2	3		repeats	1	2	3	1	2	3
actin	15458.9	16417.1	20892	16066.1	14691.3	13320.8		actin	12392.1	24063.7	22367.5	4183.18	20448.1	18751.7
ATG14	11610.7	10707.8	13804.4	2982.33	2670.5	4794.93		ULK1	22396.8	38366.7	34989.4	2304.82	1968.34	1315.83
ATG14/actin	0.75107	0.652235	0.660753	0.185629	0.181774	0.35996		ULK1/actin	1.80734	1.59438	1.5643	0.550974	0.0962601	0.0701711
average ATG14/actin	0.68802			0.242454				average ULK1/actin	1.65534			0.239135

## Sheet: Figure S4 (c)
Pharmacological treatments
	Control										SBI-0206965
Punctae per cell	7.28571	10.2222	8.375	8.71429	8.5	13.25	12.75	9.66667	14	13.7778	6	5.75	5	5.3	3.90909	5.61538	3.75	3.9	7.4	4.75
Fold changes (compared to averaged control)	10.6542										0.56316	0.539695	0.4693	0.497458	0.366907	0.52706	0.351975	0.366054	0.694564	0.445835
	Control					SAR405
Punctae per cell	11.2857	15.4	10	14.6	15.25	12.7143	5.52632	6.28571	8.11111	7.35294	5.38462	8.625	10.1818	5.11111	9.45455
Fold changes (compared to averaged control)	13.3071					0.955448	0.415289	0.472356	0.609531	0.552556	0.404641	0.648148	0.765139	0.384088	0.710487

## Sheet: Figure S6a
LC3B lipidation
Experiment no:	HeLa	mock	KO + ATG16L1 1-43	KO + ATG16L1 1-207	KO + ATG16L1 1-230	KO + ATG16L1 1-264	KO + ATG16L1 1-307	KO + ATG16L1 FL
Experiment 1	1	0.0105301	0.0266139	0.0163872	0.28484	0.468102	0.66859	0.332757
Experiment 2	1	0.0358244	0.0357326	0.0276679	0.41675	0.255879	0.521997	0.894965
Experiment 3	1	0.0121728	0.0238861	0.0137137	0.378015	0.440827	0.489941	0.519101
